# Supplementary material
Source: PubMed Central journal article supplement (PMC2766167)

# Highly Regio- and Stereoselective Synthesis of Z-Trisubstituted Alkenes via Propyne Bromoboration and Tandem Pd-Catalyzed Cross-Coupling

Chao Wang, Tomas Tobrman, Zhaoqing Xu, and Ei-ichi Negishi\*

Herbert C. Brown Laboratories of Chemistry, Purdue University, 560 Oval Drive, West Lafayette, Indiana 47906-2084

[neqishi@purdue.edu](mailto:neqishi@purdue.edu)

## Supporting Information

### Table of Contents

|                                   |            |
|-----------------------------------|------------|
| General Experiment                | S1         |
| General Procedures and Text Parts | S2 – S-19  |
| NMR Spectrum                      | S20 – S-95 |

**General.** All reactions were run in flame-dried glassware under Argon atmosphere. THF and ether were distilled from sodium and benzophenone. CH<sub>2</sub>Cl<sub>2</sub> was distilled from CaH<sub>2</sub>. Zn dust was activated by rinsing with dilute HCl<sup>[i]</sup> and flame-dried under vacuum prior to use. ZnBr<sub>2</sub> was flame-dried under vacuum. Except for 5-iodo-2-methyl-2-pentene, 1-iodo-3-decyne, (*E*)-1-iodo-2-methyl-1-octene and (*E*)-3-*tert*-butyldimethylsilyloxy-1-iodo-propene, the starting materials were purchased from commercial sources and used as received. 5-iodo-2-methyl-2-pentene<sup>[ii]</sup>, 1-iodo-3-decyne<sup>[iii]</sup>, (*E*)-1-iodo-2-methyl-1-octene<sup>[iv]</sup> and (*E*)-3-*tert*-butyldimethylsilyloxy-1-iodo-propene<sup>[v]</sup> were prepared according to literature procedures. Reactions were monitored by TLC and GC analyses. GC analysis was performed on HP6890 Gas Chromatograph using an HP-5 capillary column (30 m × 0.32 mm, 0.5 μM film) packed with SE-30 on Chromosorb W. Column chromatography was carried out on 230-400 mesh silica gel. <sup>1</sup>H and <sup>13</sup>C NMR spectra were recorded on a Varian-Inova-300 and Bruker-ARX-400. LRMS and HRMS were obtained on Hewlett Packed 5995 GC-MS and Finnigan MATL95 mass spectrometers, respectively.

## (Z)-2-(2'-Bromo-1-propenyl)-4,4,5,5-tetramethyl-1,3,2-dioxaborolane (**2**)

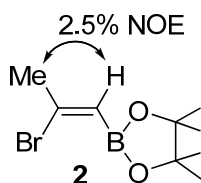

Propyne gas was slowly introduced to a graduated or marked flask or Schlenk tube at  $-78\text{ }^{\circ}\text{C}$ , which was quickly condensed into liquid. Volume of the liquefied propyne can be easily measured by the graduation or markings (in this case: 1.14 mL, 20 mmol). Cooled dry  $\text{CH}_2\text{Cl}_2$  (10 mL) was then added slowly to make a solution. To this stirred solution of propyne in  $\text{CH}_2\text{Cl}_2$  was added a solution of  $\text{BBr}_3$  (2.08 mL, 22 mmol) in dry  $\text{CH}_2\text{Cl}_2$  (20 mL) at  $-78\text{ }^{\circ}\text{C}$ . After 1 h at  $-78\text{ }^{\circ}\text{C}$ , the reaction mixture was warmed to  $23\text{ }^{\circ}\text{C}$ , kept at this temperature for 1 h, and added to a solution of pinacol (2.84 g, 24 mmol) in dry  $\text{CH}_2\text{Cl}_2$  (20 mL) at  $-78\text{ }^{\circ}\text{C}$ . The resultant reaction mixture was warmed to  $23\text{ }^{\circ}\text{C}$ , stirred for 1 h, washed with brine, and dried over  $\text{Na}_2\text{SO}_4$ . After evaporation of the solvent, the residue was purified by column chromatography (silica gel, 50:1 hexane-EtOAc) to give 4.20 g (85%) of the title compound as colorless liquid. The above obtained compound **2** are  $\geq 98\%$  pure determined by  $^1\text{H}$  and  $^{13}\text{C}$  NMR analysis. Compound **2** is very stable and can be stored in air at  $23^{\circ}\text{C}$  for days without any change according to NMR analysis.  $^1\text{H}$  NMR (400 MHz,  $\text{CDCl}_3$ ):  $\delta$  1.25 (s, 12 H,  $\text{CH}_3$ ), 2.38 (s, 3H,  $\text{CH}_3$ ), 5.82 (s, 1H,  $=\text{CH}$ );  $^{13}\text{C}$  NMR (100 MHz,  $\text{CDCl}_3$ ):  $\delta$  24.66, 32.93, 83.47, 119.25, 139.33; HRMS calcd for  $\text{C}_9\text{H}_{16}\text{BBro}_2$   $[\text{M}]^+$ : 246.0427. Found 246.0426.

### General procedure A: Negishi cross-coupling of alkyl-, alkenyl-, and arylzinc bromides with (Z)-2-(2'-Bromo-1-propenyl)-4,4,5,5-tetramethyl-1,3,2-dioxaborolane (**2**)

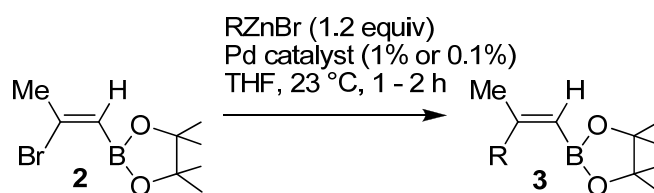

To a stirred solution of **2** (0.25 g, 1 mmol) and  $\text{PdCl}_2(\text{PPh}_3)_2$  (7 mg, 0.01 mmol) in dry THF (2 mL) was added a solution of organozinc reagent (1.2 mmol) at  $0^{\circ}\text{C}$ . The resultant reaction mixture was stirred at  $23^{\circ}\text{C}$  for 1 h, quenched with 0.5 M HCl, extracted with ether, washed successively with saturated  $\text{NaHCO}_3$  and brine, dried over  $\text{MgSO}_4$ , filtered, and concentrated. Flash chromatography (silica gel, 50:1 hexane-EtOAc) afforded the compounds **3**, which are  $\geq 98\%$  pure determined by  $^1\text{H}$  and  $^{13}\text{C}$  NMR analysis.

**(Z)-2-(2'-methyl-1-octenyl)-4,4,5,5-tetramethyl-1,3,2-dioxaborolane (3i)**

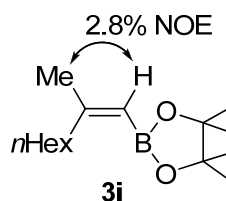

General procedure A starting from **2** (0.25 g, 1 mmol), PdCl<sub>2</sub>(PPh<sub>3</sub>)<sub>2</sub> (7 mg, 0.01 mmol) and *n*-hexylzinc bromide (1.2 mmol, generated by treating *n*-hexyllithium (0.52 mL, 1.2 mmol, 2.3 M solution in hexanes) with a solution of ZnBr<sub>2</sub> (0.27 g, 1.2 mmol) in dry THF (2 mL) for 30 min at 0°C) gave the title compound as colorless oil. Yield: 0.24 g (87%); <sup>1</sup>H NMR (300 MHz, CDCl<sub>3</sub>) δ 0.87 (t, *J* = 6.6 Hz, 3H), 1.2-1.35 (m, 6H), 1.23 (s, 12H), 1.35-1.45 (m, 2H), 1.83 (d, *J* = 1.2 Hz, 3H), 2.38 (t, *J* = 7.2 Hz, 2H), 5.10 (q, *J* = 1.5 Hz, 1H); <sup>13</sup>C NMR (75 MHz, CDCl<sub>3</sub>) δ 14.05, 22.57, 24.74(4C), 26.35, 28.79, 28.94, 31.62, 35.90, 82.37(2C), 113-116(br s), 163.66. HRMS calcd for C<sub>15</sub>H<sub>29</sub>BO<sub>2</sub> [M]<sup>+</sup>: 252.2261 Found 252.2268.

**(Z)-2-(2,4-dimethyl-1-pentenyl)-4,4,5,5-tetramethyl-1,3,2-dioxaborolane (3ii)**

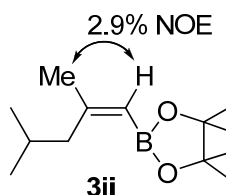

General procedure A starting from **2** (0.25 g, 1 mmol), PdCl<sub>2</sub>(PPh<sub>3</sub>)<sub>2</sub> (7 mg, 0.01 mmol) and *i*-butylzinc bromide (1.2 mmol, generated by treating *i*-butylmagnesium bromide (0.6 mL, 1.2 mmol, 2.0 M solution in Et<sub>2</sub>O) with a solution of ZnBr<sub>2</sub> (0.27 g, 1.2 mmol) in dry THF (2 mL) for 30 min at 0°C) gave the title compound as colorless oil. Yield: 0.193 g (86%); <sup>1</sup>H NMR (300 MHz, CDCl<sub>3</sub>) δ 0.85 (t, *J* = 6.6 Hz, 3H), 1.22 (s, 12H), 1.7-1.8 (m, 1H), 1.80 (d, *J* = 1.5 Hz, 3H), 2.73 (d, *J* = 7.5 Hz, 2H), 5.13 (q, *J* = 1.2 Hz, 1H); <sup>13</sup>C NMR (75 MHz, CDCl<sub>3</sub>) δ 22.34(2C), 24.70(4C), 26.59, 27.09, 44.87, 82.34(2C), 113-117(br s), 162.13. HRMS calcd for C<sub>13</sub>H<sub>25</sub>BO<sub>2</sub> [M]<sup>+</sup>: 224.1948 Found 224.1958.

**(Z)-2-(2'-cyclohexyl-1-propenyl)-4,4,5,5-tetramethyl-1,3,2-dioxaborolane (3iii)**

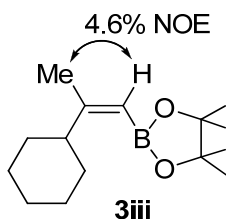

General procedure A starting from **2** (0.25 g, 1 mmol), PdCl<sub>2</sub>(PPh<sub>3</sub>)<sub>2</sub> (7 mg, 0.01 mmol) and cyclohexylzinc bromide (1.2 mmol, generated by treating cyclohexylmagnesium

bromide (0.6 mL, 1.2 mmol, 2.0 M solution in Et<sub>2</sub>O) with a solution of ZnBr<sub>2</sub> (0.27 g, 1.2 mmol) in dry THF (2 mL) for 30 min at 0°C gave the title compound as colorless oil. Yield: 0.21 g (84%); <sup>1</sup>H NMR (300 MHz, CDCl<sub>3</sub>) δ 1.1-1.35 (m, 5H), 1.24 (s, 12H), 1.5-1.55 (m, 2H), 1.6-1.8 (m, 3H), 1.76 (d, *J* = 1.5 Hz, 3H), 2.98 (tt, *J*<sub>1</sub> = 3.3 Hz, *J*<sub>2</sub> = 11.8 Hz, 1H), 5.03 (q, *J* = 1.5 Hz, 1H); <sup>13</sup>C NMR (75 MHz, CDCl<sub>3</sub>) δ 22.33, 24.72(4C), 26.20, 26.48(2C), 31.97(2C), 43.71, 82.35(2C), 111-115(br s), 167.93. HRMS calcd for C<sub>15</sub>H<sub>27</sub>BO<sub>2</sub> [M]<sup>+</sup>: 250.2142 Found 250.2143.

**(Z)-2-(2,5-dimethyl-1,4-hexadienyl)-4,4,5,5-tetramethyl-1,3,2-dioxaborolane (3iv)**

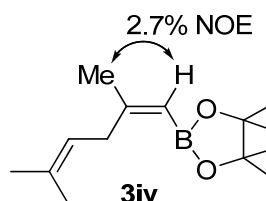

General procedure A starting from **2** (0.25 g, 1 mmol), PdCl<sub>2</sub>(PPh<sub>3</sub>)<sub>2</sub> (7 mg, 0.01 mmol) and (3-methyl-2-butenyl)zinc bromide (1.2 mmol, generated by treating 1-bromo-3-methyl-2-butene (0.18 g, 0.14 mL, 1.2 mmol) with Zn dust (0.156 g, 2.4 mmol) in dry THF (2 mL))<sup>[vi]</sup> gave the title compound as colorless oil. Yield: 0.187 g (79%); <sup>1</sup>H NMR (300 MHz, CDCl<sub>3</sub>) δ 1.25(s, 12H), 1.68 (s, 3H), 1.70 (s, 3H), 1.83 (s, 3H), 3.12 (d, *J* = 7.6 Hz, 2H), 3.09 (s, 1H), 5.1-5.2 (m, 1H); <sup>13</sup>C NMR (75 MHz, CDCl<sub>3</sub>) δ 17.69, 24.69(4C), 25.73, 26.15, 35.22, 82.45(2C), 112-116(br s), 122.40, 132.31, 162.44. HRMS calcd for C<sub>14</sub>H<sub>25</sub>BO<sub>2</sub> [M]<sup>+</sup>: 236.1948 Found 236.1961.

**(Z)-2-(2-methyl-3-phenyl-1-propenyl)-4,4,5,5-tetramethyl-1,3,2-dioxaborolane (3v)**

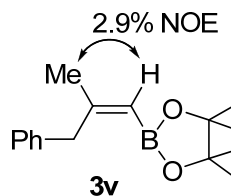

General procedure A starting from **2** (0.25 g, 1 mmol), PdCl<sub>2</sub>(PPh<sub>3</sub>)<sub>2</sub> (7 mg, 0.01 mmol) and benzylzinc bromide (1.2 mmol, generated by treating benzyl bromide (0.20 g, 0.14 mL, 1.2 mmol) with Zn dust (0.156 g, 2.4 mmol) in dry THF (2 mL))<sup>[vi]</sup> gave the title compound as colorless oil. Yield: 0.214 g (83%); <sup>1</sup>H NMR (300 MHz, CDCl<sub>3</sub>) δ 1.29 (s, 12H), 1.76 (s, 3H), 3.76 (s, 2H), 5.25 (s, 1H), 7.1-7.25 (m, 5H); <sup>13</sup>C NMR (75 MHz, CDCl<sub>3</sub>) δ 24.77(4C), 26.00, 42.28, 82.68(2C), 115-117(br s), 125.84, 128.16(2C), 128.80(2C), 140.29, 161.15. HRMS calcd for C<sub>16</sub>H<sub>23</sub>BO<sub>2</sub> [M]<sup>+</sup>: 258.1791 Found 258.1783.



**(Z)-2-(2,6-dimethyl-1,5-heptadienyl)-4,4,5,5-tetramethyl-1,3,2-dioxaborolane (3vi)**

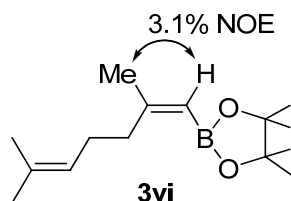

General procedure A starting from **2** (0.25 g, 1 mmol), PdCl<sub>2</sub>(PPh<sub>3</sub>)<sub>2</sub> (7 mg, 0.01 mmol) and (4-methyl-3-pentenyl)zinc bromide (1.2 mmol, generated by treating 2-iodo-2-methyl-2-pentene (0.25 g, 1.2 mmol) with *t*-BuLi (1.47 mL, 2.5 mmol, 1.7 M solution in pentane) in dry Et<sub>2</sub>O (2 mL) for 30 min at -78°C, followed by treating with ZnBr<sub>2</sub> (0.27 g, 1.2 mmol) for 30 min at 0°C)<sup>[vii]</sup> gave the title compound as colorless oil. Yield: 0.183 g (73%); <sup>1</sup>H NMR (400 MHz, CDCl<sub>3</sub>): δ 1.21 (s, 12H), 1.58 (s, 3H), 1.64 (s, 3H), 1.82 (s, 3H), 2.06 (q, *J* = 8 Hz, 2H), 2.37 (t, *J* = 8 Hz, 2H), 5.10 (m, 2H); <sup>13</sup>C NMR (100 MHz, CDCl<sub>3</sub>): δ 17.51, 24.71(4C), 25.63, 26.46, 27.62, 36.14, 82.37, 114.0(br s), 124.16, 131.32, 162.91. HRMS calcd for C<sub>15</sub>H<sub>27</sub>BO<sub>2</sub> [M]<sup>+</sup>: 250.2104 Found 250.2118

**(Z)-2-(2-methyl-4-phenyl-1-butenyl)-4,4,5,5-tetramethyl-1,3,2-dioxaborolane (3vii)**

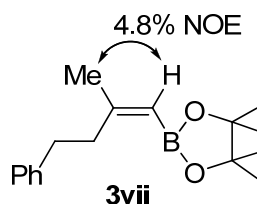

General procedure A starting from **2** (0.25 g, 1 mmol), PdCl<sub>2</sub>(PPh<sub>3</sub>)<sub>2</sub> (7 mg, 0.01 mmol) and phenethylzinc bromide (1.2 mmol, generated by treating (2-iodoethyl)benzene (0.28 g, 1.2 mmol) with *t*-BuLi (1.47 mL, 2.5 mmol, 1.7 M solution in pentane) in dry Et<sub>2</sub>O (2 mL) for 30 min at -78°C, followed by treating with ZnBr<sub>2</sub> (0.27 g, 1.2 mmol) for 30 min at 0°C)<sup>[vii]</sup> gave the title compound as colorless oil. Yield: 0.207 g (76%); <sup>1</sup>H NMR (400 MHz, CDCl<sub>3</sub>): δ 1.31 (s, 12 H), 1.97 (s, 3H), 2.80 (m, 4H), 5.24 (s, 1H), 7.20 (m, 1H), 7.30 (m, 4H); <sup>13</sup>C NMR (100 MHz, CDCl<sub>3</sub>): δ 24.75(4C), 26.65, 35.82, 38.28, 82.42, 114.0(br s), 125.55, 128.06(2C), 128.37(2C), 142.27, 162.53. HRMS calcd for C<sub>17</sub>H<sub>25</sub>BO<sub>2</sub> [M]<sup>+</sup>: 272.1948 Found 272.1971.

**(Z)-2-(2-methyl-1-dedecen-5-ynyl)-4,4,5,5-tetramethyl-1,3,2-dioxaborolane (3viii)**

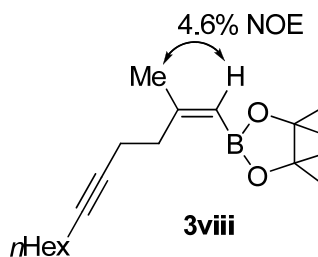

General procedure A starting from **2** (0.25 g, 1 mmol), PdCl<sub>2</sub>(PPh<sub>3</sub>)<sub>2</sub> (7 mg, 0.01 mmol) and 3-decynylzinc bromide (1.2 mmol, generated by treating 2-iodo-3-decyne (0.37 g, 1.2 mmol) with *t*-BuLi (1.47 mL, 2.5 mmol, 1.7 M solution in pentane) in dry Et<sub>2</sub>O (2 mL) for 30 min at -78°C, followed by treating with ZnBr<sub>2</sub> (0.27 g, 1.2 mmol) for 30 min at 0°C)<sup>[vii]</sup> gave the title compound as colorless oil. Yield: 0.198 (79%); <sup>1</sup>H NMR (400 MHz, CDCl<sub>3</sub>): δ 0.86 (t, *J* = 6.8 Hz, 3H), 1.22-1.36 (m, 20H), 1.40 (m, 2H), 1.87 (s, 3H), 2.10 (m, 2H), 2.25 (m, 2H), 2.54 (t, *J* = 7.6 Hz, 2H), 5.14 (s, 1H); <sup>13</sup>C NMR (100 MHz, CDCl<sub>3</sub>): δ 14.00, 18.74(2C), 22.52, 24.71(4C), 26.64, 28.48, 29.04, 31.33, 35.34, 79.68, 80.44, 82.49, 115.0(br s), 161.56. HRMS calcd for C<sub>19</sub>H<sub>33</sub>BO<sub>2</sub> [M]<sup>+</sup>: 304.2574 Found 304.2559.

**(Z)-2-(2'-methyl-1,3-butadienyl)-4,4,5,5-tetramethyl-1,3,2-dioxaborolane (3ix)**

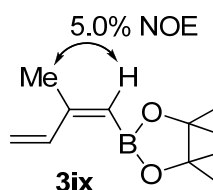

General procedure A starting from **2** (0.25 g, 1 mmol), 0.1% Pd(*t*-Bu<sub>3</sub>P)<sub>2</sub> (0.1 mL, 0.01 M solutions in THF, 0.001mmol) and vinylzinc bromide (1.2 mmol, generated by treating vinylmagnesium bromide (1.2 mL, 1.2 mmol, 1.0 M solution in THF) with a solution of ZnBr<sub>2</sub> (0.27 g, 1.2 mmol) in dry THF (2 mL) for 30 min at 0°C) gave the title compound as colorless oil. Yield: 0.16 (82%); <sup>1</sup>H NMR (300 MHz, CDCl<sub>3</sub>) δ 1.28 (s, 12H), 1.99 (d, *J* = 1.5 Hz, 1H), 5.24 (dt, *J*<sub>1</sub> = 1.5 Hz, *J*<sub>2</sub> = 7.5 Hz, 1H), 5.36 (q, *J* = 1.5 Hz, 1H), 5.37(dd, *J*<sub>1</sub> = 1.2 Hz, *J*<sub>2</sub> = 17.7 Hz, 1H), 7.32 (dd, *J*<sub>1</sub> = 7.8 Hz, *J*<sub>2</sub> = 17.7) Hz, 1H); <sup>13</sup>C NMR (75 MHz, CDCl<sub>3</sub>) δ 21.91, 24.81(4C), 82.92(2C), 116.51, 118-122(br s), 137.86, 155.35. HRMS calcd for C<sub>11</sub>H<sub>19</sub>BO<sub>2</sub> [M]<sup>+</sup>: 194.1478 Found 194.1499.

**(Z)-4,4,5,5-tetramethyl-2-((1Z,3E)-2-methyl-1,3-decadienyl)-1,3,2-dioxaboralane (3x)**

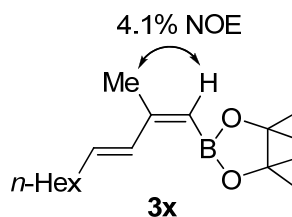

General procedure A starting from **2** (0.25 g, 1 mmol), PdCl<sub>2</sub>(PPh<sub>3</sub>)<sub>2</sub> (7 mg, 0.01 mmol) and (*E*)-1-octenylzinc bromide (1.2 mmol, generated by treating (*E*)-(1-iodo-1-octene (0.30 g, 1.2 mmol) with *n*-BuLi (0.53 mL, 1.3 mmol, 2.5 M solution in hexanes) in dry THF (2 mL) for 30 min at -78°C, followed by treating with ZnBr<sub>2</sub> (0.27 g, 1.2 mmol) for 30 min at 0°C) gave the title compound as colorless oil. Yield: 0.267 g (96%). <sup>1</sup>H NMR

(400 MHz, CDCl<sub>3</sub>)  $\delta$  0.87 (t,  $J$  = 7.2 Hz, 3H), 1.2-1.3 (m, 18H), 1.3-1.4 (m, 2H), 1.94 (s, 3H), 2.1-2.25 (m, 2H), 5.84 (dt,  $J$  = 15.6, 6.8 Hz, 1H), 7.00 (d,  $J$  = 16, 1H); <sup>13</sup>C NMR (100 MHz, CDCl<sub>3</sub>)  $\delta$  14.00, 22.52, 22.72, 24.72(4C), 28.85, 28.99, 31.68, 32.91, 82.63(2C), 114-116(br s), 131.21, 135.18, 155.59; HRMS calcd for C<sub>18</sub>H<sub>33</sub>BO<sub>2</sub> [M]<sup>+</sup>: 278.2417 Found 278.2411.

**2-((1Z,3E)-2,4-dimethyl-1,3-decadienyl)-4,4,5,5-tetramethyl-1,3,2-dioxaborolane (3xi)**

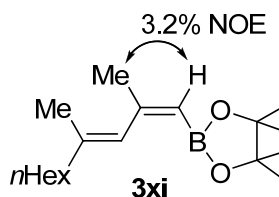

General procedure A starting from **2** (0.25 g, 1 mmol), 0.1% Pd(*t*-Bu<sub>3</sub>P)<sub>2</sub> (0.1 mL, 0.01 M solutions in THF, 0.001mmol) and (*E*)-(2-methyl-1-octenyl)zinc bromide (1.2 mmol, generated by treating (*E*)-(1-iodo-2-methyl-1-octene (0.30 g, 1.2 mmol) with *n*-BuLi (0.53 mL, 1.3 mmol, 2.5 M solution in hexanes) in dry THF (2 mL) for 30 min at -78°C, followed by treating with ZnBr<sub>2</sub> (0.27 g, 1.2 mmol) for 30 min at 0°C) gave the title compound as colorless oil. Yield: 0.24 g (83%); <sup>1</sup>H NMR (300 MHz, CDCl<sub>3</sub>)  $\delta$  0.89 (t,  $J$  = 6.9 Hz, 3H), 1.2-1.4 (m, 6H), 1.24 (s, 12H), 1.4-1.5 (m, 2H), 1.74 (d,  $J$  = 1.2 Hz, 3H), 2.00 (d,  $J$  = 1.5 Hz, 3H), 2.04 (t,  $J$  = 6.9 Hz, 2H), 5.20 (q,  $J$  = 1.5 Hz, 1H), 6.27 (q,  $J$  = 1.5 Hz, 1H); <sup>13</sup>C NMR (75 MHz, CDCl<sub>3</sub>)  $\delta$  14.08, 18.17, 22.57, 24.84(4C), 27.39, 27.75, 28.96, 31.80, 41.03, 82.49(2C), 116-119(br s), 126.46, 139.13, 157.21; HRMS calcd for C<sub>18</sub>H<sub>33</sub>BO<sub>2</sub> [M]<sup>+</sup>: 292.2574 Found 292.2559.

**(2E,4Z)-4-methyl-5-(4,4,5,5-tetramethyl-1,3,2-dioxaborolan-2-yl)penta-2,4-dien-1-ol (3xii)**

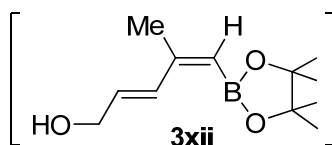

Compound **3xi** was generated from **1** and was used for synthesis of **4xi** without further purification. Experimental details are illustrated in the procedure for synthesizing **4xi** at page S13.

***tert*-Butyldimethyl((*2E,5Z*)-5-methyl-6-(4,4,5,5-tetramethyl-1,3,2-dioxaborolan-2-yl)-2,5-hexadienyloxysilane (3xiii)**

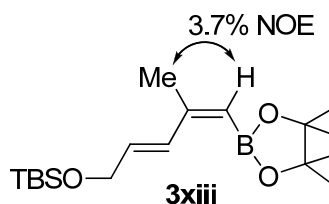

General procedure A starting from **2** (0.25 g, 1 mmol), PdCl<sub>2</sub>(PPh<sub>3</sub>)<sub>2</sub> (7 mg, 0.01 mmol) and (*E*)-(3-(*tert*-butyldimethylsilyloxy)-1-propenyl)zinc bromide (1.2 mmol, generated by treating (*E*)-*tert*-butyl(3-iodoallyloxy)dimethylsilane (0.358 g, 1.2 mmol) with *n*BuLi (0.53 mL, 1.3 mmol, 2.5 M solution in hexanes) in dry THF (2 mL) for 30 min at -78°C, followed by treating with ZnBr<sub>2</sub> (0.27 g, 1.2 mmol) for 30 min at 0°C) gave the title compound as colorless oil. Yield: 0.31 g (90%); <sup>1</sup>H NMR (400 MHz, CDCl<sub>3</sub>): δ 0.10 (s, 6H), 0.92 (s, 9H), 1.26 (s, 12 H), 1.97 (s, 3H), 4.30 (m, 2H), 5.28 (s, 1H), 5.91 (dt *J*<sub>1</sub> = 4.8 Hz, *J*<sub>2</sub> = 16 Hz, 1H), 7.22 (d *J* = 16 Hz, 1H); <sup>13</sup>C NMR (100 MHz, CDCl<sub>3</sub>): δ -5.21(2C), 18.43, 22.89, 24.79(4C), 26.03(3C), 63.75, 82.82, 124.0(br s), 130.55, 132.13, 154.86. HRMS calcd for C<sub>18</sub>H<sub>35</sub>BO<sub>3</sub>Si [M]<sup>+</sup>: 338.2449 Found 338.2443.

**(*Z*)-2-(2'-phenyl-1-propenyl)-4,4,5,5-tetramethyl-1,3,2-dioxaborolane (3xiv)**

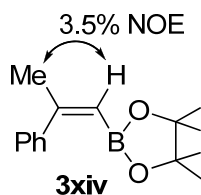

General procedure A starting from **2** (0.25 g, 1 mmol), PdCl<sub>2</sub>(PPh<sub>3</sub>)<sub>2</sub> (7 mg, 0.01 mmol) and phenylzinc bromide (1.2 mmol, generated by treating phenylmagnesium bromide (0.4 mL, 1.2 mmol, 3.0 M solution in Et<sub>2</sub>O) with a solution of ZnBr<sub>2</sub> (0.27 g, 1.2 mmol) in dry THF (2 mL) for 30 min at 0°C) gave the title compound as colorless oil. Yield: 0.21 g (86%); <sup>1</sup>H NMR (300 MHz, CDCl<sub>3</sub>) δ 1.17 (s, 12H), 2.24 (d, *J* = 1.2 Hz, 3H), 5.50 (q, *J* = 1.2 Hz, 3H), 7.25-7.35 (m, 5H); <sup>13</sup>C NMR (75 MHz, CDCl<sub>3</sub>) δ 24.50(4C), 27.63, 82.83(2C), 115-119(br s), 127.32, 127.46(4C), 143.01, 157.54. HRMS calcd for C<sub>15</sub>H<sub>21</sub>BO<sub>2</sub> [M]<sup>+</sup>: 244.1635 Found 244.1648.

**(Z)-2-(2'-(4-methoxyphenyl)-1-propenyl)-4,4,5,5-tetramethyl-1,3,2-dioxaborolane (3xv)**

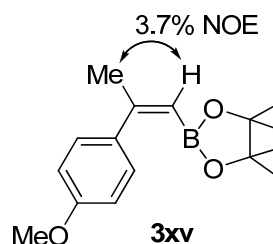

General procedure A starting from **2** (0.25 g, 1 mmol), PdCl<sub>2</sub>(PPh<sub>3</sub>)<sub>2</sub> (7 mg, 0.01 mmol) and 4-methoxyphenylzinc bromide (1.2 mmol, generated by treating 4-methoxyphenylmagnesium bromide (2.4 mL, 1.2 mmol, 0.5 M solution in THF) with a solution of ZnBr<sub>2</sub> (0.27 g, 1.2 mmol) in dry THF (2 mL) for 30 min at 0°C) gave the title compound as colorless oil. Yield: 0.249 g (87%); <sup>1</sup>H NMR (300 MHz, CDCl<sub>3</sub>) δ 1.18 (s, 12H), 2.20 (d, *J* = 1.2 Hz, 3H), 3.79 (s, 3H), 5.41 (q, *J* = 1.2 Hz, 1H), 6.82 (d, *J* = 8.7 Hz, 2H), 7.75 (d, *J* = 8.7 Hz, 2H); <sup>13</sup>C NMR (75 MHz, CDCl<sub>3</sub>) δ 24.48(4C), 27.57, 55.02, 82.74(2C), 112.70(2C), 115-117(br s), 128.74(2C), 135.25, 156.92, 159.04. HRMS calcd for C<sub>16</sub>H<sub>23</sub>BO<sub>3</sub> [M]<sup>+</sup>: 274.1740 Found 274.1765.

**(Z)-2-(2'-(4-chlorophenyl)-1-propenyl)-4,4,5,5-tetramethyl-1,3,2-dioxaborolane (3xvi)**

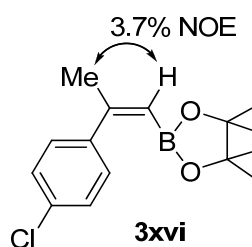

General procedure A starting from **2** (0.25 g, 1 mmol), PdCl<sub>2</sub>(PPh<sub>3</sub>)<sub>2</sub> (7 mg, 0.01 mmol) and 4-chlorophenylzinc bromide (1.2 mmol, generated by treating 4-chlorophenylmagnesium bromide (1.2 mL, 1.2 mmol, 1.0 M solution in Et<sub>2</sub>O) with a solution of ZnBr<sub>2</sub> (0.27 g, 1.2 mmol) in dry THF (2 mL) for 30 min at 0°C) gave the title compound as colorless oil. Yield: 0.24 g (85%); <sup>1</sup>H NMR (300 MHz, CDCl<sub>3</sub>) δ 1.16 (s, 12H), 2.19 (d, *J* = 1.2 Hz, 3H), 5.49 (q, *J* = 1.2 Hz, 1H), 7.25 (s, 4H); <sup>13</sup>C NMR (75 MHz, CDCl<sub>3</sub>) δ 24.54(4C), 27.67, 82.99(2C), 116-120(br), 127.61(2C), 128.94(2C), 133.00, 141.40, 156.44. HRMS calcd for C<sub>15</sub>H<sub>20</sub>BO<sub>2</sub>Cl [M]<sup>+</sup>: 278.1245 Found 278.1255.

**(Z)-2-(2'-methyl-1-octen-3-ynyl)-4,4,5,5-tetramethyl-1,3,2-dioxaborolane (3xvii)**

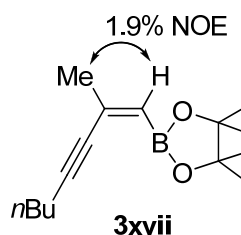

General procedure A starting from **2** (0.25 g, 1 mmol), PdCl<sub>2</sub>(PPh<sub>3</sub>)<sub>2</sub> (7 mg, 0.01 mmol) and 1-hexynylzinc bromide (1.2 mmol, generated by treating 1-hexyne (0.10 g, 1.2 mmol) with *n*-BuLi (0.53 mL, 1.3 mmol, 2.5 M solution in hexanes) in dry THF (2 mL) for 30 min at -78°C, followed by treating with ZnBr<sub>2</sub> (0.27 g, 1.2 mmol) for 30 min at 0°C) gave the title compound as colorless oil. Yield: 0.21 g (83%); <sup>1</sup>H NMR (300 MHz, CDCl<sub>3</sub>) δ 0.91 (t, *J* = 7.2 Hz, 3H), 1.25 (s, 12H), 1.35-1.6 (m, 4H), 1.96 (d, *J* = 1.5 Hz, 3H), 2.34 (t, *J* = 6.9 Hz, 3H), 5.49 (q, *J* = 1.5 Hz, 1H); <sup>13</sup>C NMR (75 MHz, CDCl<sub>3</sub>) δ 13.59, 19.24, 21.83, 24.75(4C), 27.74, 30.59, 81.76, 82.91(2C), 94.64, 139.26. HRMS calcd for C<sub>15</sub>H<sub>25</sub>BO<sub>2</sub> [M]<sup>+</sup>: 248.1948 Found 248.1933.

**(Z)-2-(4-(tert-butyldimethylsilyl)-2-methylbut-1-en-3-ynyl)-4,4,5,5-tetramethyl-1,3,2-dioxaborolane (3xviii)**

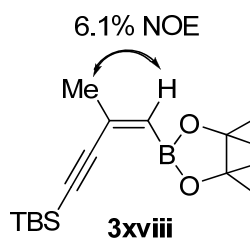

General procedure A starting from **2** (0.50 g, 2 mmol), 0.1% Pd(*t*-Bu<sub>3</sub>P)<sub>2</sub> (0.1 mL, 0.01 M solutions in THF, 0.001mmol) and ((*tert*-butyldimethylsilyl)ethynyl)zinc bromide (3.0 mmol, generated by treating (*tert*-butyldimethylsilyl)ethyne (0.42 g, 3.0 mmol) with *n*-BuLi (1.2 mL, 3.0 mmol, 2.5 M solution in hexanes) in dry THF (4 mL) for 30 min at -78°C, followed by treating with ZnBr<sub>2</sub> (0.676 g, 3.0 mmol) for 30 min at 0°C) gave the title compound as colorless oil. Yield: 0.551 g (90%); <sup>1</sup>H NMR (400 MHz, CDCl<sub>3</sub>) δ 0.10 (s, 6H), 0.94 (s, 9H), 1.22 (s, 12H), 1.97 (s, 3H), 5.56 (s, 1H); <sup>13</sup>C NMR (100 MHz, CDCl<sub>3</sub>) δ -4.75, 16.62, 24.75, 26.10, 27.56, 83.00, 96.63, 106.25, 126.02, 138.23. HRMS calcd for C<sub>17</sub>H<sub>31</sub>BO<sub>2</sub>Si [M]<sup>+</sup>: 306.2186 Found 306.2153.

**General procedure B for iodolysis of boronates<sup>[viii]</sup>**

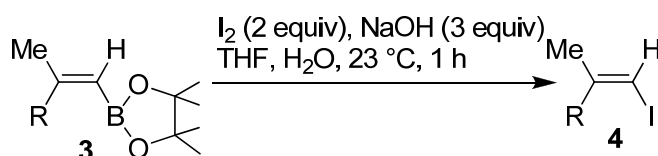

To a stirred solution of boronate **3** (0.5 mmol) in THF (1 mL) was added a solution of NaOH (0.5 mL, 1.5 mmol, 3 M in water). The resultant mixture was stirred for 10 min at 23°C, followed by dropwise addition of a solution of I<sub>2</sub> (0.25 g, 1 mmol) in THF (5 mL). After 1 h at 23°C, the reaction mixture was quenched with aqueous Na<sub>2</sub>S<sub>2</sub>O<sub>3</sub>, extracted with ether, washed successively with saturated NaHCO<sub>3</sub> and brine, dried over Na<sub>2</sub>SO<sub>4</sub>, filtered, and concentrated. Flash chromatography (silica gel, hexanes, for case of **4xii**, hexane-EtOAc 100:1 was used; for case of **4xv**, hexane-EtOAc 50:1 was used;) afforded the compounds **4**, which are ≥ 98% pure determined by <sup>1</sup>H and <sup>13</sup>C NMR analysis..

**(Z)-1-iodo-2-methyl-1-octene (4i)**

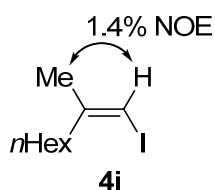

General procedure B starting from **3i** (0.13 g, 0.5 mmol), NaOH (0.5 mL, 1.5 mmol, 3 M in water) and I<sub>2</sub> (0.25 g, 1 mmol) gave the title compound as colorless oil. Yield: 0.11 g (86%); <sup>1</sup>H NMR (300 MHz, CDCl<sub>3</sub>) δ 0.90 (t, *J* = 7.2 Hz, 3H), 1.25-1.5 (m, 8H), 1.88 (d, *J* = 1.5 Hz, 3H), 2.20 (t, *J* = 7.2 Hz, 2H), 5.82 (q, *J* = 1.5 Hz, 1H); <sup>13</sup>C NMR (75 MHz, CDCl<sub>3</sub>) δ 14.08, 22.59, 23.25, 26.90, 28.96, 31.68, 38.64, 73.77, 147.80.

**(Z)-1-iodo-2,3-dimethyl-1-butene (4ii)**

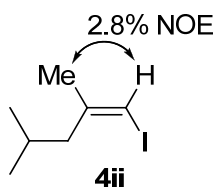

General procedure B starting from **3ii** (0.11 g, 0.5 mmol), NaOH (0.5 mL, 1.5 mmol, 3 M in water) and I<sub>2</sub> (0.25 g, 1 mmol) gave the title compound as colorless oil. Yield: 0.09 g (82%); <sup>1</sup>H NMR (400 MHz, CDCl<sub>3</sub>): δ 0.93 (d, *J* = 6.8 Hz, 6 H); 1.86 (s, 3H); 1.90 (m, 1H); 2.12 (d, *J* = 7.2 Hz, 2H); 5.90 (s, 1H); <sup>13</sup>C NMR (100 MHz, CDCl<sub>3</sub>): δ 22.22(C), 23.75, 26.65, 47.09, 75.16, 146.66. HRMS calcd for C<sub>7</sub>H<sub>13</sub>I [M]<sup>+</sup>: 224.0062 Found 224.0062.

**(Z)-(1-iodo-1-propen-2-yl)cyclohexane (4iii)**

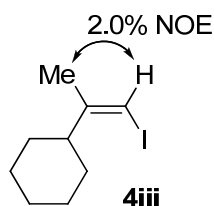

General procedure B starting from **3iii** (0.13 g, 0.5 mmol), NaOH (0.5 mL, 1.5 mmol, 3 M in water) and I<sub>2</sub> (0.25 g, 1 mmol) gave the title compound as colorless oil. Yield: 0.11 g (88%); <sup>1</sup>H NMR (300 MHz, CDCl<sub>3</sub>) δ 1.1-1.45 (m, 5H), 1.55-1.65 (m, 2H), 1.65-1.85 (m, 3H), 1.78 (d, *J* = 1.5 Hz, 3H), 2.54 (tt, *J*<sub>1</sub> = 3.0 Hz, *J*<sub>2</sub> = 11.7 Hz, 1H), 5.76 (q, *J* = 1.5 Hz, 1H); <sup>13</sup>C NMR (75 MHz, CDCl<sub>3</sub>) δ 20.14, 26.01, 26.14(2C), 29.93(2C), 46.57, 73.91, 151.11. HRMS calcd for C<sub>9</sub>H<sub>15</sub>I [M]<sup>+</sup>: 250.0218 Found 250.0199.

**(Z) 1-iodo-2,5-dimethyl-1,4-hexadiene (4iv)**

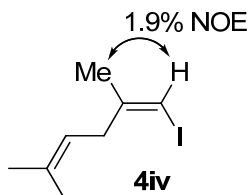

General procedure B starting from **3iv** (0.12 g, 0.5 mmol), NaOH (0.5 mL, 1.5 mmol, 3 M in water) and I<sub>2</sub> (0.25 g, 1 mmol) gave the title compound as colorless oil. Yield: 0.10 g (84%); <sup>1</sup>H NMR (300 MHz, CDCl<sub>3</sub>) δ 1.70 (s, 3H), 1.72 (s, 3H), 1.85 (s, 3H), 2.91 (d, *J* = 6.9 Hz), 5.05-5.15 (m, 1H), 5.82 (s, 1H); <sup>13</sup>C NMR (75 MHz, CDCl<sub>3</sub>) δ 18.05, 23.17, 25.76, 37.91, 73.33, 119.69, 133.79, 147.03; HRMS calcd for C<sub>8</sub>H<sub>13</sub>I [M]<sup>+</sup>: 236.0062. Found 236.0061.

**(Z)-(3-iodo-2-methylallyl)benzene (4v)**

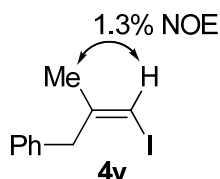

General procedure B starting from **3v** (0.13 g, 0.5 mmol), NaOH (0.5 mL, 1.5 mmol, 3 M in water) and I<sub>2</sub> (0.25 g, 1 mmol) gave the title compound as colorless oil. Yield: 0.10 g (81%); <sup>1</sup>H NMR (300 MHz, CDCl<sub>3</sub>) δ 1.85 (s, 3H), 3.62 (s, 2H), 6.07 (s, 1H), 7.2-7.4 (m, 5H); <sup>13</sup>C NMR (75 MHz, CDCl<sub>3</sub>) δ 23.07, 44.66, 75.54, 126.43, 128.46(2C), 128.53(2C), 138.17, 146.57. HRMS calcd for C<sub>10</sub>H<sub>11</sub>I [M]<sup>+</sup>: 257.9905. Found 257.9931.



**(Z)-1-iodo-2,6-dimethyl-1,5-heptadiene (4vi)**

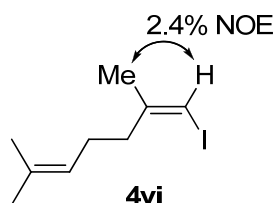

General procedure B starting from **3vi** (0.13 g, 0.5 mmol), NaOH (0.5 mL, 1.5 mmol, 3 M in water) and I<sub>2</sub> (0.25 g, 1 mmol) gave the title compound as colorless oil. Yield: 0.11 g (87%); <sup>1</sup>H NMR (400 MHz, CDCl<sub>3</sub>): δ 1.65 (s, 3 H), 1.70 (s, 3H), 2.10 (m, 2H), 2.25 (m, 2H), 5.15 (t, *J* = 5.0 Hz, 1H), 5.84 (s, 1H); <sup>13</sup>C NMR (100 MHz, CDCl<sub>3</sub>): δ 17.67, 23.41, 25.55, 25.68, 38.74, 123.19, 132.32; 147.29.

**(Z)-(4-iodo-3-methyl-3-butenyl)benzene (4vii)**

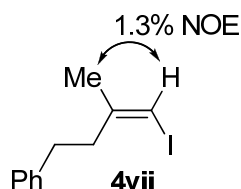

General procedure B starting from **3vii** (0.14 g, 0.5 mmol), NaOH (0.5 mL, 1.5 mmol, 3 M in water) and I<sub>2</sub> (0.25 g, 1 mmol) gave the title compound as colorless oil. Yield: 0.11 g (80%); <sup>1</sup>H NMR (400 MHz, CDCl<sub>3</sub>): δ 1.97 (s, 3H), 2.60 (m, 2H), 2.80 (m, 2H), 5.97 (s, 1H), 7.35 (m, 5H); <sup>13</sup>C NMR (100 MHz, CDCl<sub>3</sub>): δ 23.55, 33.14, 40.64, 74.91, 125.95, 128.30(2C), 128.32(2C), 141.17, 146.69; HRMS calcd for C<sub>11</sub>H<sub>13</sub>I [M]<sup>+</sup>: 272.0062. Found 272.0081.

**(Z)-1-iodo-2-methyl-1-dodecen-5-yne (4viii)**

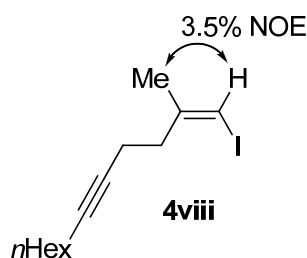

General procedure B starting from **3viii** (0.15 g, 0.5 mmol), NaOH (0.5 mL, 1.5 mmol, 3 M in water) and I<sub>2</sub> (0.25 g, 1 mmol) gave the title compound as colorless oil. Yield: 0.14 g (90%); <sup>1</sup>H NMR (400 MHz, CDCl<sub>3</sub>): δ 0.87 (t, *J* = 7.2 Hz, 3H), 1.26-1.40 (m, 6H), 1.45 (m, 2H), 1.90 (s, 3H), 2.11 (t, *J* = 2.0 Hz), 2.25 (m, 2H), 2.35 (m, 2H), 5.89 (s, 1H); <sup>13</sup>C NMR (100 MHz, CDCl<sub>3</sub>): δ 14.01, 16.60, 18.70, 22.51, 23.48, 28.48, 31.31, 37.98, 75.18, 78.63, 80.93, 146.07. C<sub>13</sub>H<sub>21</sub>I [M]<sup>+</sup>: 304.0688. Found 304.0660.

### (Z)-1-iodo-2-methyl-1,3-butadiene (4ix)

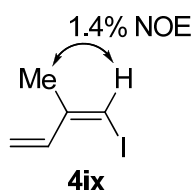

General procedure B starting from **3ix** (0.10 g, 0.5 mmol), NaOH (0.5 mL, 1.5 mmol, 3 M in water) and I<sub>2</sub> (0.25 g, 1 mmol) gave the title compound as colorless oil. Yield: 0.08 g (84%); <sup>1</sup>H NMR (300 MHz, CDCl<sub>3</sub>) δ 1.97 (d, *J* = 1.2 Hz, 3H), 5.32 (dt, *J*<sub>1</sub> = 1.2 Hz, *J*<sub>2</sub> = 9.6 Hz, 1H), 5.42 (dt, *J*<sub>1</sub> = 1.2 Hz, *J*<sub>2</sub> = 17.4 Hz, 1H), 6.68 (q, *J* = 1.2 Hz, 1H), 6.73 (ddd, *J*<sub>1</sub> = 1.2 Hz, *J*<sub>2</sub> = 11.1 Hz, *J*<sub>3</sub> = 17.1 Hz, 1H); <sup>13</sup>C NMR (75 MHz, CDCl<sub>3</sub>) δ 20.42, 79.92, 118.24, 138.20, 142.08.

### (1Z,3E)-1-iodo-2,4-dimethyl-1,3-decadiene (4xi)

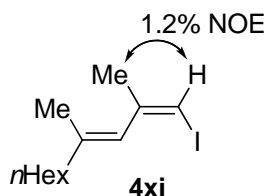

General procedure B starting from **3xi** (0.15 g, 0.5 mmol), NaOH (0.5 mL, 1.5 mmol, 3 M in water) and I<sub>2</sub> (0.25 g, 1 mmol) gave the title compound as colorless oil. Yield: 0.12 g (81%); <sup>1</sup>H NMR (300 MHz, CDCl<sub>3</sub>) δ 0.90 (t, *J* = 6.9 Hz, 3H), 1.25-1.4 (m, 6H), 1.4-1.55 (m, 2H), 1.68 (d, *J* = 1.2 Hz, 3H), 1.98 (d, *J* = 1.5 Hz, 3H), 2.08 (t, *J* = 7.5 Hz, 2H), 5.64 (q, *J* = 1.2 Hz, 1H), 5.98 (q, *J* = 1.5 Hz, 1H); <sup>13</sup>C NMR (75 MHz, CDCl<sub>3</sub>) δ 14.12, 17.93, 22.66, 24.64, 27.71, 28.89, 31.75, 39.86, 76.35, 126.52, 140.29, 145.29; HRMS calcd for. C<sub>12</sub>H<sub>21</sub>I [M]<sup>+</sup>: 292.0688. Found 292.0678.

### (2E,4Z)-5-iodo-4-methylpenta-2,4-dien-1-ol (4xii)

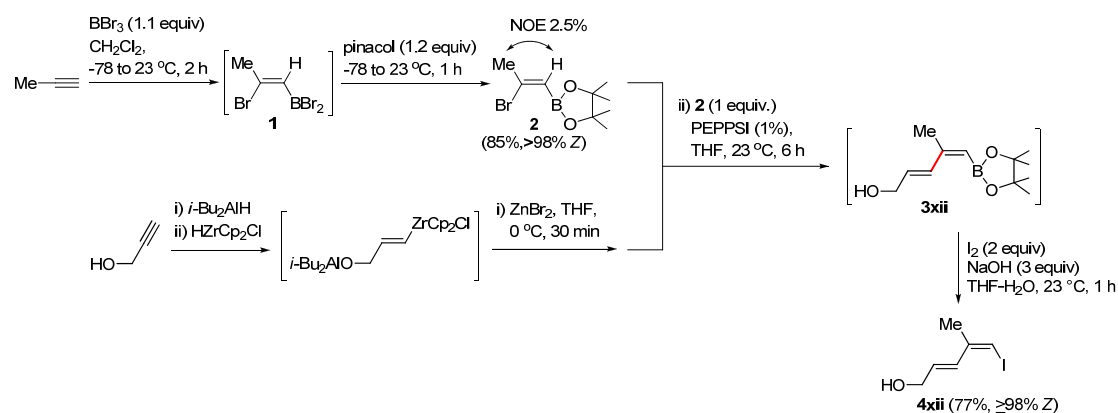

To ZrCp<sub>2</sub>Cl<sub>2</sub> (1.93 g, 6.6 mmol) in dry THF (6 mL) cooled to 0°C was added slowly a solution of *i*-Bu<sub>2</sub>AlH (6.6 mL, 6.6 mmol, 1 M solution in hexanes). The resultant

suspension was stirred for 30 min at 0°C, followed by addition of (3-butynyloxy)diisobutylaluminum (6 mmol) prepared by mixing propargyl alcohol (0.34 mL, 6.0 mmol) and *i*-Bu<sub>2</sub>AlH (6.0 mL, 6.0 mmol, 1 M solution in hexanes) in dry THF (6 mL) for 30 min at -78°C. The resultant mixture was warmed to room temperature and stirred 1h at 23°C, cooled to 0°C, followed by addition of a solution of ZnBr<sub>2</sub> (1.35 g, 6 mmol) in dry THF (6 mL). After 30 min at 0°C, a solution of (Z)-2-(2'-Bromo-1-propenyl)-4,4,5,5-tetramethyl-1,3,2-dioxaborolane (**2**) (4 mmol, prepared from propyne (0.16 g, 4.0 mmol) and BBr<sub>3</sub> (1.1 g, 4.4 mmol) in dry CH<sub>2</sub>Cl<sub>2</sub>) in dry THF (2 mL) and PEPPSI<sup>TM</sup>-IPr (41 mg, 0.06 mmol). After 6 h at 23°C, a solution of NaOH (0.72 g, 18 mmol) in water (4 mL) and I<sub>2</sub> (3.05 g, 12 mmol) was added. The mixture was stirred 2h at 23°C, quenched with 0.5 M HCl, extracted with ether, washed with saturated Na<sub>2</sub>S<sub>2</sub>O<sub>3</sub>, NaHCO<sub>3</sub> and brine, dried over MgSO<sub>4</sub>, filtered, and concentrated. Flash chromatography (silica gel, EtOAc–hexanes 1:2) afforded the title compound 0.69 g (77%), which is ≥ 98% pure determined by <sup>1</sup>H and <sup>13</sup>C NMR analysis. <sup>1</sup>H NMR (300 MHz, CDCl<sub>3</sub>) δ 1.98 (s, 3H), 4.29 (t, *J* = 5.4 Hz, 2H), 6.04 (dt, *J*<sub>1</sub> = 5.1 Hz, *J*<sub>2</sub> = 15.6 Hz, 1H), 6.16 (s, 1H), 6.64 (d, *J* = 15.6 Hz, 1H); <sup>13</sup>C NMR (100 MHz, CDCl<sub>3</sub>) δ 21.05, 62.93, 79.63, 131.97, 133.25, 141.14. HRMS calcd for. C<sub>6</sub>H<sub>9</sub>IO [M]<sup>+</sup>: 223.9698. Found 223.9678.

***tert*-Butyl((*2E,5Z*)-6-iodo-5-methyl-2,5-hexadienyloxy)dimethylsilane (**4xiii**)**

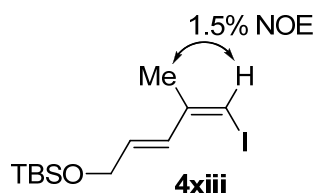

General procedure B starting from **3xiii** (0.17 g, 0.5 mmol), NaOH (0.5 mL, 1.5 mmol, 3 M in water) and I<sub>2</sub> (0.25 g, 1 mmol) gave the title compound as colorless oil. Yield: 0.14 g (84%); <sup>1</sup>H NMR (400 MHz, CDCl<sub>3</sub>): δ 0.11 (s, 6H), 0.95 (s, 9H), 1.96 (s, 3H), 4.30 (dd, *J*<sub>1</sub> = 1.2 Hz, *J*<sub>2</sub> = 4.4 Hz, 2H), 5.96 (dt, *J* = 4.8 Hz, *J* = 15.6 Hz, 1H), 6.09 (s, 1H), 6.67 (d, *J* = 15.2 Hz, 1H); <sup>13</sup>C NMR (100 MHz, CDCl<sub>3</sub>): δ -5.21(2C), 18.35, 21.08, 25.96(3C), 63.32, 78.76, 130.80, 133.87, 141.40.

**(*Z*)-(1-iodo-1-propen-2-yl)benzene (**4xiv**)**

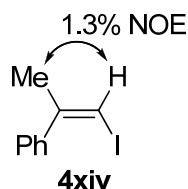

General procedure B starting from **3xiv** (0.12 g, 0.5 mmol), NaOH (0.5 mL, 1.5 mmol, 3 M in water) and I<sub>2</sub> (0.25 g, 1 mmol) gave the title compound as colorless oil. Yield: 0.11 g (86%); <sup>1</sup>H NMR (300 MHz, CDCl<sub>3</sub>) δ 2.26 (d, *J* = 1.2 Hz, 3H), 6.32 (q, *J* = 1.2 Hz,

1H), 7.25-7.35 (m, 2H), 7.35-7.45 (m, 3H); <sup>13</sup>C NMR (75 MHz, CDCl<sub>3</sub>) δ 26.52, 77.43, 127.35(2C), 127.59, 128.22(2C), 142.83, 148.19.

**(Z)-(1-iodo-1-propen-2-yl)-4-methoxybenzene (4xv)**

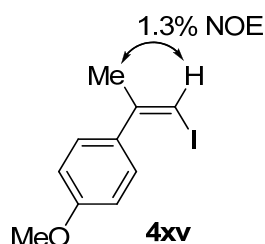

General procedure B starting from **3xv** (0.14 g, 0.5 mmol), NaOH (0.5 mL, 1.5 mmol, 3 M in water) and I<sub>2</sub> (0.25 g, 1 mmol) gave the title compound as colorless oil. Yield: 0.12 g (89%); <sup>1</sup>H NMR (300 MHz, CDCl<sub>3</sub>) δ 2.24 (d, *J* = 1.2 Hz, 3H), 3.86 (s, 3H), 6.26 (q, *J* = 1.2 Hz, 1H), 6.95 (d, *J* = 8.7 Hz, 2H), 7.28 (d, *J* = 8.7 Hz, 2H); <sup>13</sup>C NMR (75 MHz, CDCl<sub>3</sub>) δ 26.44, 55.12, 74.30, 113.42(2C), 128.64(2C), 134.80, 147.42, 158.84; HRMS calcd for. C<sub>10</sub>H<sub>11</sub>IO [M]<sup>+</sup>: 273.9855. Found 273.9878.

**(Z)-(1-iodo-1-propen-2-yl)-4-chlorobenzene (4xvi)**

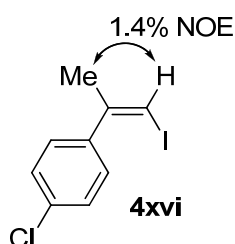

General procedure B starting from **3xvi** (0.14 g, 0.5 mmol), NaOH (0.5 mL, 1.5 mmol, 3 M in water) and I<sub>2</sub> (0.25 g, 1 mmol) gave the title compound as colorless oil. Yield: 0.12 g (85%); <sup>1</sup>H NMR (300 MHz, CDCl<sub>3</sub>) δ 2.21 (d, *J* = 1.2 Hz, 3H), 6.32 (q, *J* = 1.5 Hz, 1H), 7.22 (d, *J* = 8.4 Hz, 2H), 7.37 (d, *J* = 8.4 Hz, 2H); <sup>13</sup>C NMR (75 MHz, CDCl<sub>3</sub>) δ 26.41, 77.43, 128.50(2C), 128.87(2C), 133.40, 141.11, 147.02. C<sub>9</sub>H<sub>8</sub>ICI [M]<sup>+</sup>: 277.9359. Found 277.9368.

**(Z)-1-iodo-2-methyl-1-octen-3-yne (4xvii)**

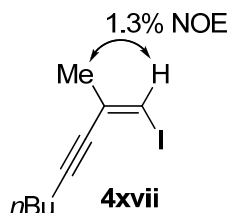

General procedure B starting from **3xvii** (0.12 g, 0.5 mmol), NaOH (0.5 mL, 1.5 mmol, 3 M in water) and I<sub>2</sub> (0.25 g, 1 mmol) gave the title compound as colorless oil. Yield:

0.11 g (87%);  $^1\text{H}$  NMR (300 MHz,  $\text{CDCl}_3$ )  $\delta$  0.94 (t,  $J = 7.5$  Hz, 3H), 1.4-1.65 (m, 4H), 1.97 (d,  $J = 1.2$  Hz, 3H), 2.38 (t,  $J = 7.2$  Hz, 2H), 6.28 (q,  $J = 1.2$  Hz, 1H);  $^{13}\text{C}$  NMR (75 MHz,  $\text{CDCl}_3$ )  $\delta$  13.58, 19.24, 21.91, 24.95, 30.51, 81.93, 82.42, 96.92, 132.41; HRMS calcd for  $\text{C}_9\text{H}_{13}\text{I}$   $[\text{M}]^+$ : 248.0062. Found 248.0068.

**(Z)-(4-(tert-butyldimethylsilyl)-1-iodo-2-methyl-1-buten-3-yne (4xviii)**

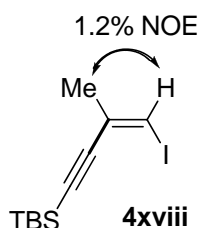

General procedure B starting from **3xviii** (0.545 g, 1.78 mmol), NaOH (0.214 g, 5.34 mmol, in 1.5 mL water) and  $\text{I}_2$  (0.904 g, 3.56 mmol in 6 mL THF) gave the title compound as colorless oil. Yield: 0.457 g (84%);  $^1\text{H}$  NMR (400 MHz,  $\text{CDCl}_3$ )  $\delta$  0.17 (s, 6H), 1.00 (s, 9H), 1.22 (s, 12H), 1.98 (s, 3H), 6.44 (s, 1H);  $^{13}\text{C}$  NMR (100 MHz,  $\text{CDCl}_3$ )  $\delta$  -4.69, 16.61, 24.66, 26.15, 84.76, 99.13, 106.49, 131.98. HRMS calcd for  $\text{C}_{11}\text{H}_{19}\text{SI}$   $[\text{M}]^+$ : 306.2585. Found 306.2599.

**(3Z,6E)-3,7,11-trimethyl-1,3,6,10-dodecatetraene (6)**

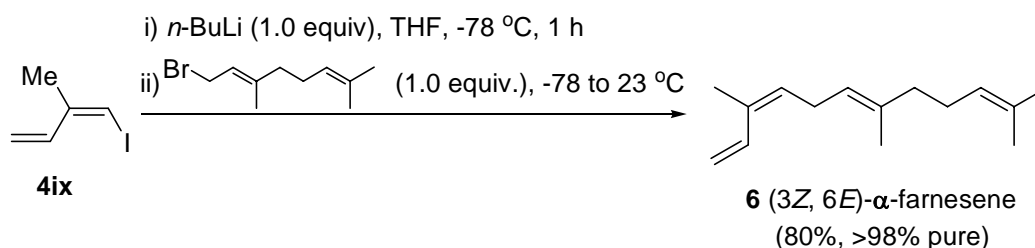

To a stirred solution of (Z)-1-iodo-2-methyl-1,3-butadiene (0.11 g, 0.55 mmol) in THF (2 mL) cooled to  $-78^\circ\text{C}$  was added  $n\text{BuLi}$  (0.24 mL, 0.6 mmol, 2.5 M solution in hexanes). The resultant mixture was stirred 15 min at  $-78^\circ\text{C}$  followed by addition of a solution of geranyl bromide (0.11 g, 0.5 mmol) in dry THF (2 mL). The mixture was stirred 1 h at  $23^\circ\text{C}$ , quenched with water, extracted with ether, washed successively with brine, dried over  $\text{Na}_2\text{SO}_4$ , filtered, and concentrated. Flash chromatography (silica gel, hexanes) afforded the title compound 0.084 g (82%), which is  $\geq 98\%$  pure determined by  $^1\text{H}$  and  $^{13}\text{C}$  NMR analysis.  $^1\text{H}$  NMR (300 MHz,  $\text{CDCl}_3$ )  $\delta$  1.60 (s, 3H), 1.64 (d,  $J = 0.9$  Hz, 3H), 1.68 (d,  $J = 0.9$  Hz, 3H), 1.82 (d,  $J = 1.5$  Hz, 3H), 1.95-2.15 (m, 4H), 2.87 (t,  $J = 6.9$  Hz, 2H), 5.05-5.15 (m, 3H), 5.21 (dd,  $J_1 = 1.2$  Hz,  $J_2 = 17.1$  Hz, 1H), 5.36 (t,  $J = 6.9$  Hz, 3H), 6.81 (ddd,  $J_1 = 0.9$  Hz,  $J_2 = 11.1$  Hz,  $J_3 = 17.7$  Hz, 1H);  $^{13}\text{C}$  NMR (75 MHz,  $\text{CDCl}_3$ )  $\delta$  16.09, 17.67, 19.75, 25.70, 26.34, 26.65, 39.65, 113.46, 122.34, 124.24, 129.73, 131.43, 131.91, 133.65, 135.66.

**(2E,4Z)-4-methyl-2,4-heptadien-6-yn-1-ol (7)**

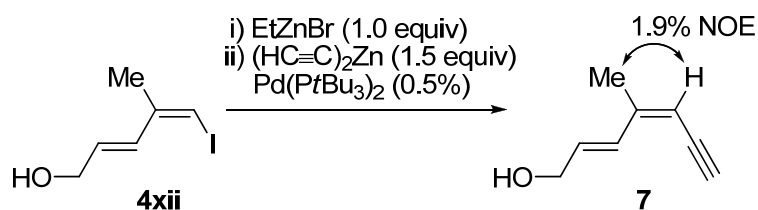

To a solution of (2E,4Z)-5-iodo-4-methyl-2,4-pentadien-1-ol **4xii** (0.21 g, 0.94 mmol) cooled to 0°C was added Et<sub>2</sub>Zn (0.98 mL, 0.98 mmol, 1.0 M solution in hexanes). The mixture was stirred 30 min at 0°C followed by addition of a solution of Pd(*t*-Bu<sub>3</sub>P)<sub>2</sub> (0.5 mL, 0.01 M solutions in THF, 0.005 mmol) in dry THF (1 mL) and diethynylzinc (1.4 mL, 1.4 mmol, 1.0 M solution in hexanes). After 2 h at 23°C reaction mixture was quenched with aqueous NH<sub>4</sub>Cl, extracted with ether, dried over MgSO<sub>4</sub>, filtered, and concentrated. Flash chromatography (silica gel, 2:1 hexane:EtOAc) afforded the title compound 0.11 g (94%), which is ≥ 98% pure determined by <sup>1</sup>H and <sup>13</sup>C NMR analysis. <sup>1</sup>H NMR (300 MHz, CDCl<sub>3</sub>) δ 1.92 (s, 3H), 3.20 (s, 1H), 4.30 (d, *J* = 5.7 Hz, 2H), 5.41 (s, 1H), 6.03 (dt, *J*<sub>1</sub> = 6.0 Hz, *J*<sub>2</sub> = 15.6 Hz, 1H), 6.97 (d, *J* = 15.9 Hz, 1H); <sup>13</sup>C NMR (75 MHz, CDCl<sub>3</sub>) δ 19.16, 63.20, 80.84, 82.49, 107.61, 129.05, 132.21, 146.74.

**(Z)-5-(tert-butyldimethylsilyl)-3-methyl-2-penten-4-ynenitrile (8)**

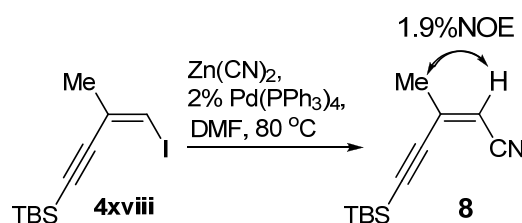

To a solution of **4xviii** (350 mg, 1.14 mmol) and Zn(CN)<sub>2</sub> (174 mg, 1.48 mmol) in dry DMF (2 mL) was added Pd(PPh<sub>3</sub>)<sub>4</sub> (26 mg, 0.023 mmol) at 23°C. The reaction mixture was stirred at 80°C for 3 h. Then, it was diluted with Et<sub>2</sub>O (60 mL), washed with water (2 x 15 mL), dried over MgSO<sub>4</sub>, filtered, and concentrated. Flash chromatography (silica gel, 20:1 hexane:EtOAc) afforded the title compound 225 mg (96%) as colorless oil which is ≥ 98% pure determined by <sup>1</sup>H and <sup>13</sup>C NMR analysis. <sup>1</sup>H NMR (400 MHz, CDCl<sub>3</sub>) δ 0.14 (s, 6H), 0.94 (s, 9H), 2.00 (s, 3H), 5.42 (s, 1H); <sup>13</sup>C NMR (100 MHz, CDCl<sub>3</sub>) δ -5.14, 16.33, 23.39, 25.80, 101.85, 104.09, 105.07, 116.19, 141.84. HRMS calcd for C<sub>12</sub>H<sub>19</sub>NSi [M]<sup>+</sup>: 205.1287. Found 205.1298.

### (Z)-3-methyl-2-penten-4-ynenitrile (9)

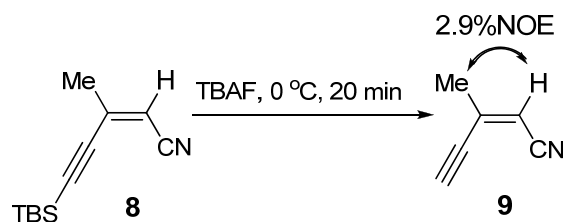

To a cooled (0 °C) solution of **8** (223 mg, 1.09 mmol) in THF (2 mL) was added TBAF (1.14 mL, 1.14 mmol, 1M solution in THF). The resultant mixture was stirred at 0 °C for 20 min, concentrated under vacuum and column chromatography (silica gel, 20:1 Et<sub>2</sub>O:pentane) gave the title compound 84 mg (85%) as colorless oil which is ≥ 98% pure determined by <sup>1</sup>H and <sup>13</sup>C NMR analysis. <sup>1</sup>H NMR (400 MHz, CDCl<sub>3</sub>) δ 2.05 (s, 3H), 3.60 (s, 1H), 5.53 (s, 1H); <sup>13</sup>C NMR (100 MHz, CDCl<sub>3</sub>) δ 23.46, 80.37, 87.83, 105.27, 116.08, 141.39. HRMS calcd for C<sub>6</sub>H<sub>5</sub>N [M]<sup>+</sup>: 91.0422. Found 91.0401.

### Reference

- [i] R. L. Shriner, F. W. Neumann, *Org. Synth.* **1955**, Coll. Vol. III, p73.
- [ii] Z. M. Ismail, H. M. R. Hoffmann, *J. Org. Chem.* **1981**, *46*, 3549–3550.
- [iii] A. Yajima, A. A. N. van Brussel, J. Schripsema, T. Nukada, G. Yabuta, *Org. Lett.* **2008**, *10*, 2047–2050.
- [iv] E. Negishi, V. Bagheri, S. Chatterjee, L. Fen-Tair, J. A. Miller, A. T. Stolly, *Tetrahedron Lett.* **1983**, *24*, 5181–5184.
- [v] Z. Huang, E. Negishi, *Org. Lett.* **2006**, *8*, 3675–3678.
- [vi] E. Negishi, H. Matsushita, N. Okukado, *Tetrahedron Lett.* **1981**, *22*, 2715–2718.
- [vii] Negishi E.-I.; Swanson D. R.; Rousset Ch. J. *J. Org. Chem.* **1990**, *55*, 19, 5046-5409.
- [viii] C. Morrill, R. H. Grubbs, *J. Org. Chem.* **2003**, *68*, 6031–6034.

Highly Regio- and Stereoselective Synthesis of Z-Trisubstituted Alkenes via Propyne Bromoboration and Tandem Pd-Catalyzed Cross-Coupling

Chao Wang, Tomas Tobrman, Zhaoqing Xu, and Ei-ichi Negishi\*

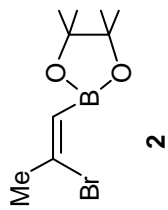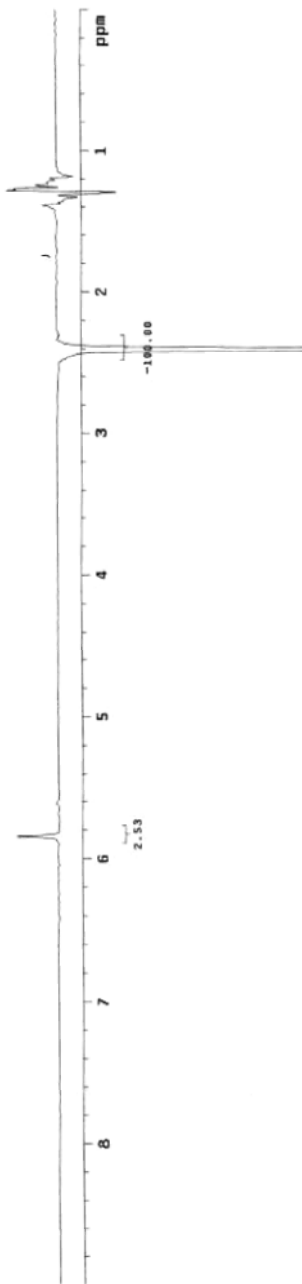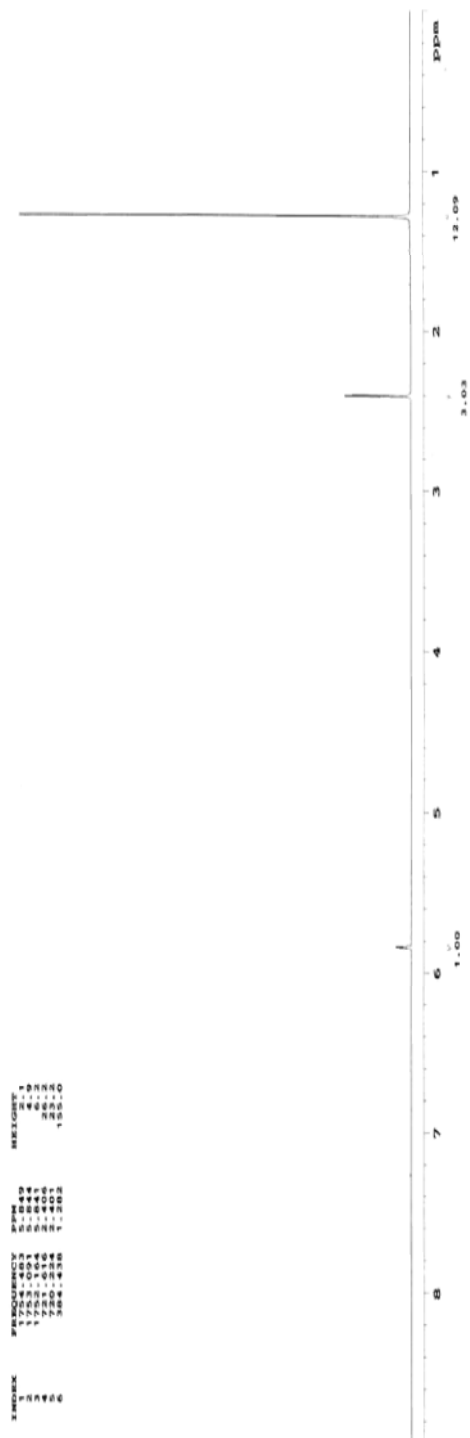



Highly Regio- and Stereoselective Synthesis of Z-Trisubstituted Alkenes via Propyne Bromoboration and Tandem Pd-Catalyzed Cross-Coupling

Chao Wang, Tomas Tobrman, Zhaoqing Xu, and Ei-ichi Negishi\*

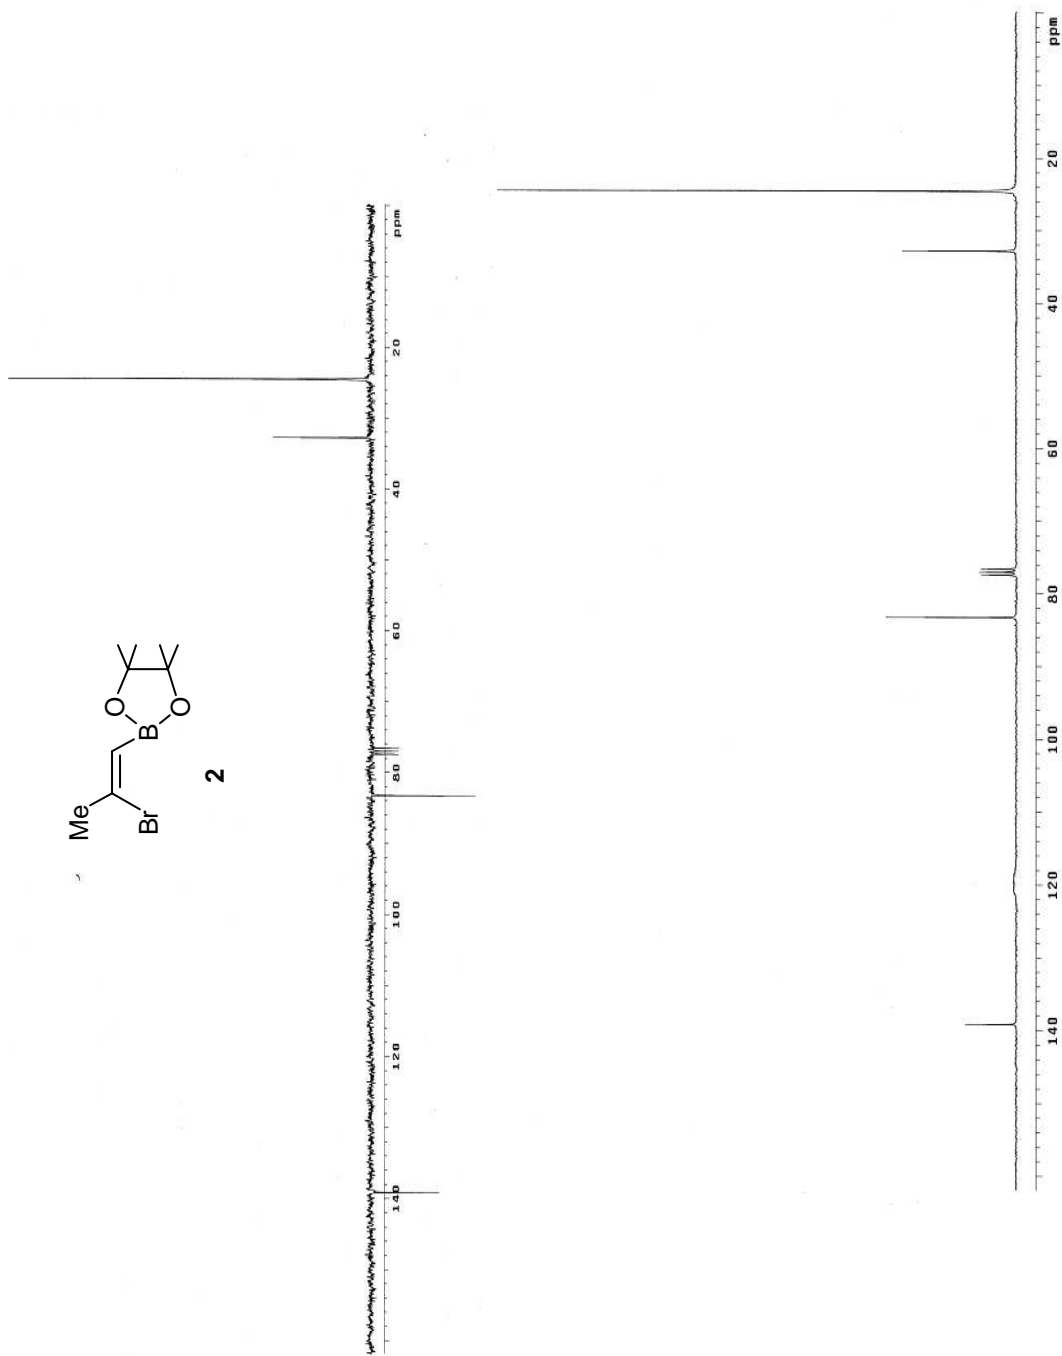

Highly Regio- and Stereoselective Synthesis of Z-Trisubstituted Alkenes via Propyne Bromoboration and Tandem Pd-Catalyzed Cross-Coupling

Chao Wang, Tomas Tobrman, Zhaoqing Xu, and Ei-ichi Negishi\*

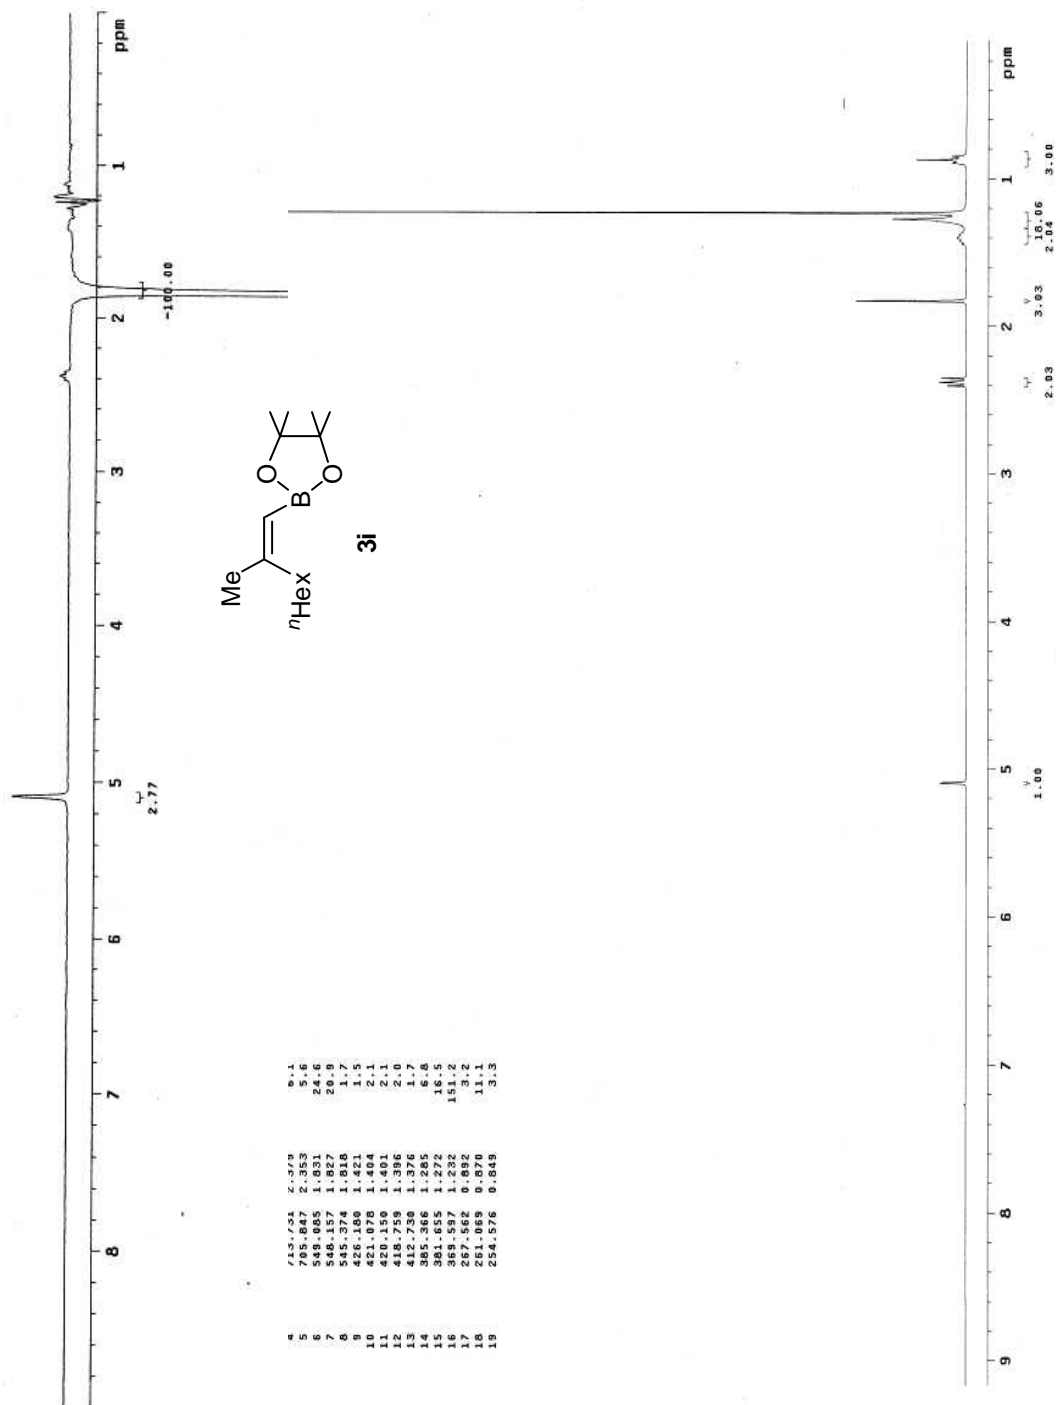

Chao Wang, Tomas Tobrman, Zhaoqing Xu, and Ei-ichi Negishi\*

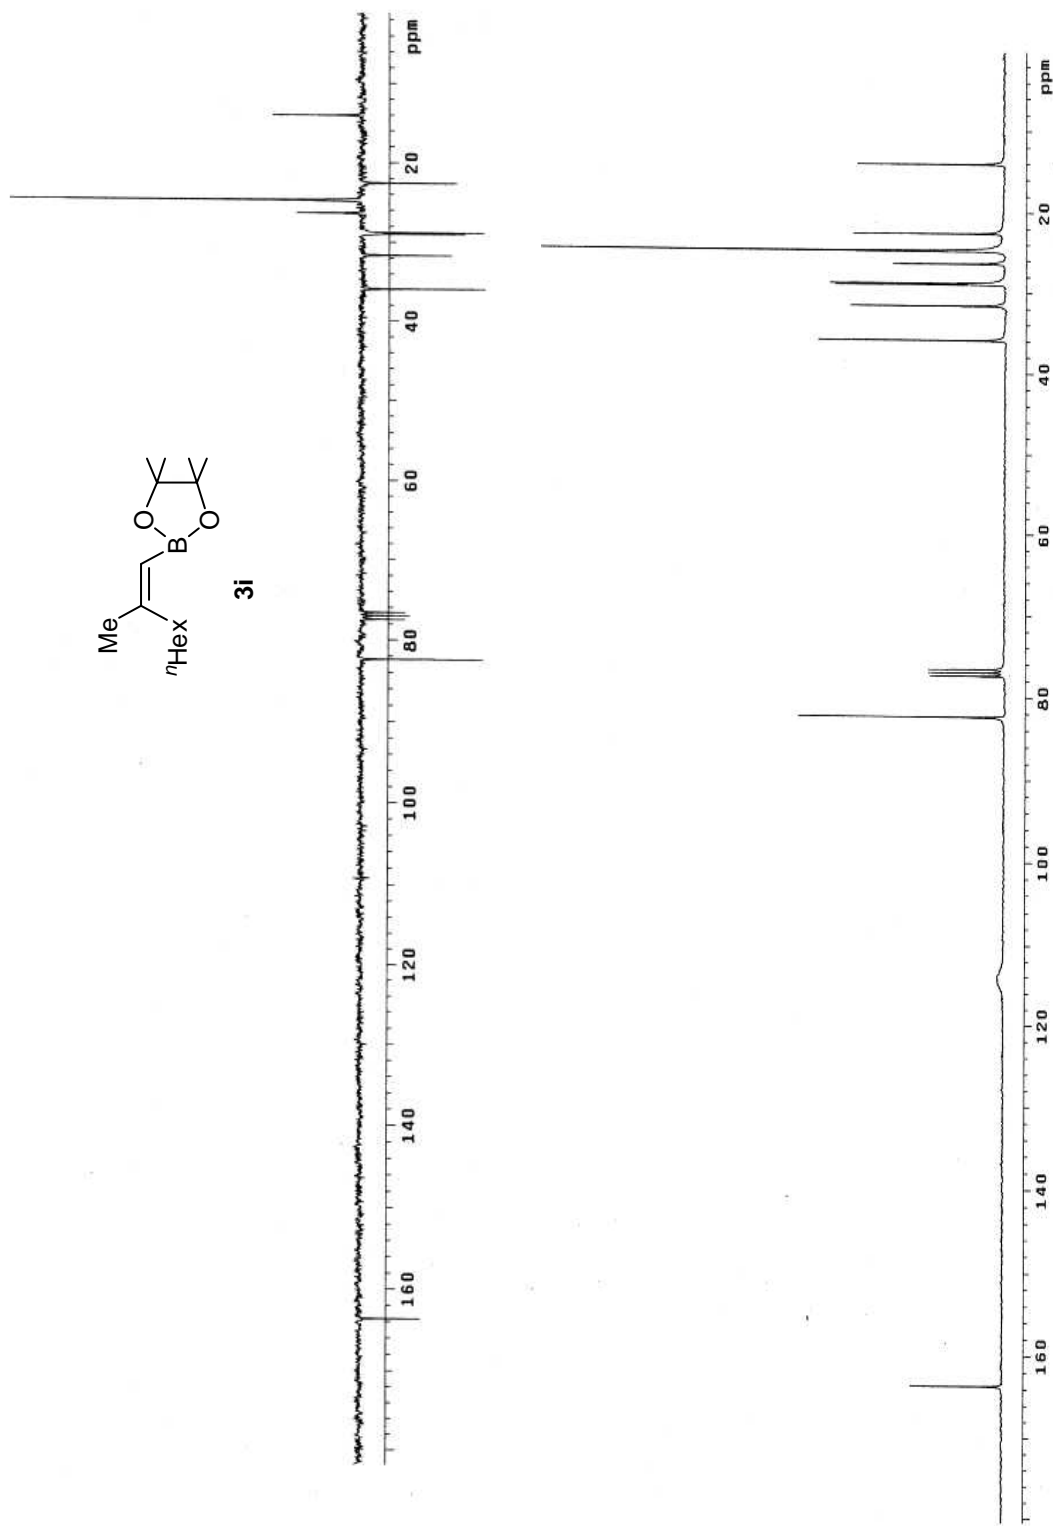

Highly Regio- and Stereoselective Synthesis of Z-Trisubstituted Alkenes via Propyne Bromoboration and Tandem Pd-Catalyzed Cross-Coupling

Chao Wang, Tomas Tobrman, Zhaoqing Xu, and Ei-ichi Negishi\*

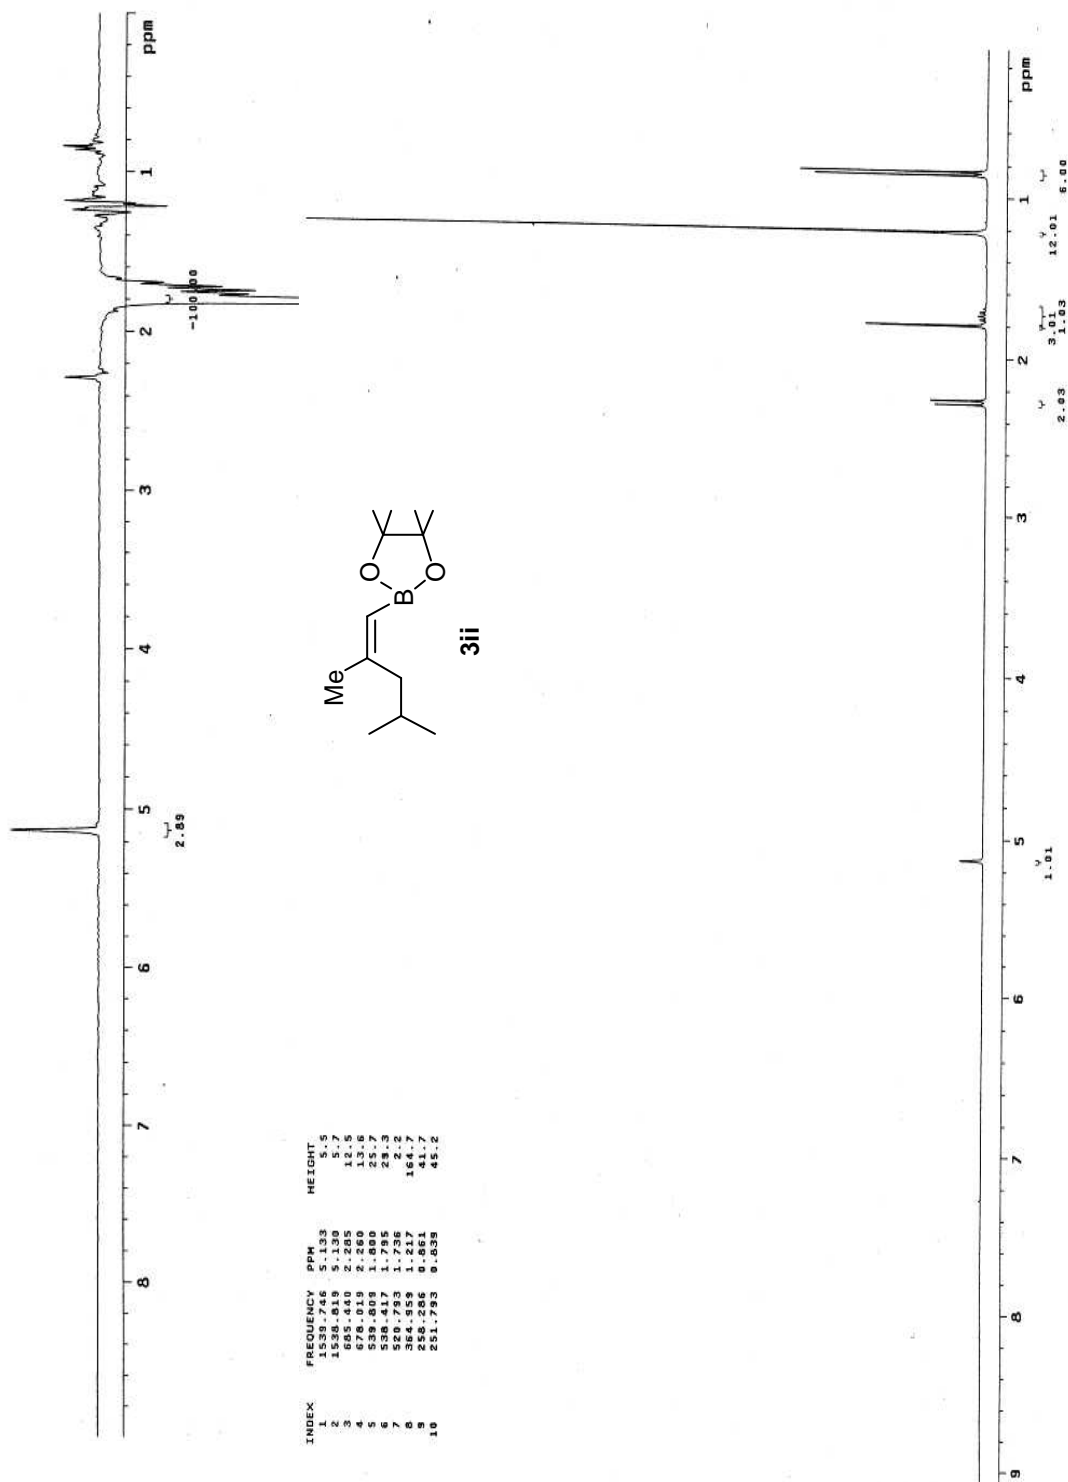

# Highly Regio- and Stereoselective Synthesis of Z-Trisubstituted Alkenes via Propyne Bromoboration and Tandem Pd-Catalyzed Cross-Coupling

Chao Wang, Tomas Tobrman, Zhaoqing Xu, and Ei-ichi Negishi\*

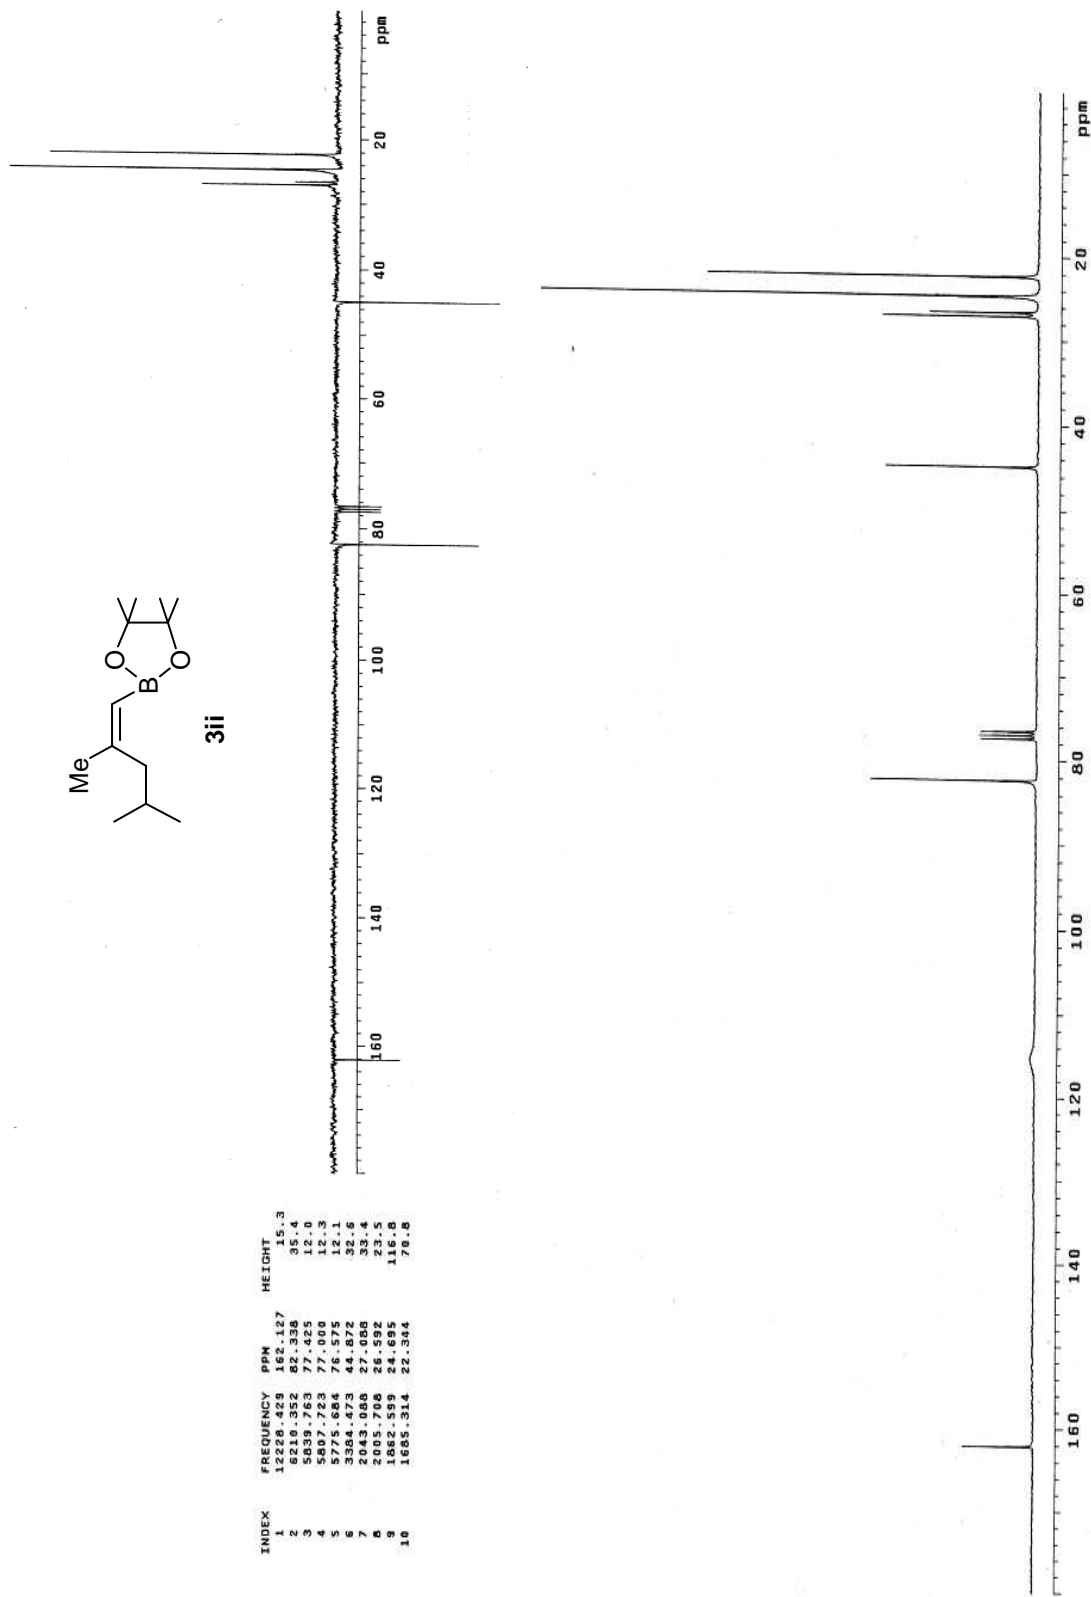



Highly Regio- and Stereoselective Synthesis of Z-Trisubstituted Alkenes via Propyne Bromoboration and Tandem Pd-Catalyzed Cross-Coupling

Chao Wang, Tomas Tobrman, Zhaoqing Xu, and Ei-ichi Negishi\*

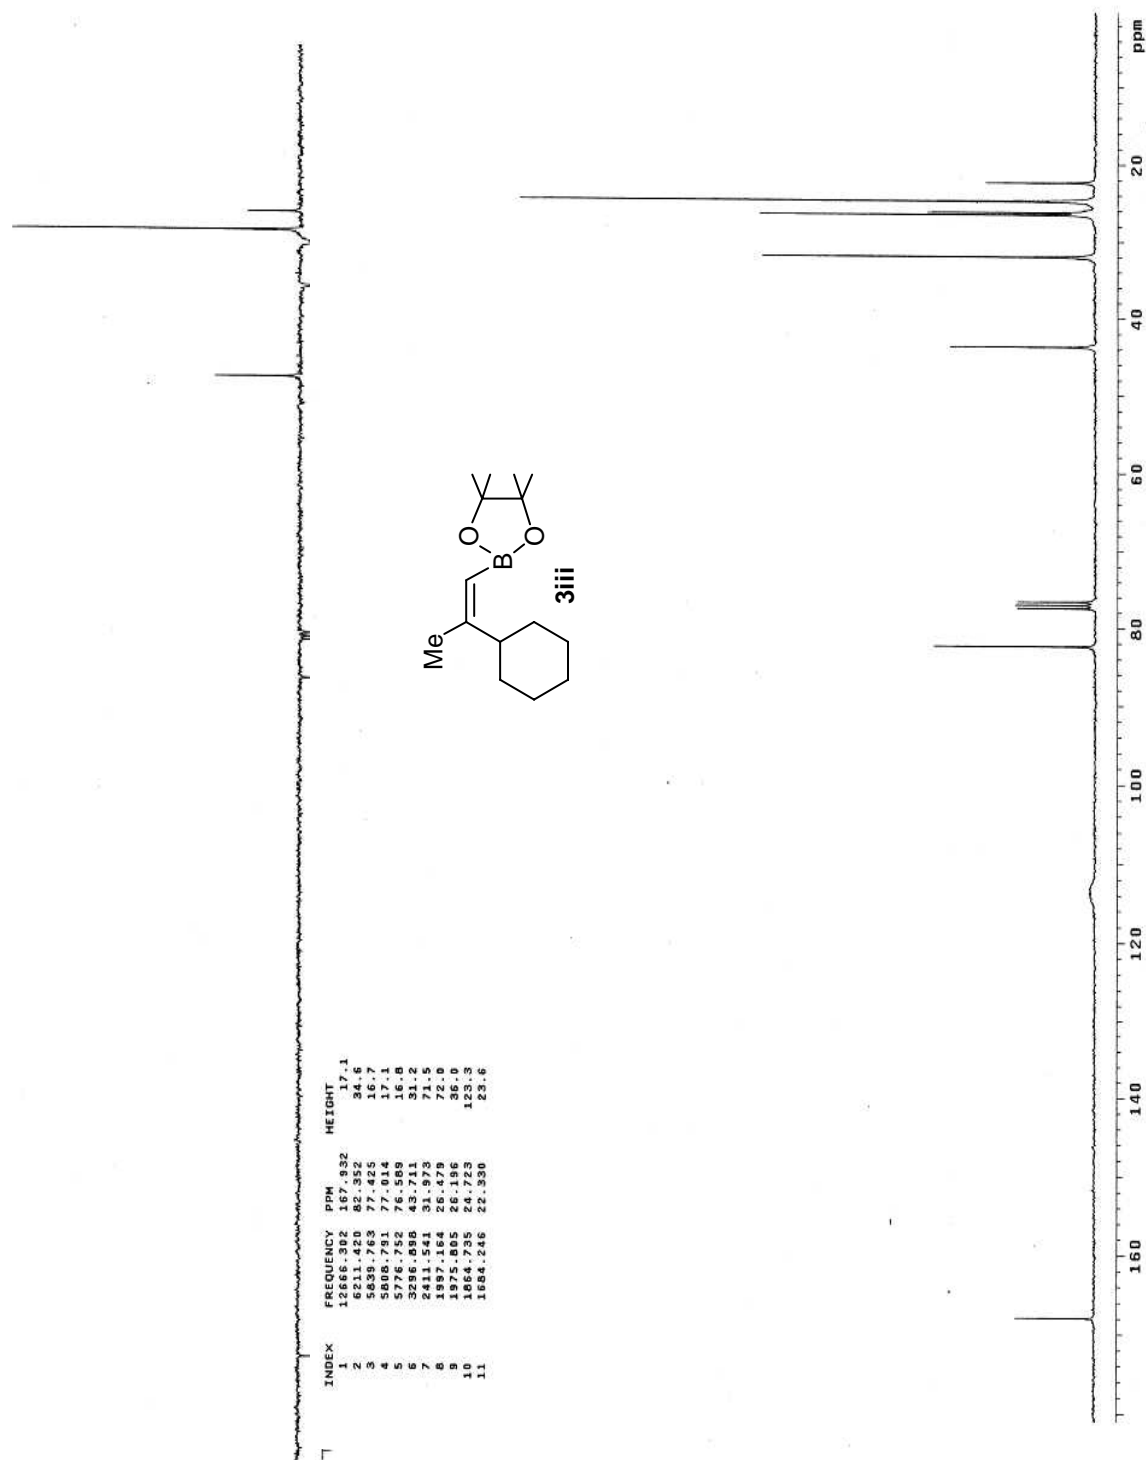





Chao Wang, Tomas Tobrman, Zhaoping Xu, and Ei-ichi Negishi\*

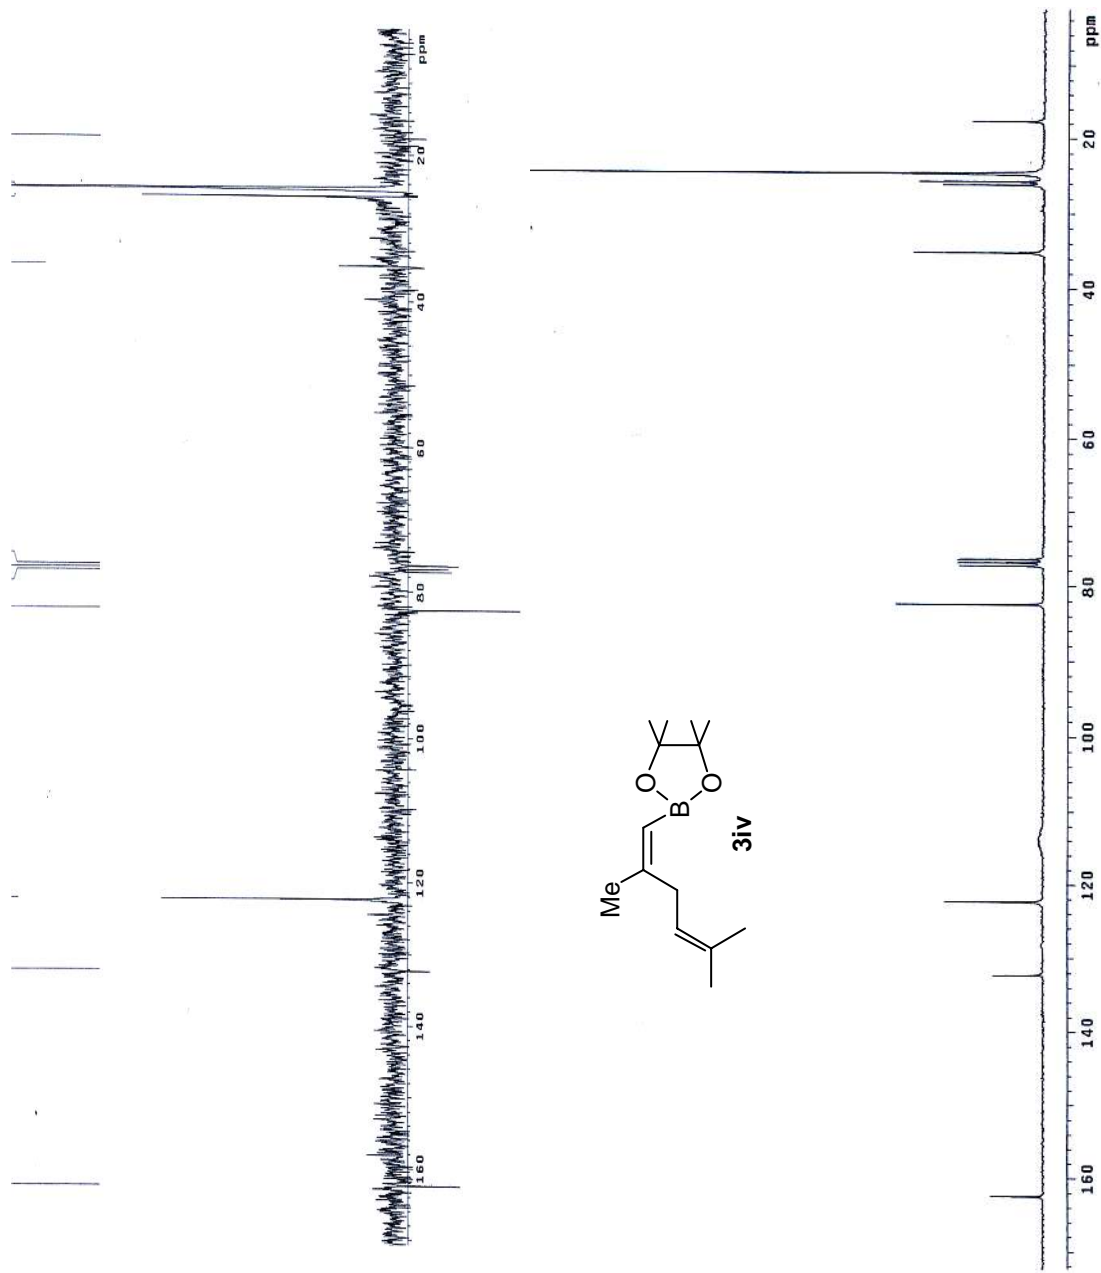



Highly Regio- and Stereoselective Synthesis of Z-Trisubstituted Alkenes via Propyne Bromoboration and Tandem Pd-Catalyzed Cross-Coupling

Chao Wang, Tomas Tobrman, Zhaoqing Xu, and Ei-ichi Negishi\*

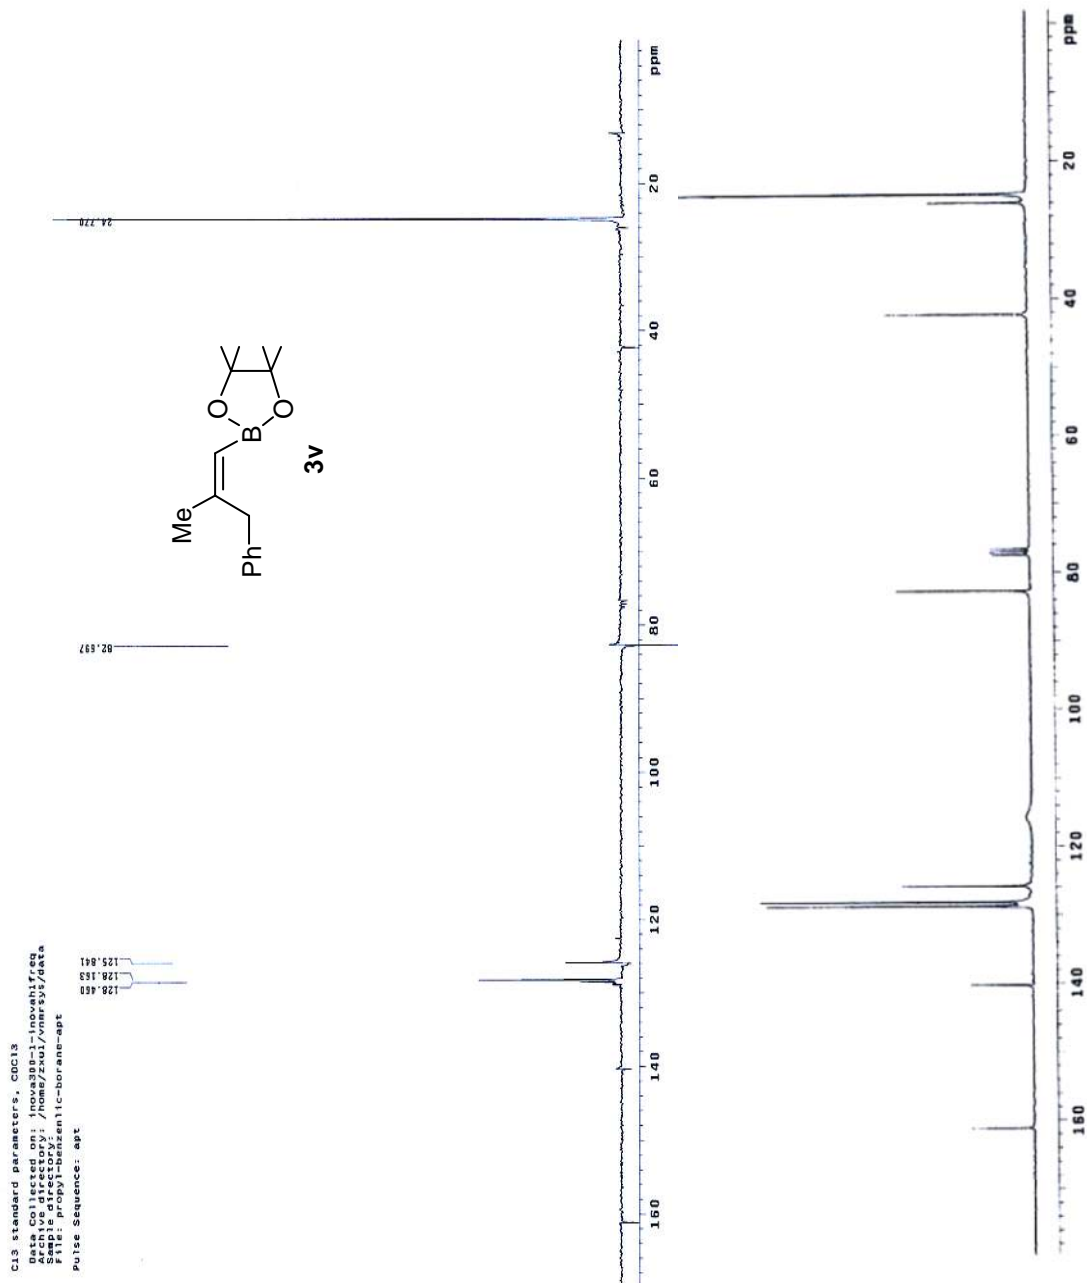

Highly Regio- and Stereoselective Synthesis of Z-Trisubstituted Alkenes via Propyne Bromoboration and Tandem Pd-Catalyzed Cross-Coupling

Chao Wang, Tomas Tobrman, Zhaoqing Xu, and Ei-ichi Negishi\*

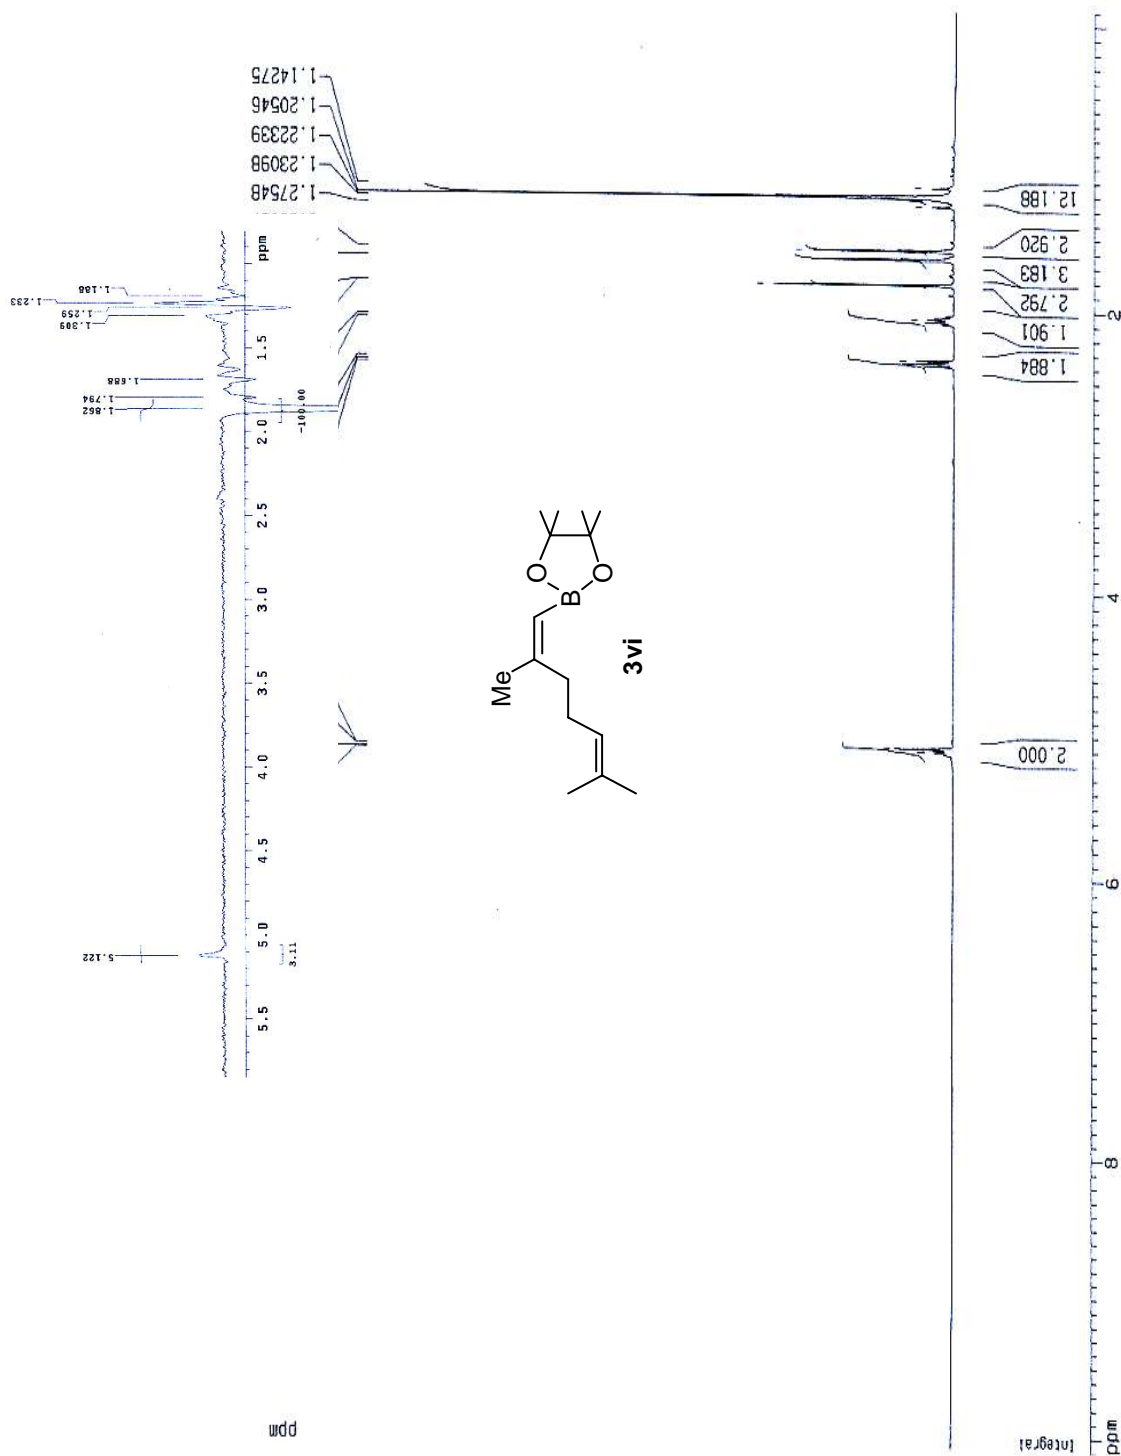

Highly Regio- and Stereoselective Synthesis of Z-Trisubstituted Alkenes via Propyne Bromoboration and Tandem Pd-Catalyzed Cross-Coupling

Chao Wang, Tomas Tobrman, Zhaoqing Xu, and Ei-ichi Negishi\*

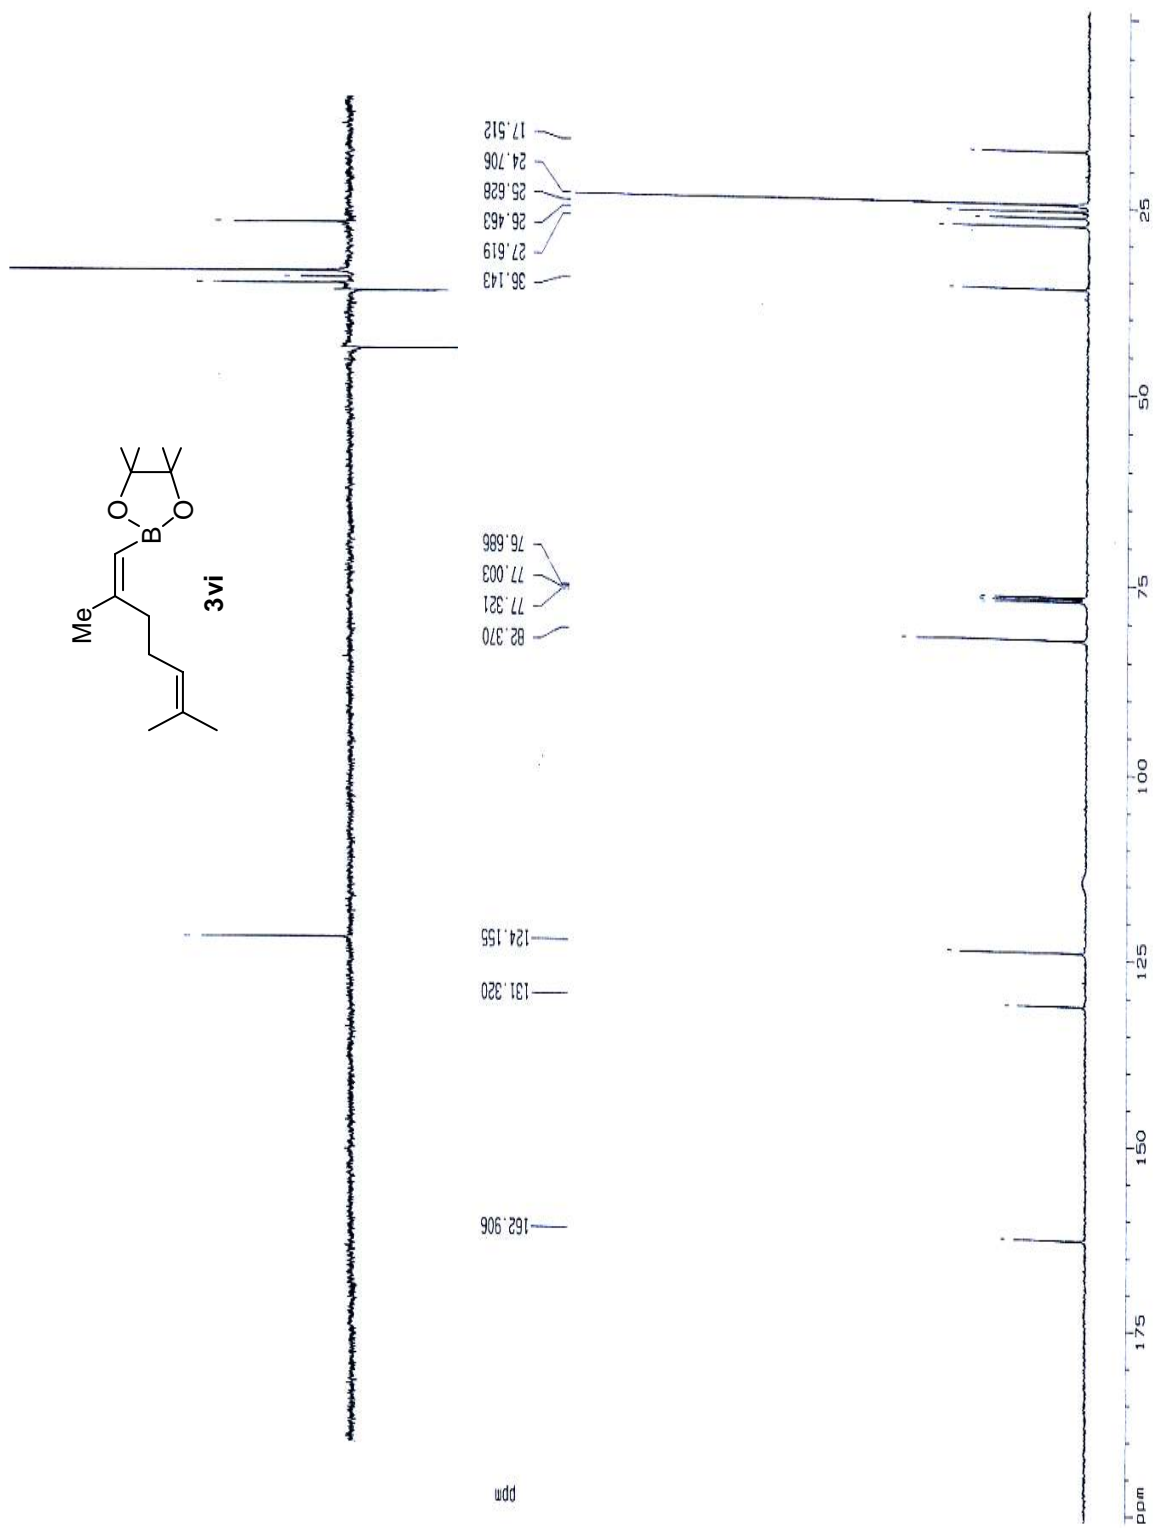

Highly Regio- and Stereoselective Synthesis of Z-Trisubstituted Alkenes via Propyne Bromoboration and Tandem Pd-Catalyzed Cross-Coupling

Chao Wang, Tomas Tobrman, Zhaoqing Xu, and Ei-ichi Negishi\*

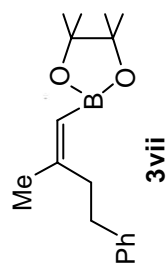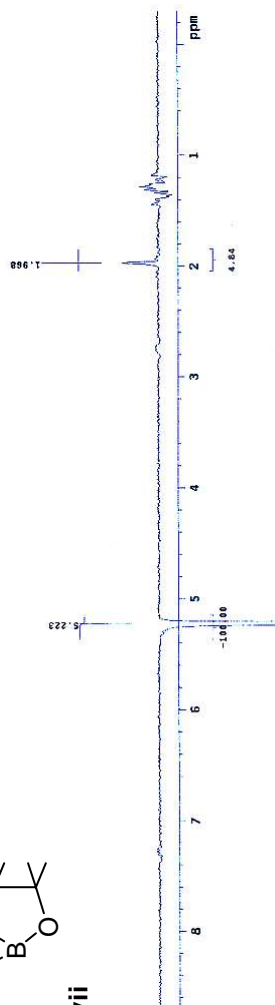

S34

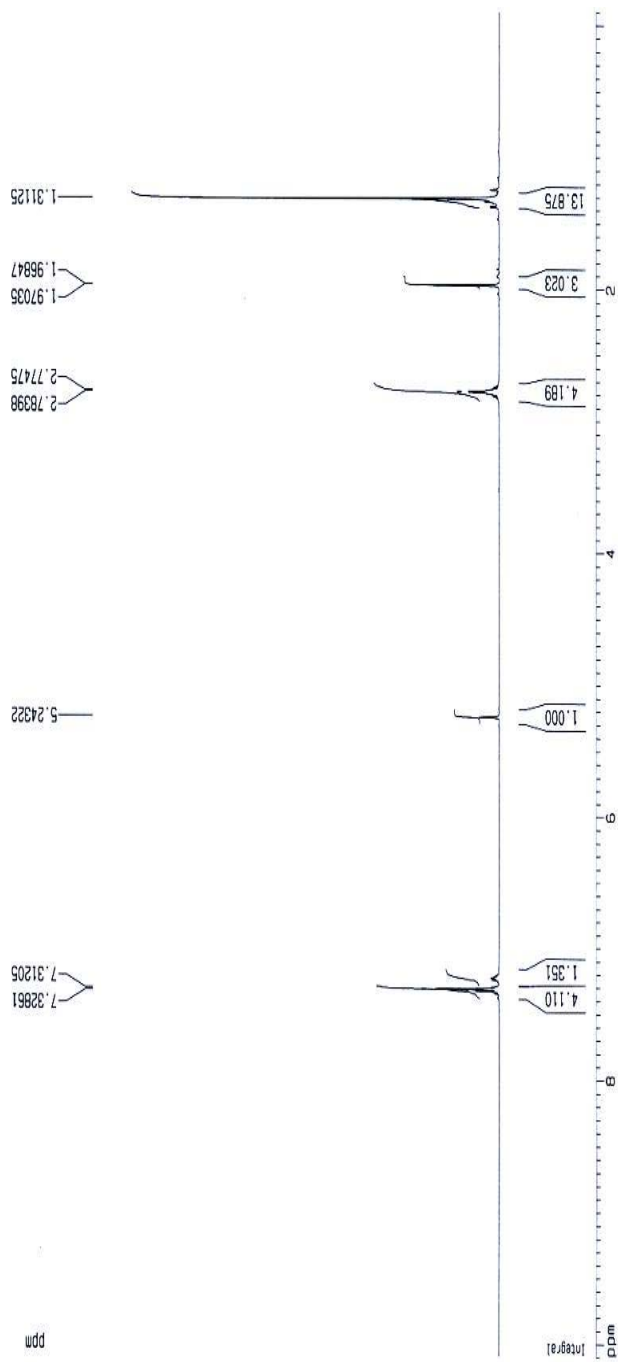

Chao Wang, Tomas Tobrman, Zhaoqing Xu, and Ei-ichi Negishi\*

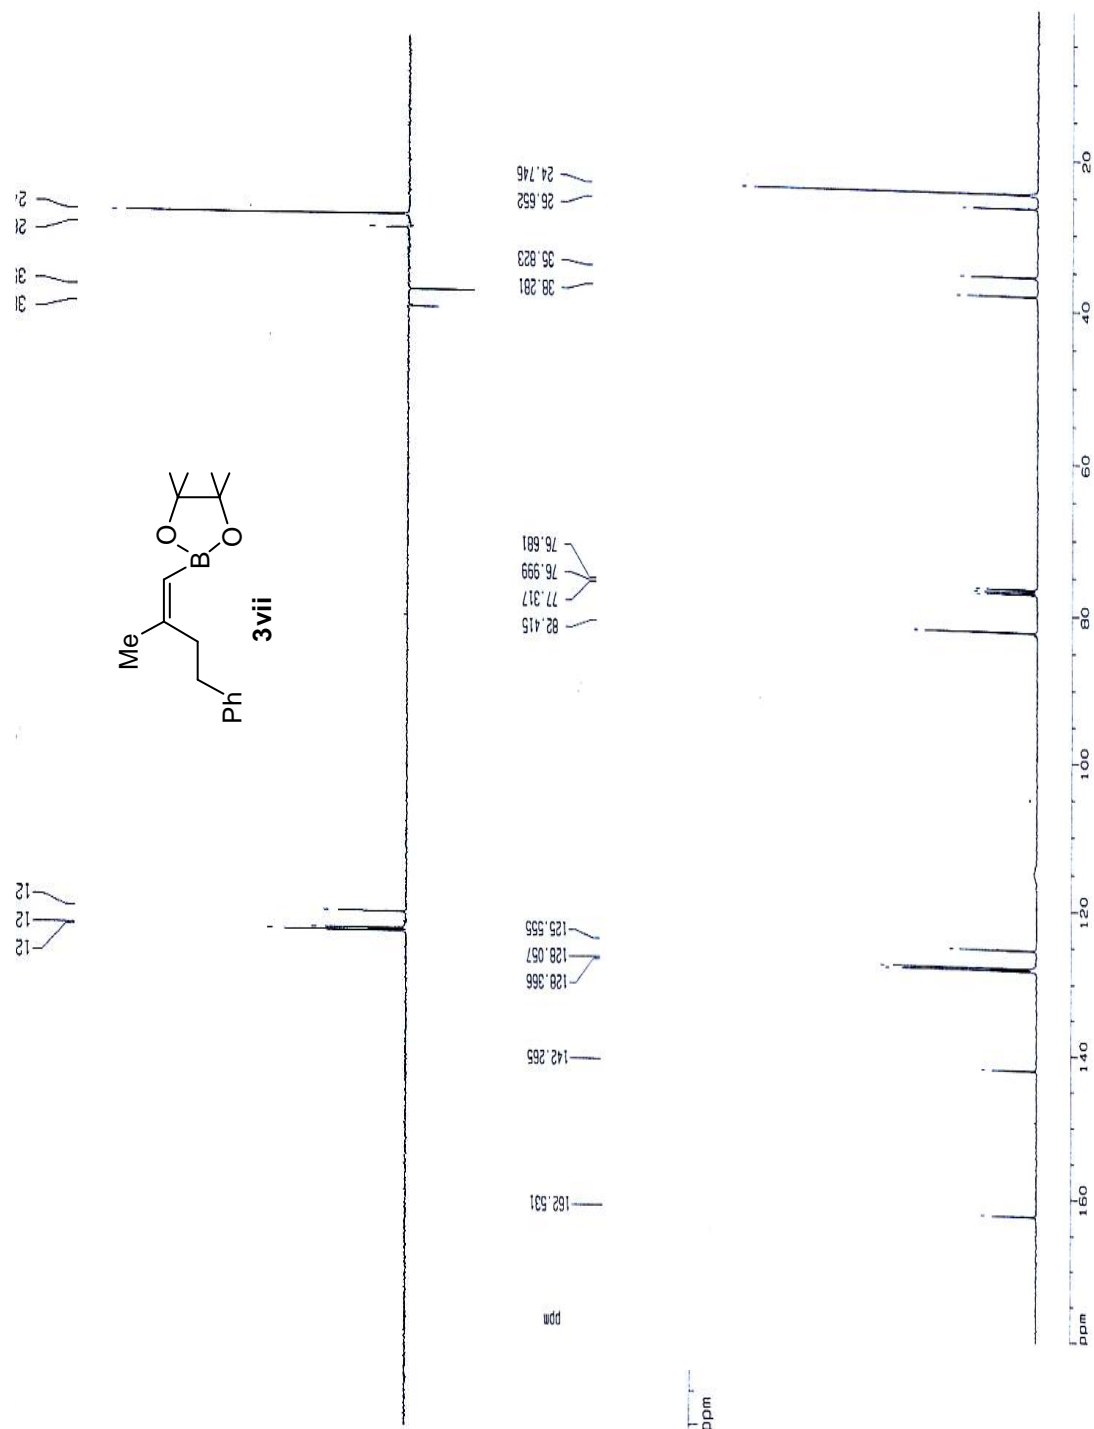

Highly Regio- and Stereoselective Synthesis of Z-Trisubstituted Alkenes via Propyne Bromoboration and Tandem Pd-Catalyzed Cross-Coupling

Chao Wang, Tomas Tobrman, Zhaoqing Xu, and Ei-ichi Negishi\*

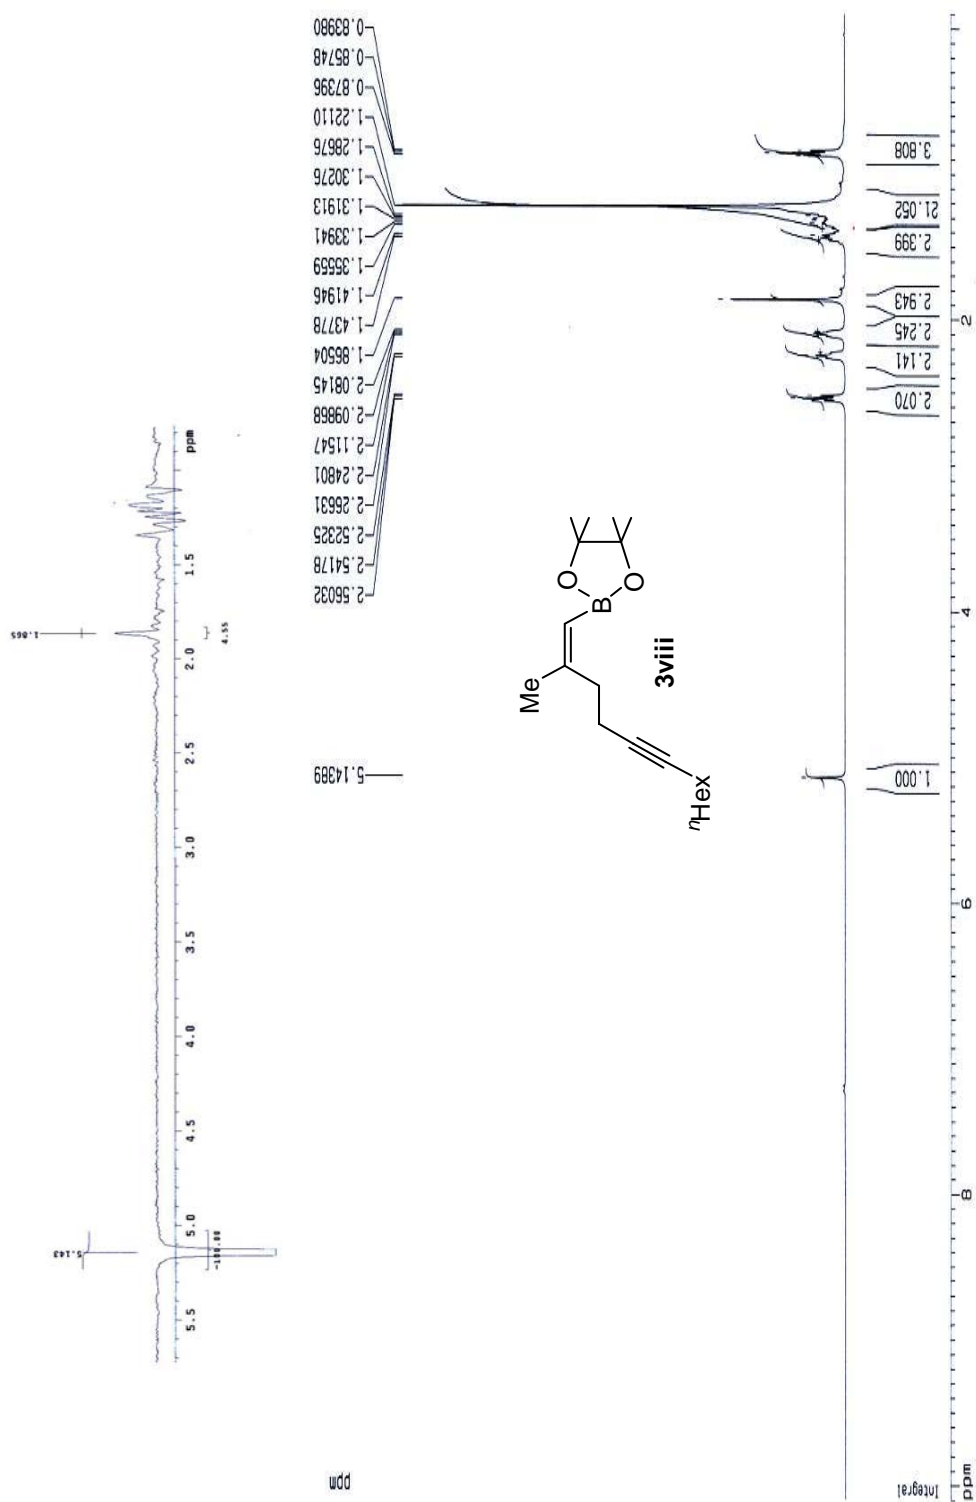



Highly Regio- and Stereoselective Synthesis of Z-Trisubstituted Alkenes via Propyne Bromoboration and Tandem Pd-Catalyzed Cross-Coupling

Chao Wang, Tomas Tobrman, Zhaoqing Xu, and Ei-ichi Negishi\*

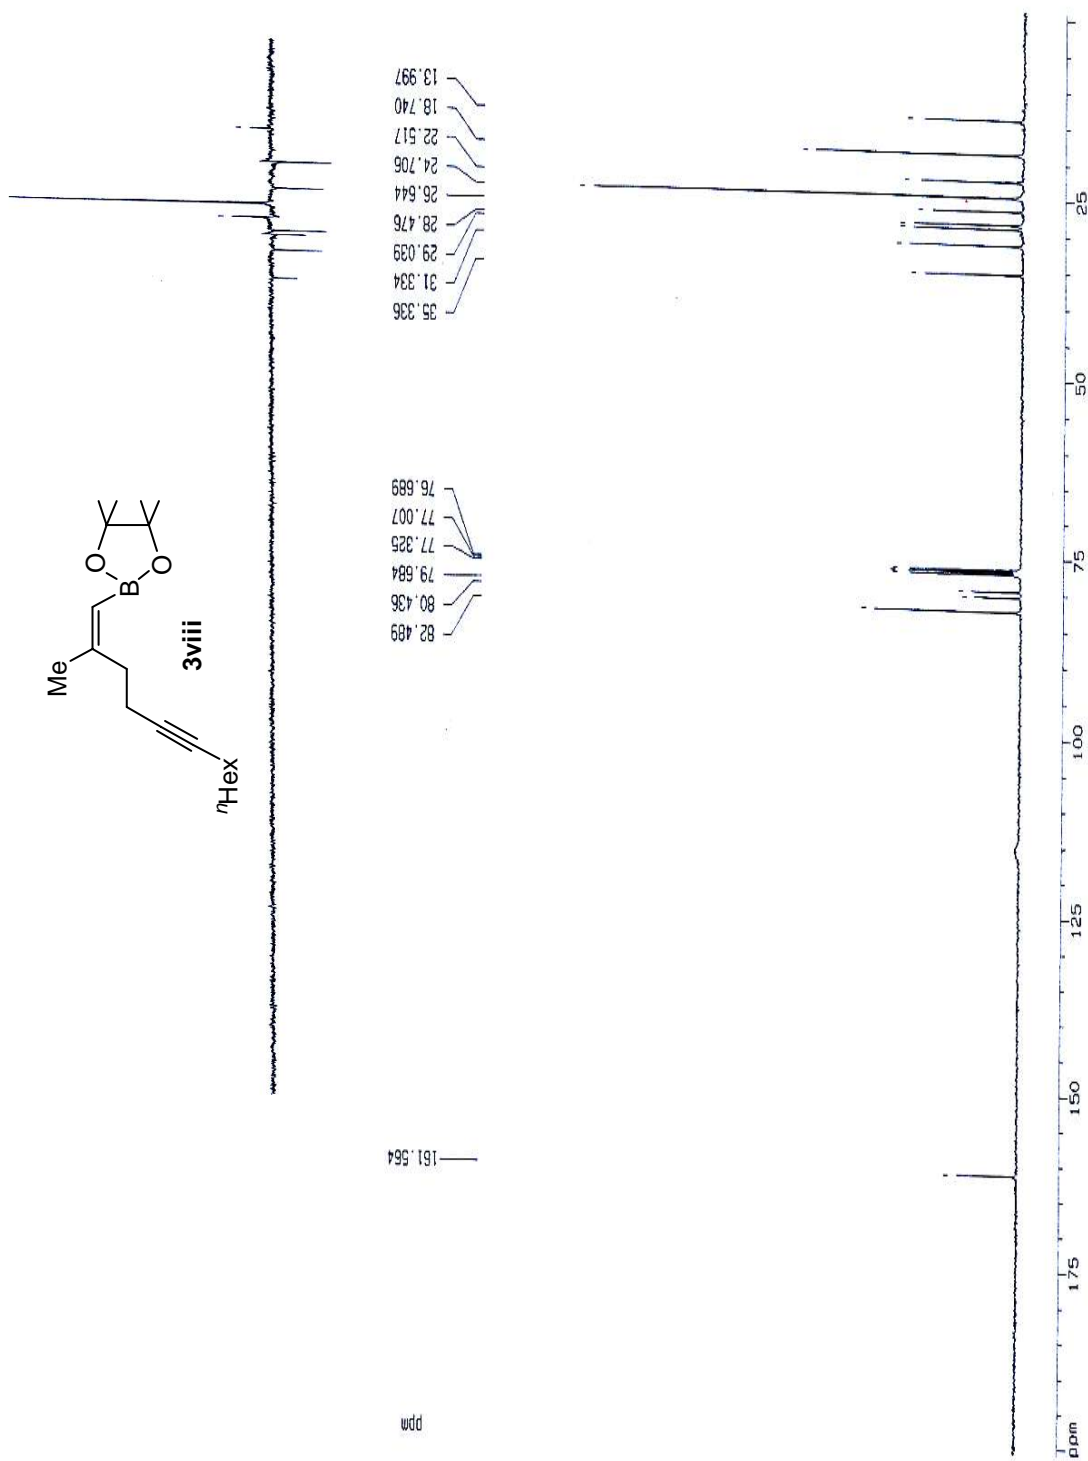

Highly Regio- and Stereoselective Synthesis of Z-Trisubstituted Alkenes via Propyne Bromoboration and Tandem Pd-Catalyzed Cross-Coupling

Chao Wang, Tomas Tobrman, Zhaoqing Xu, and Ei-ichi Negishi\*

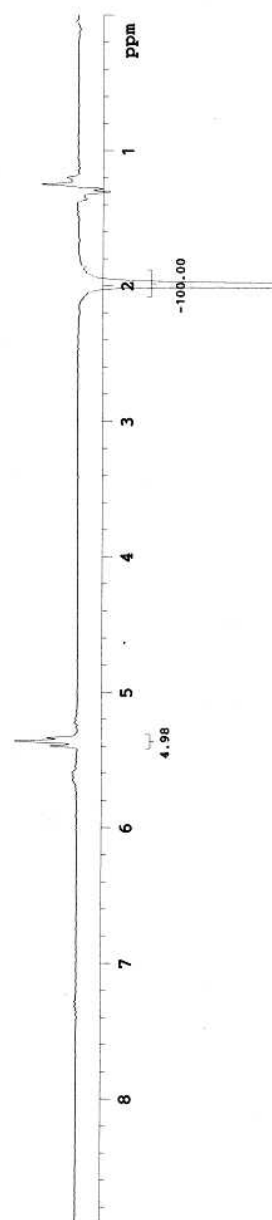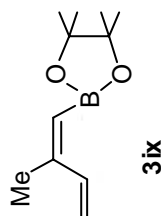

| INDEX | FREQUENCY | PPM   | HEIGHT |
|-------|-----------|-------|--------|
| 1     | 2200.631  | 7.336 | 2.5    |
| 2     | 2184.159  | 7.375 | 2.7    |
| 3     | 1619.519  | 5.399 | 3.9    |
| 4     | 1608.822  | 5.384 | 4.8    |
| 5     | 1601.895  | 5.340 | 3.5    |
| 6     | 1577.776  | 5.260 | 2.5    |
| 7     | 1574.995  | 5.251 | 4.0    |
| 8     | 1567.710  | 5.224 | 4.5    |
| 9     | 1564.528  | 5.215 | 2.0    |
| 10    | 1555.895  | 5.195 | 2.5    |
| 11    | 595.464   | 1.985 | 22.3   |
| 12    | 383.511   | 1.279 | 161.0  |

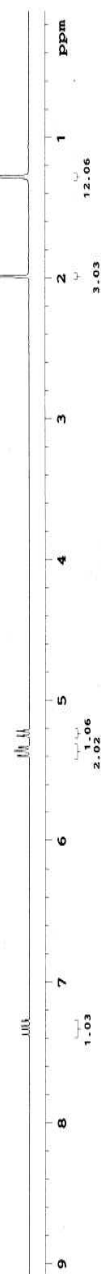

Highly Regio- and Stereoselective Synthesis of Z-Trisubstituted Alkenes via Propyne Bromoboration and Tandem Pd-Catalyzed Cross-Coupling

Chao Wang, Tomas Tobrman, Zhaoqing Xu, and Ei-ichi Negishi\*

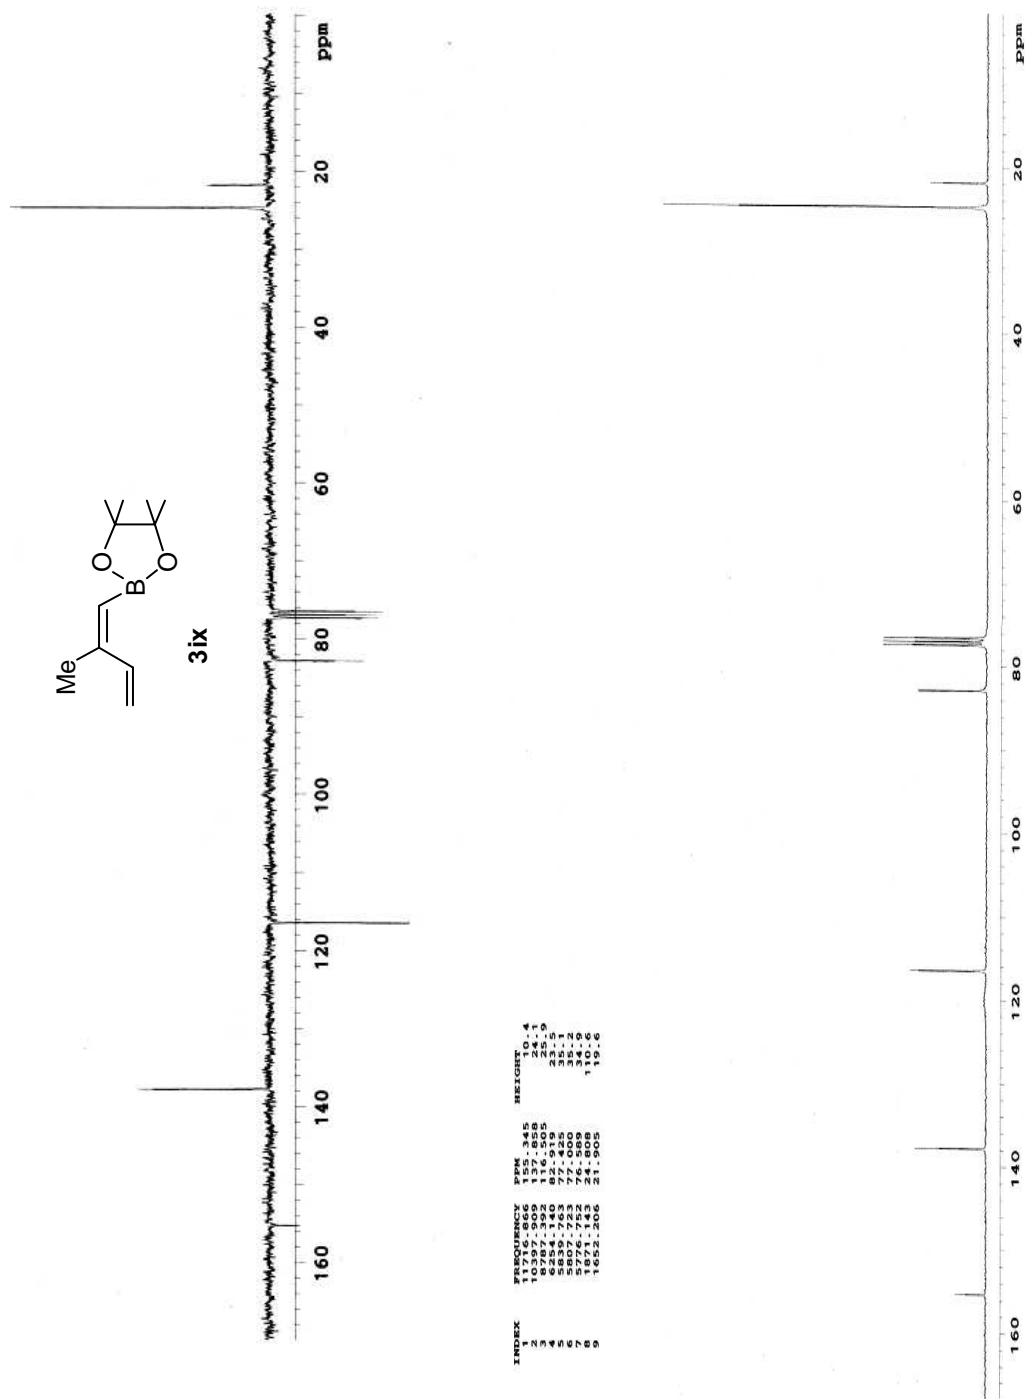

Highly Regio- and Stereoselective Synthesis of Z-Trisubstituted Alkenes via Propyne Bromoboration and Tandem Pd-Catalyzed Cross-Coupling

Chao Wang, Tomas Tobrman, Zhaoqing Xu, and Ei-ichi Negishi\*

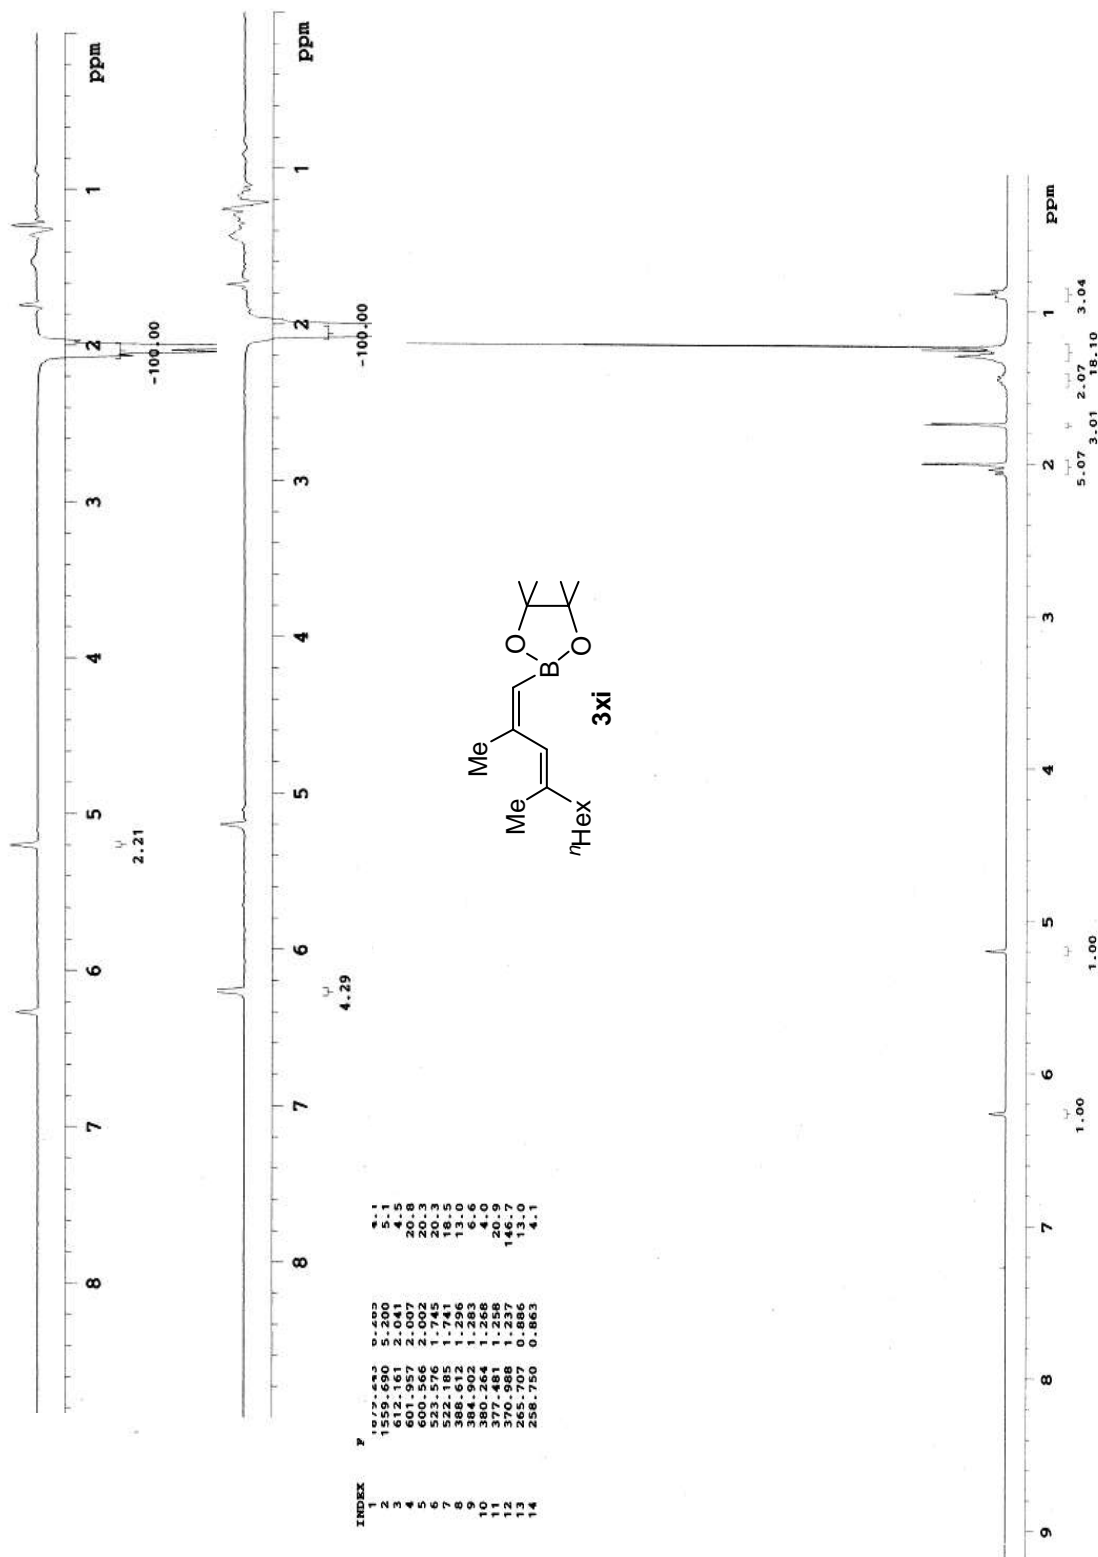

# Highly Regio- and Stereoselective Synthesis of Z-Trisubstituted Alkenes via Propyne Bromoboration and Tandem Pd-Catalyzed Cross-Coupling

Chao Wang, Tomas Tobrman, Zhaoqing Xu, and Ei-ichi Negishi\*

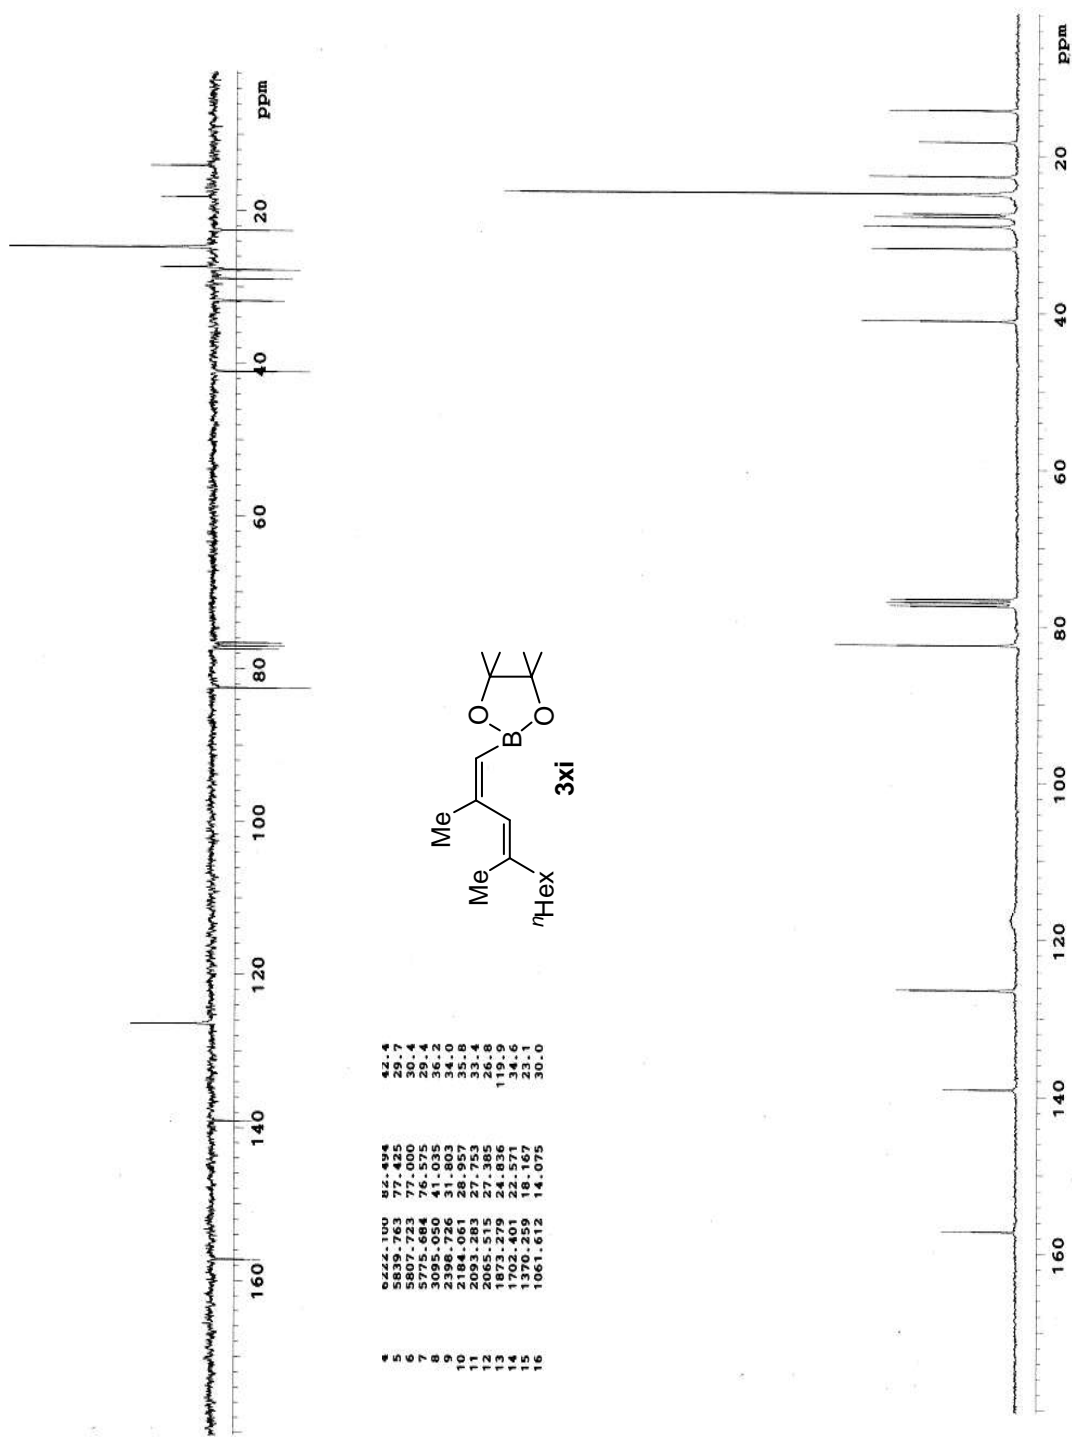

Highly Regio- and Stereoselective Synthesis of Z-Trisubstituted Alkenes via Propyne Bromoboration and Tandem Pd-Catalyzed Cross-Coupling

Chao Wang, Tomas Tobrman, Zhaoqing Xu, and Ei-ichi Negishi\*

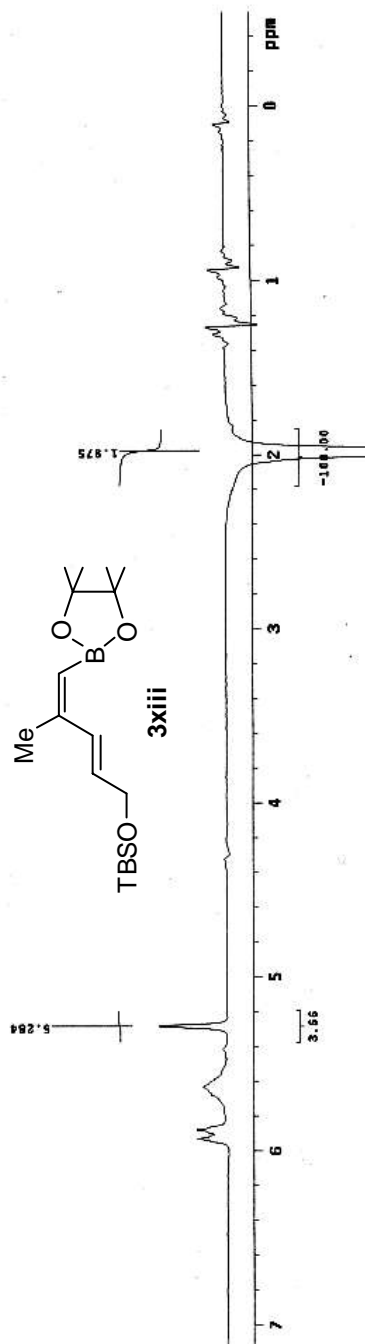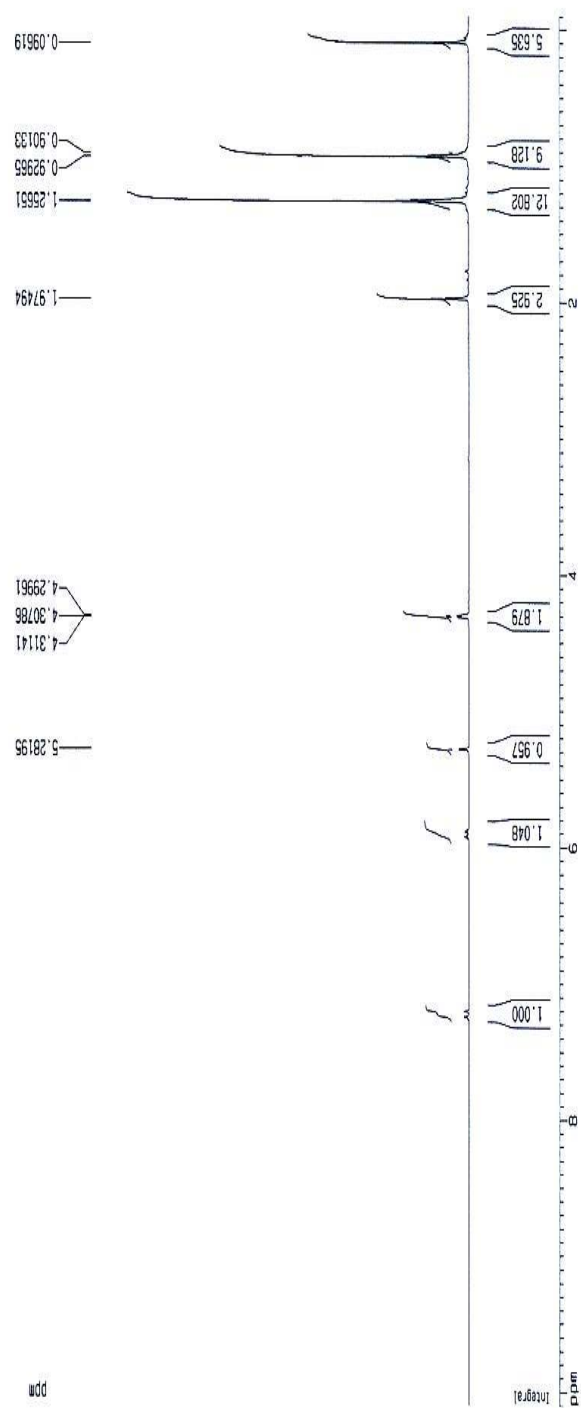

Chao Wang, Tomas Tobrman, Zhaoqing Xu, and Ei-ichi Negishi\*

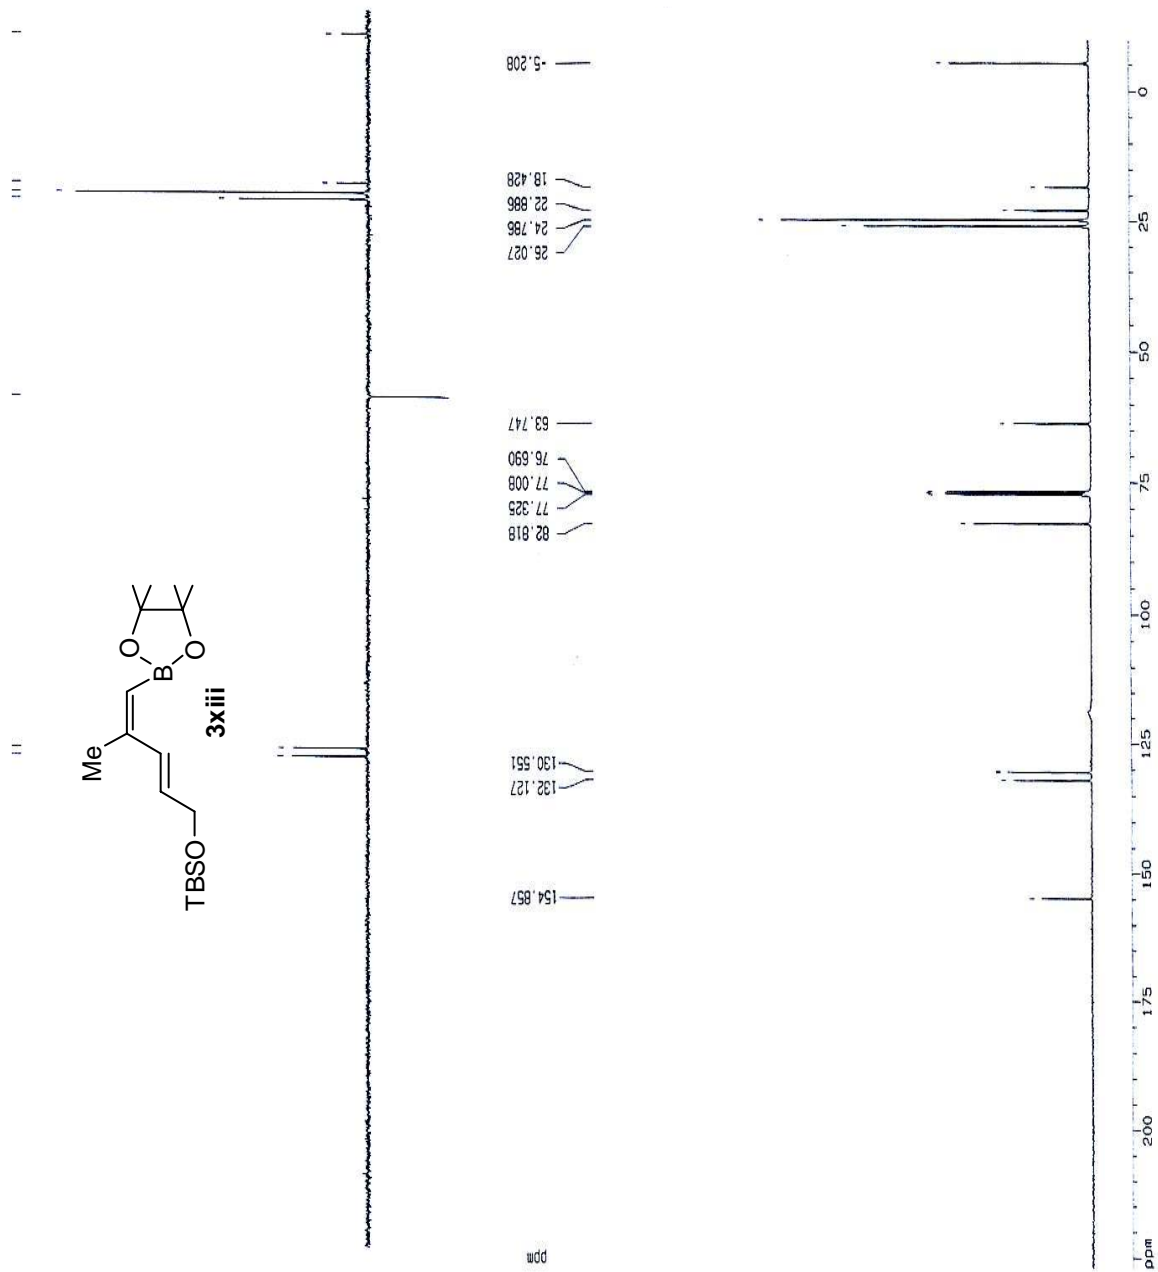

Highly Regio- and Stereoselective Synthesis of Z-Trisubstituted Alkenes via Propyne Bromoboration and Tandem Pd-Catalyzed Cross-Coupling

Chao Wang, Tomas Tobrman, Zhaoqing Xu, and Ei-ichi Negishi\*

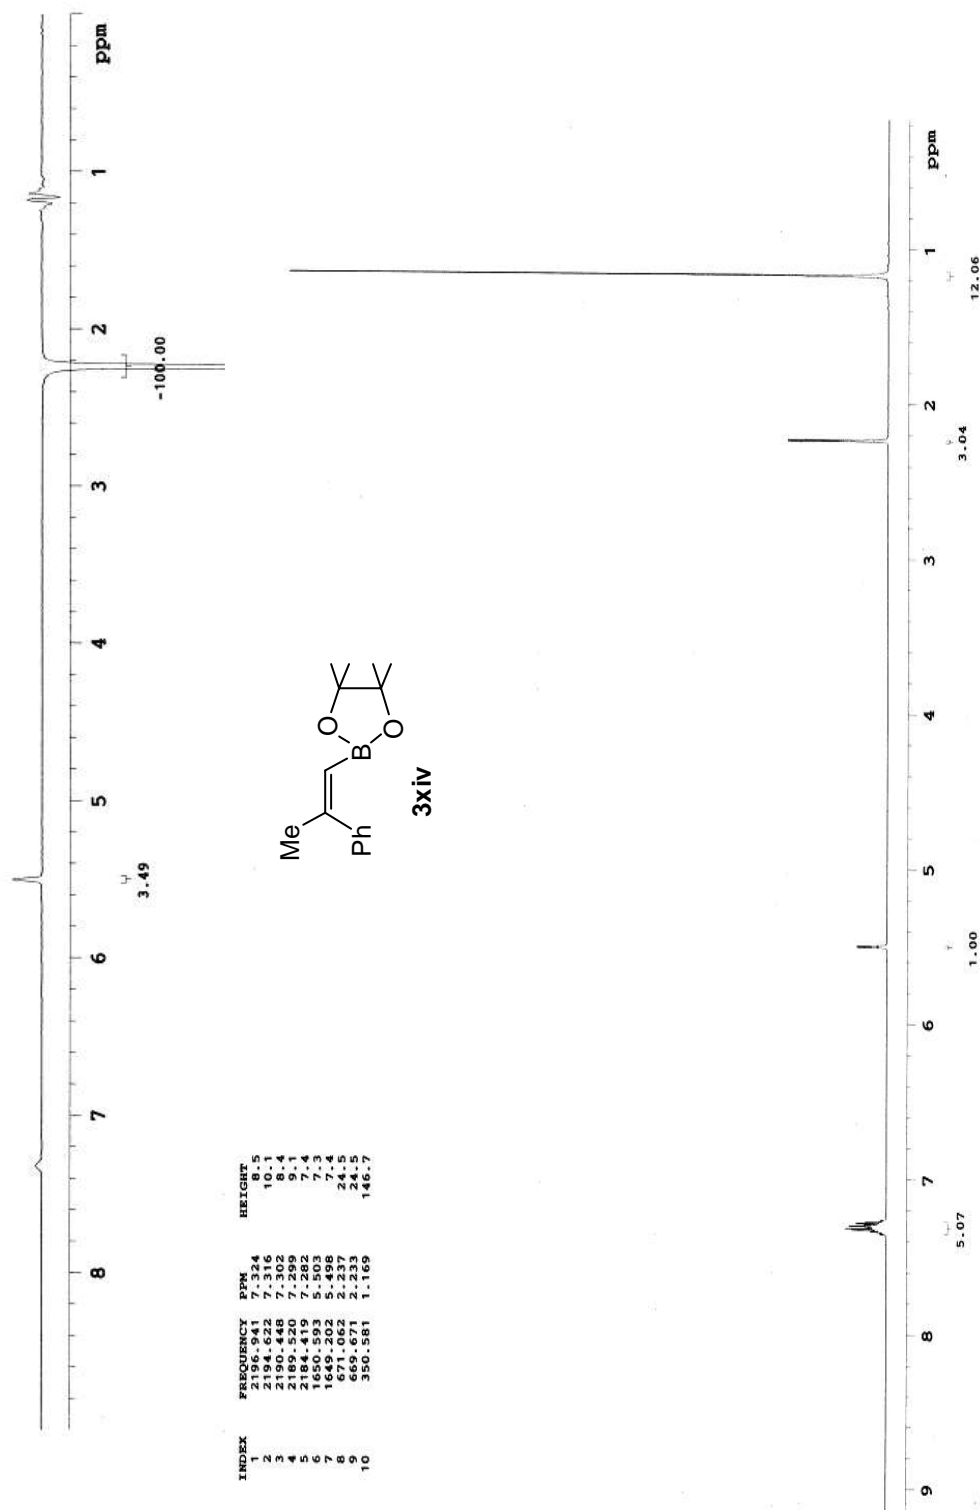



Highly Regio- and Stereoselective Synthesis of Z-Trisubstituted Alkenes via Propyne Bromoboration and Tandem Pd-Catalyzed Cross-Coupling

Chao Wang, Tomas Tobrman, Zhaoqing Xu, and Ei-ichi Negishi\*

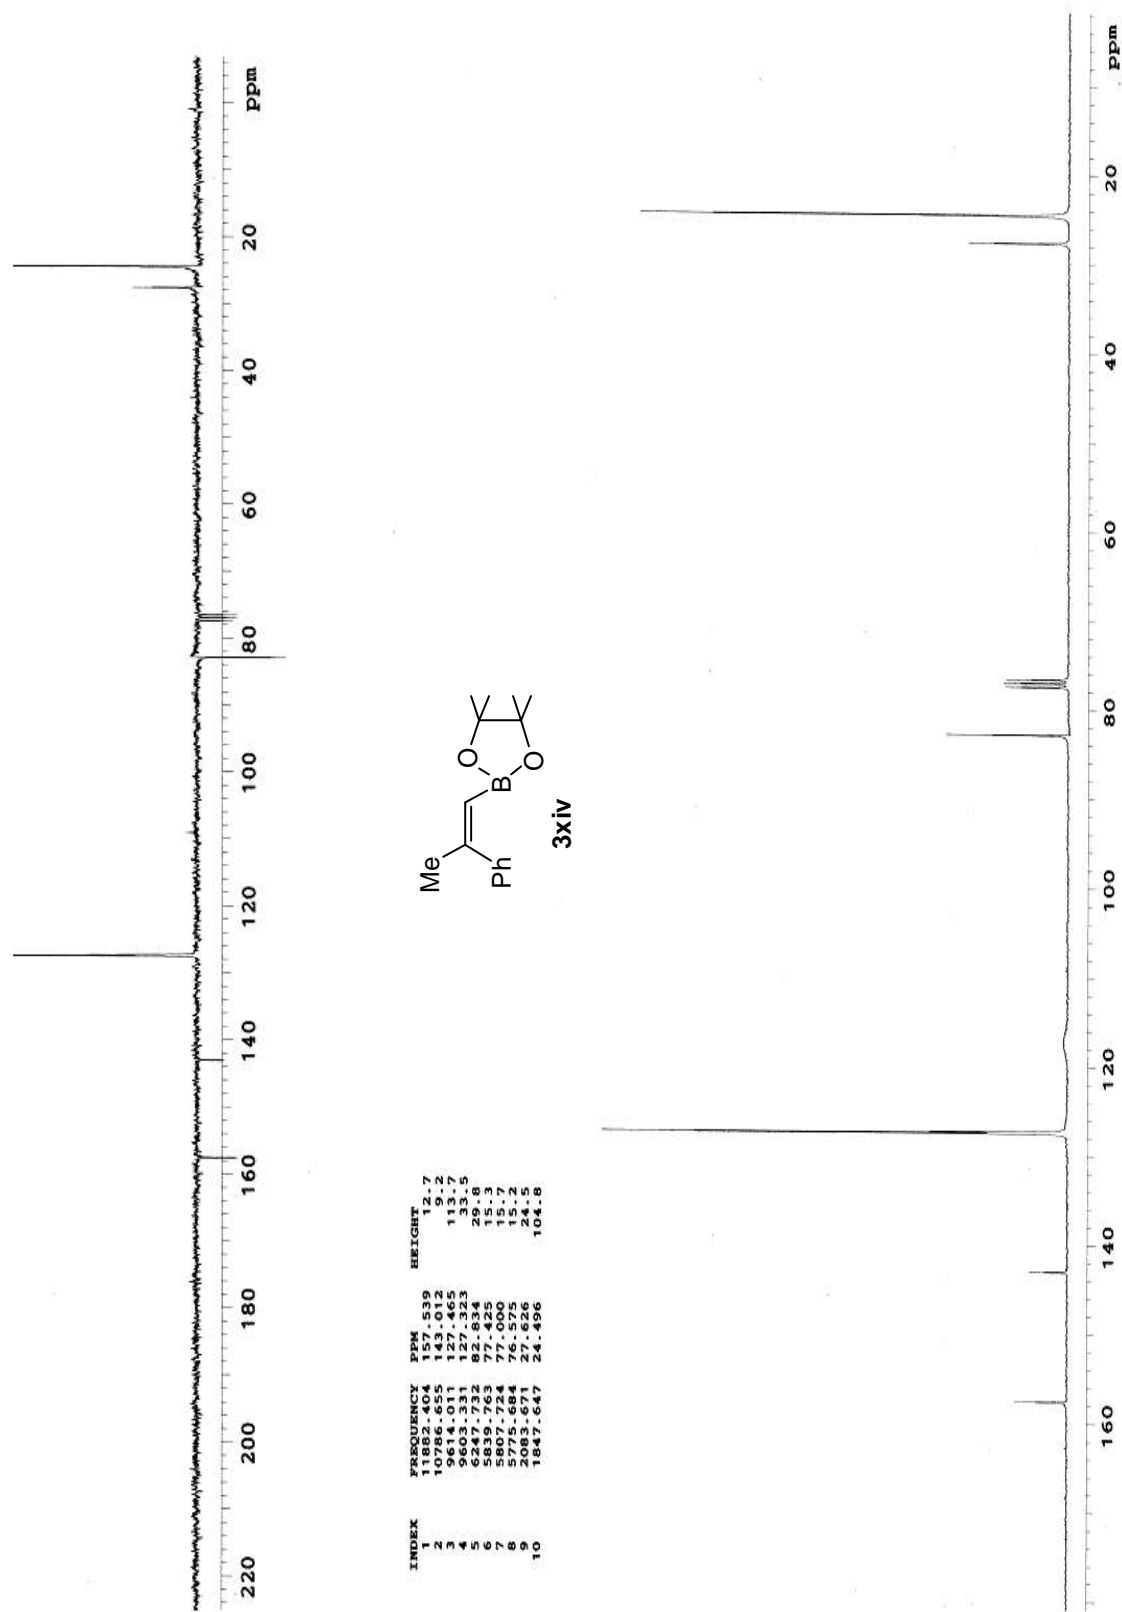

Highly Regio- and Stereoselective Synthesis of Z-Trisubstituted Alkenes via Propyne Bromoboration and Tandem Pd-Catalyzed Cross-Coupling

Chao Wang, Tomas Tobrman, Zhaoqing Xu, and Ei-ichi Negishi\*

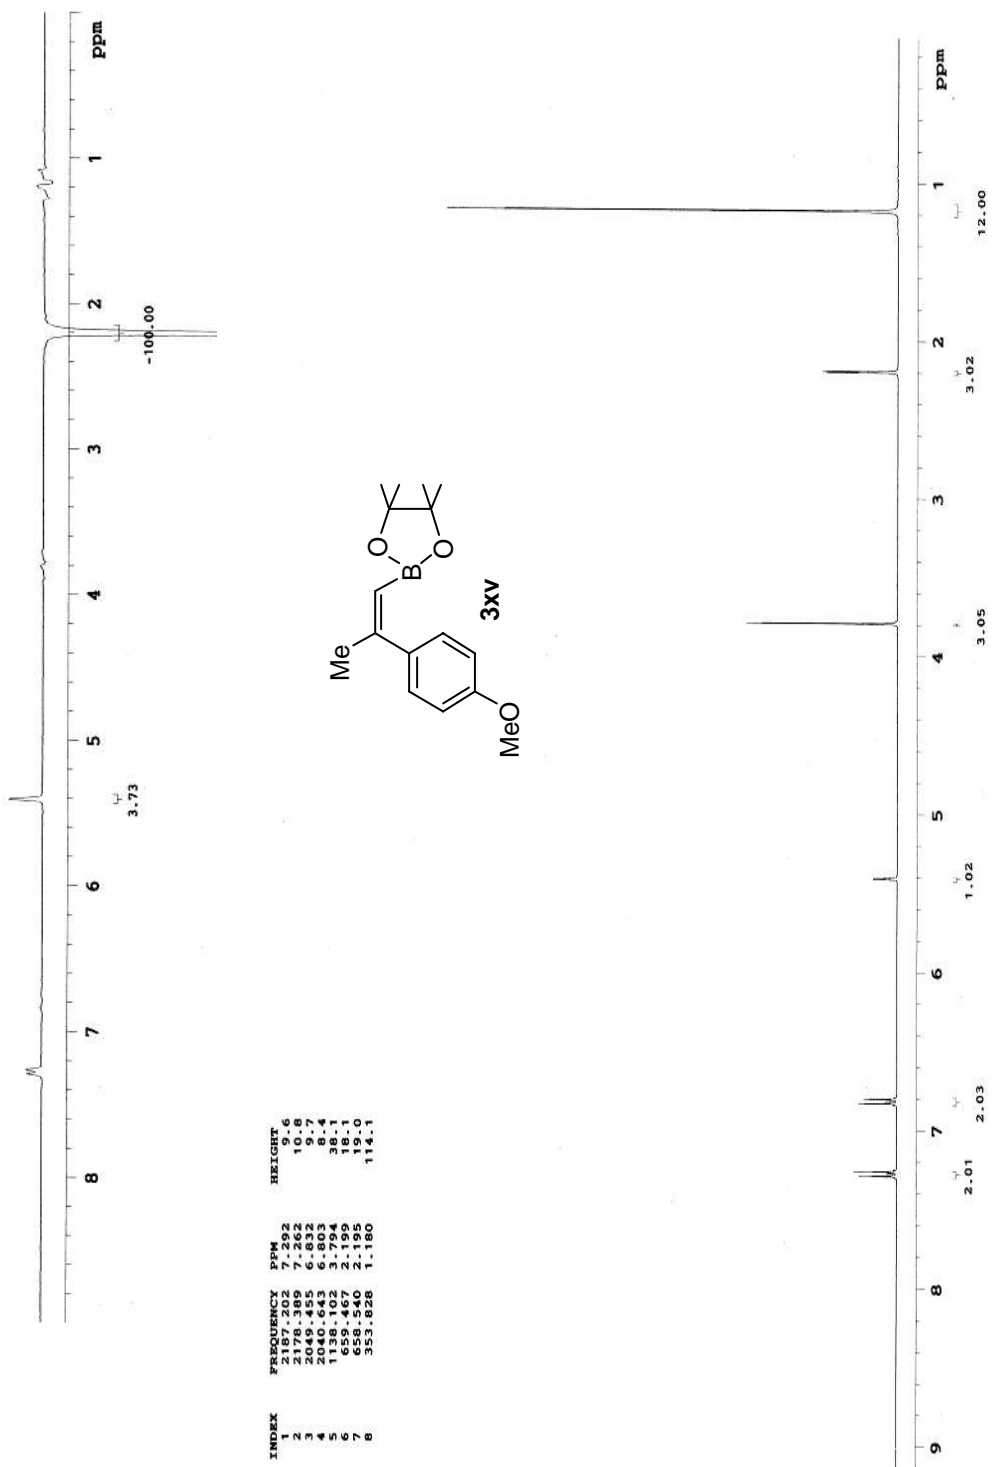

Highly Regio- and Stereoselective Synthesis of Z-Trisubstituted Alkenes via Propyne Bromoboration and Tandem Pd-Catalyzed Cross-Coupling

Chao Wang, Tomas Tobrman, Zhaoqing Xu, and Ei-ichi Negishi\*

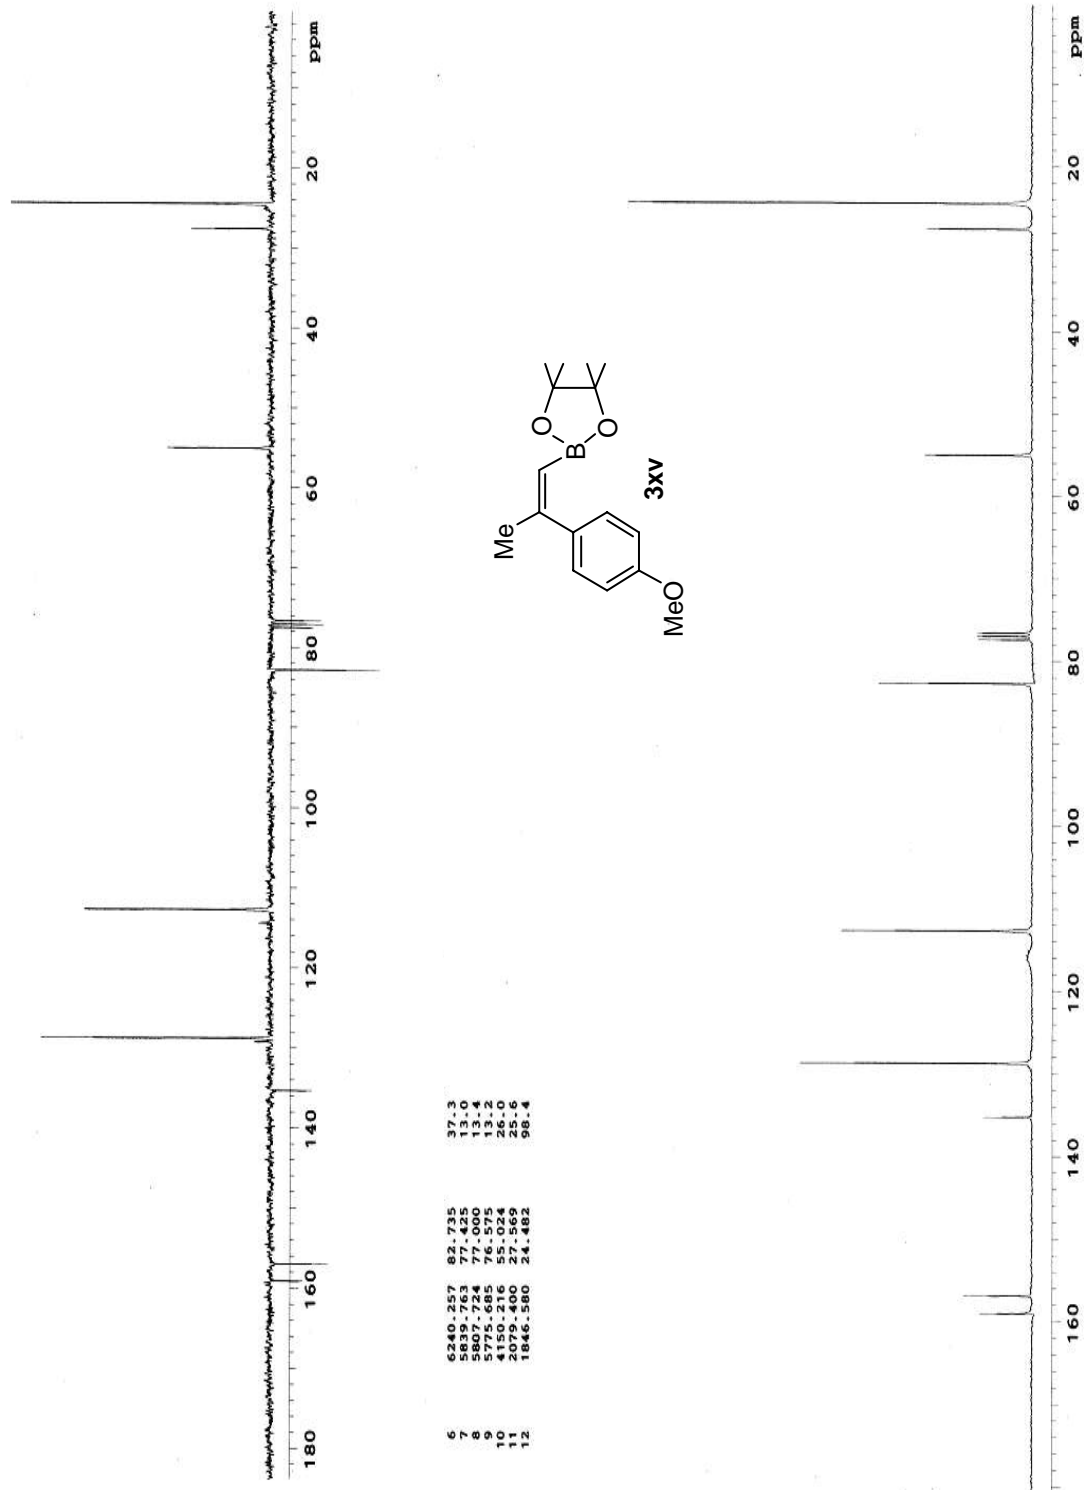

Chao Wang, Tomas Tobrman, Zhaoqing Xu, and Ei-ichi Negishi\*

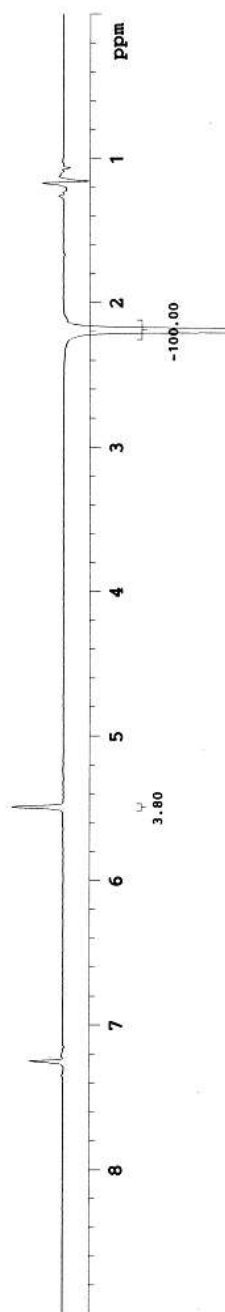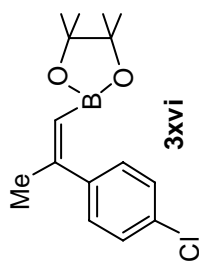

| INDEX | FREQUENCY | PPM   | HEIGHT |
|-------|-----------|-------|--------|
| 1     | 2174.679  | 7.250 | 48.0   |
| 2     | 1647.810  | 5.493 | 5.8    |
| 3     | 1647.810  | 5.493 | 5.8    |
| 4     | 656.685   | 2.189 | 21.9   |
| 5     | 655.293   | 2.185 | 22.0   |
| 6     | 348.726   | 1.163 | 140.9  |

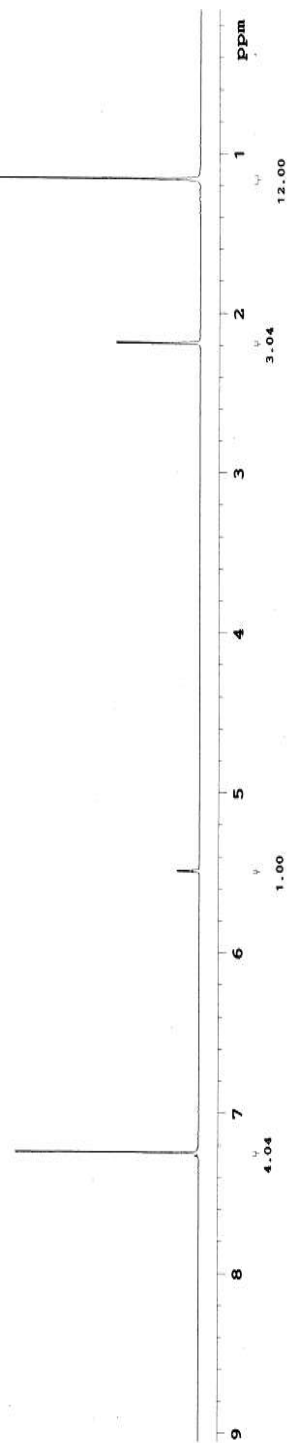

Chao Wang, Tomas Tobrman, Zhaoqing Xu, and Ei-ichi Negishi\*

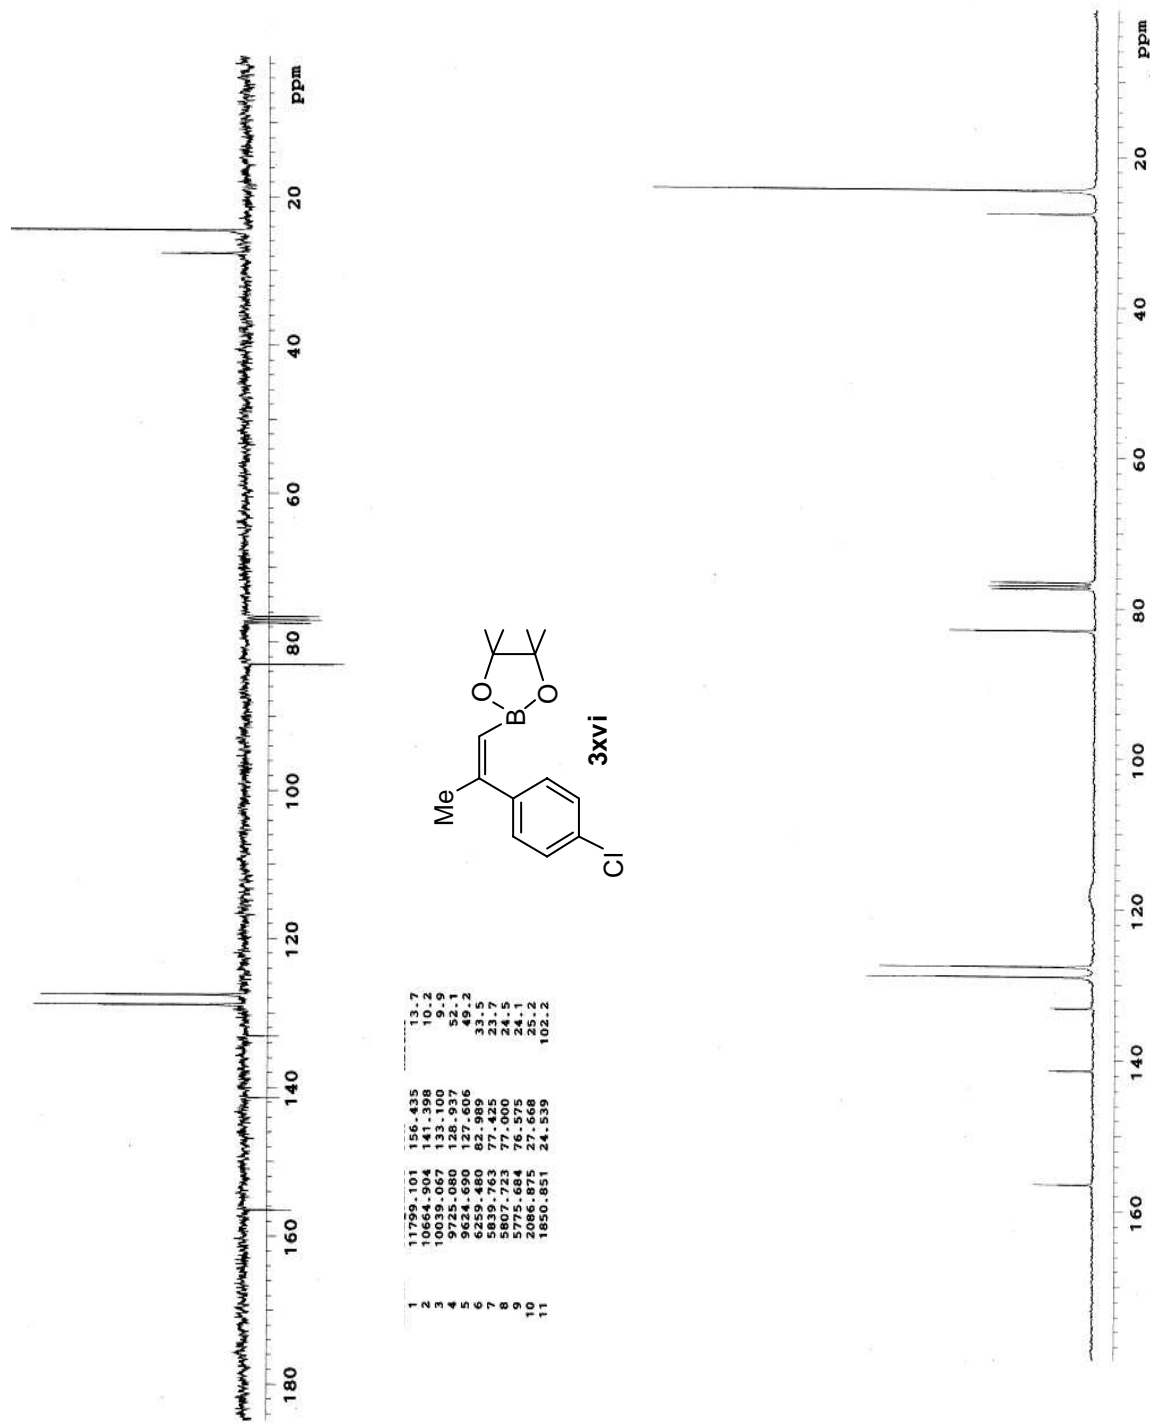

Highly Regio- and Stereoselective Synthesis of Z-Trisubstituted Alkenes via Propyne Bromoboration and Tandem Pd-Catalyzed Cross-Coupling

Chao Wang, Tomas Tobrman, Zhaoqing Xu, and Ei-ichi Negishi\*

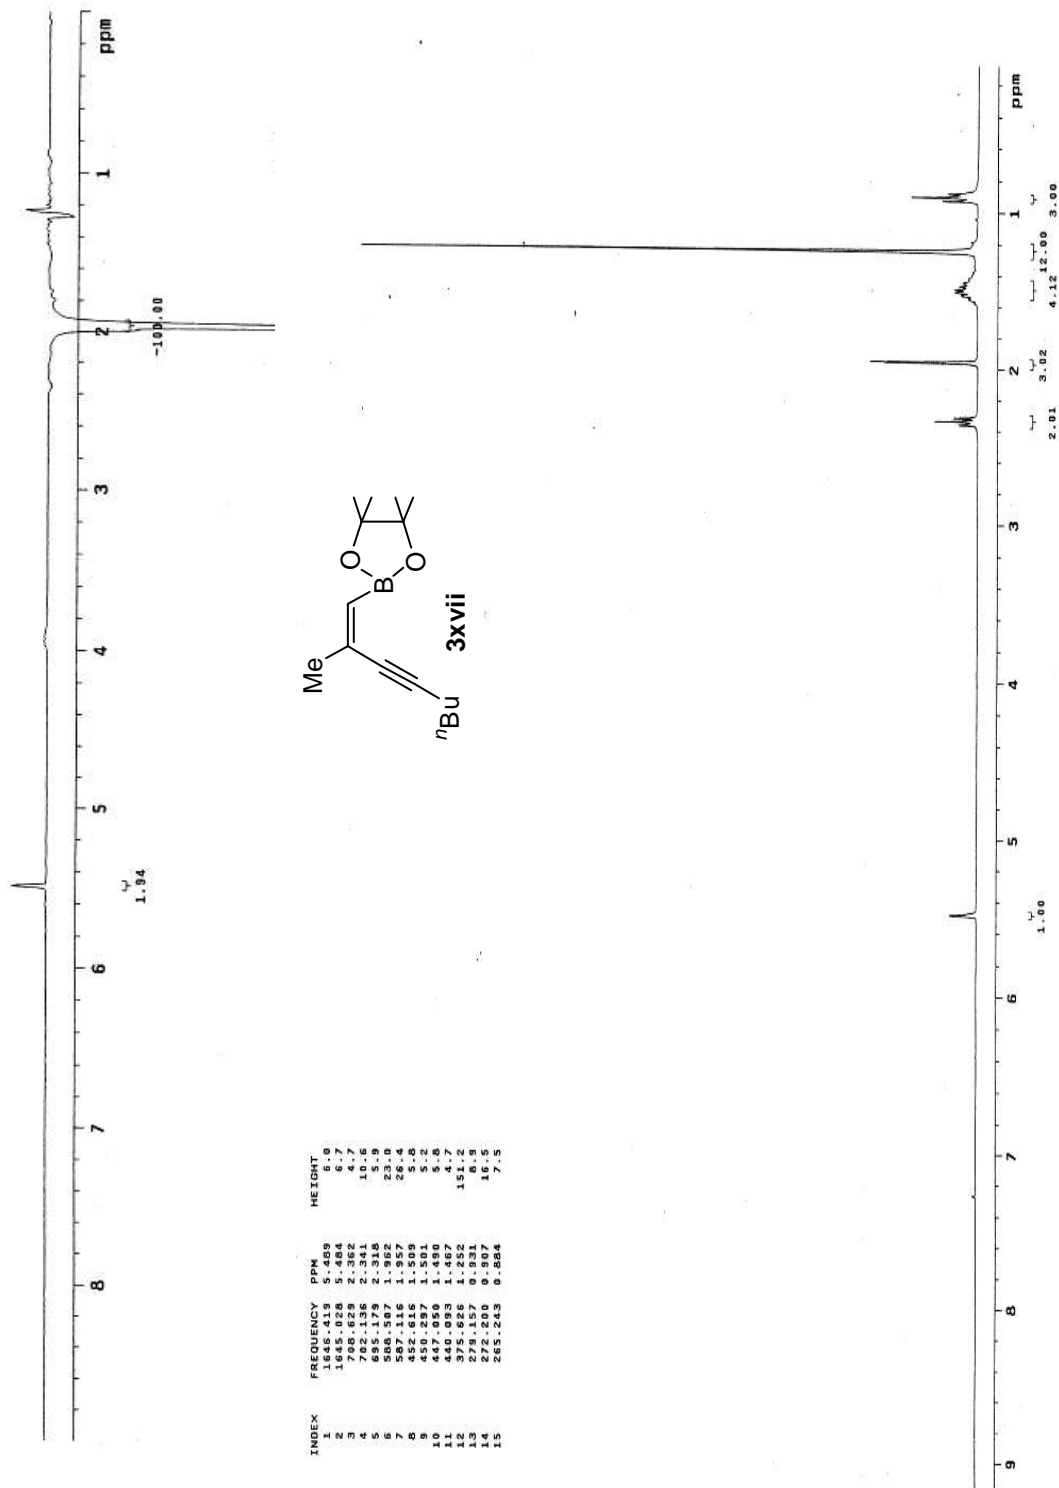

Chao Wang, Tomas Tobrman, Zhaoqing Xu, and Ei-ichi Negishi\*

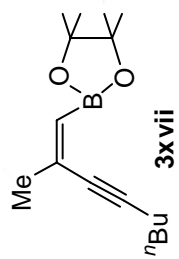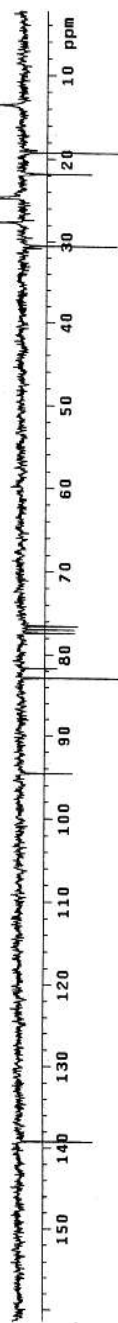

| INDEX | FREQUENCY | PPM     | WEIGHT |
|-------|-----------|---------|--------|
| 1     | 10592.839 | 139.239 | 14.6   |
| 2     | 7236.879  | 84.614  | 11.2   |
| 3     | 6166.565  | 81.758  | 9.1    |
| 4     | 5892.763  | 77.825  | 54.9   |
| 5     | 5775.684  | 76.575  | 255.9  |
| 6     | 2896.519  | 29.595  | 32.9   |
| 7     | 1866.871  | 24.751  | 124.2  |
| 8     | 1454.849  | 12.898  | 21.7   |
| 9     | 1025.801  | 13.594  | 28.1   |

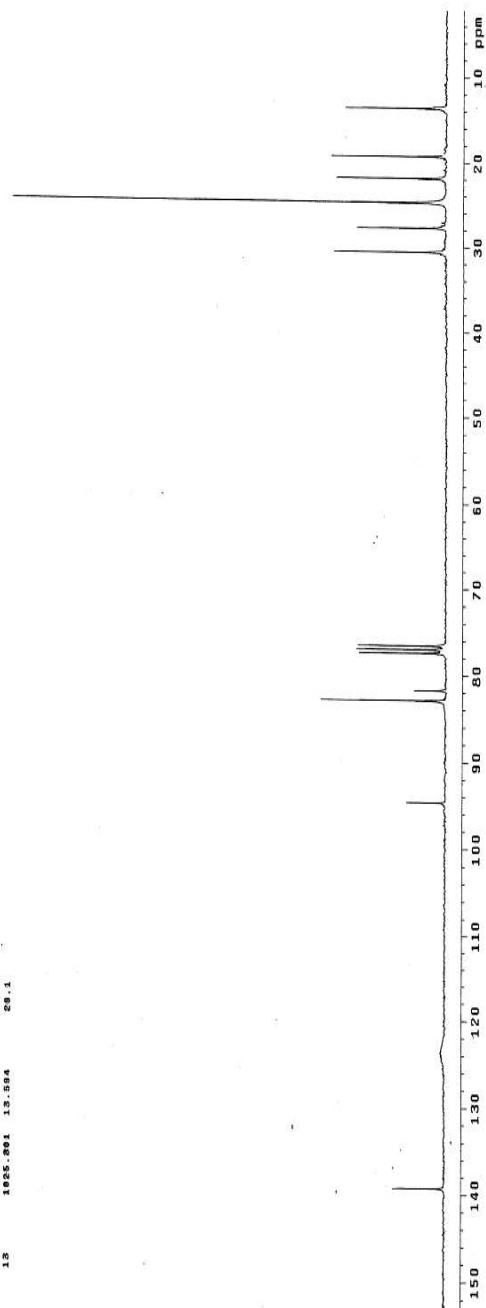

Highly Regio- and Stereoselective Synthesis of Z-Trisubstituted Alkenes via Propyne  
 Bromoboration and Tandem Pd-Catalyzed Cross-Coupling  
 Chao Wang, Tomas Tobrman, Zhaoqing Xu, and Ei-ichi Negishi\*

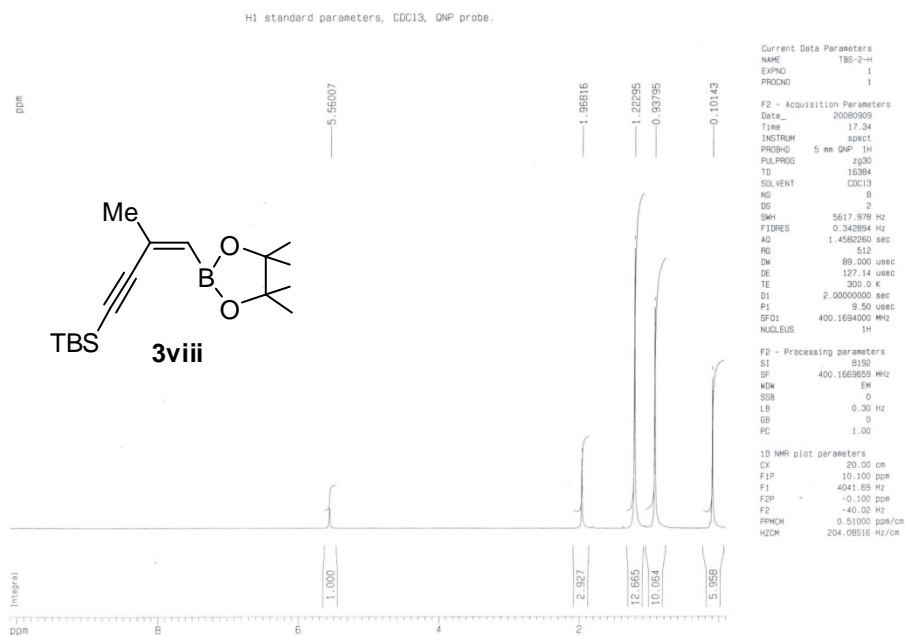

Turn spinning off.  
 Data Collected on: inova300-1-inova1freq  
 Archive directory: /home/tobrman/nmr/syb/data  
 Sample directory: /  
 F1ID: cyclenoe  
 Pulse Sequence: cyclenoe  
 Solvent: CDCl<sub>3</sub>  
 Temp: 30.0 C / 303.0 K  
 Relax delay: 4.100 sec  
 Pulse 190.0 degrees  
 Mixing: 0.000 sec  
 Acq. time: 2.150 sec  
 Date\_ Time: 08/25/08 11:28.5588024 MHz  
 16. Frequencies:  
 OBSERVED: H1: 289.5588024 MHz  
 Data Processing:  
 Line broadening: 1.0 Hz  
 F2: size: 16384  
 Total time: 7 min

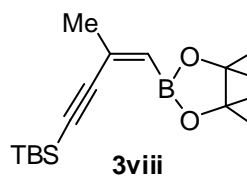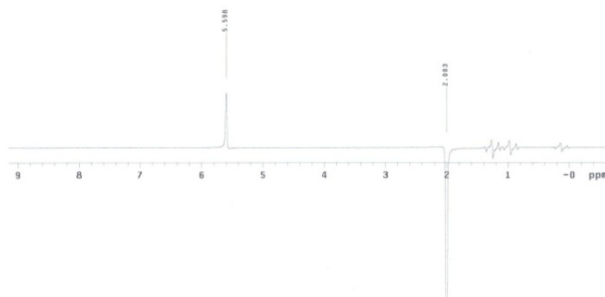



# Highly Regio- and Stereoselective Synthesis of Z-Trisubstituted Alkenes via Propyne Bromoboration and Tandem Pd-Catalyzed Cross-Coupling

Chao Wang, Tomas Tobrman, Zhaoqing Xu, and Ei-ichi Negishi\*

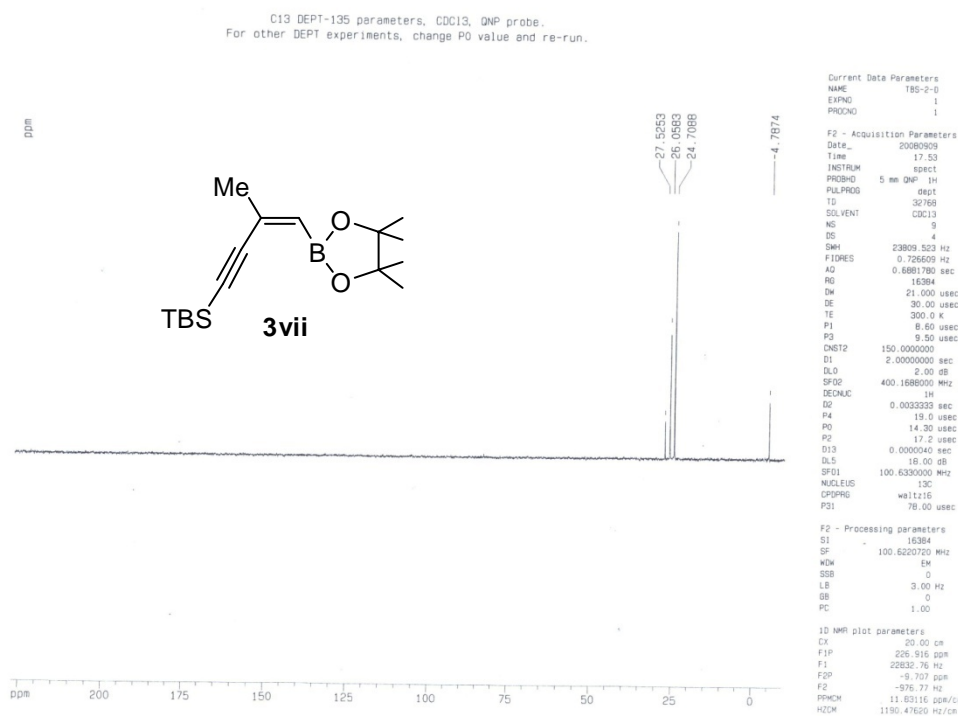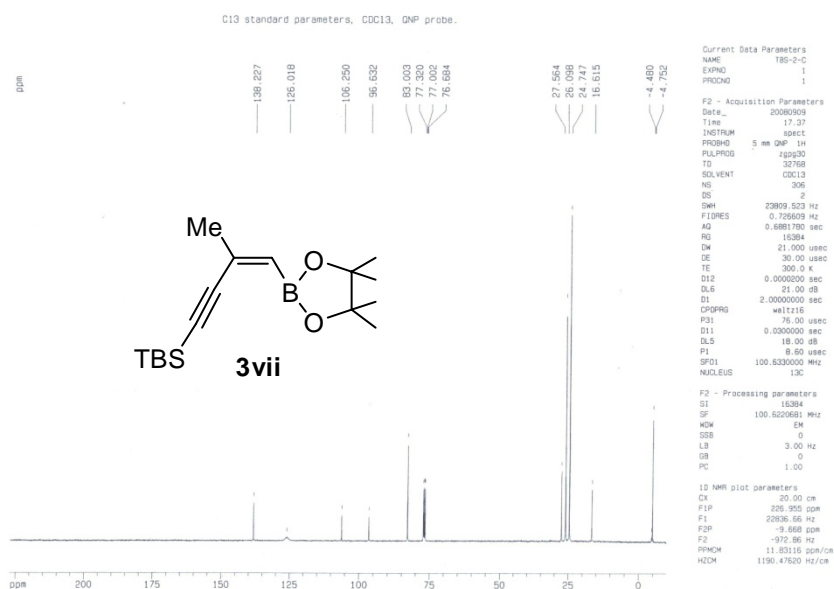

Chao Wang, Tomas Tobrman, Zhaoqing Xu, and Ei-ichi Negishi\*

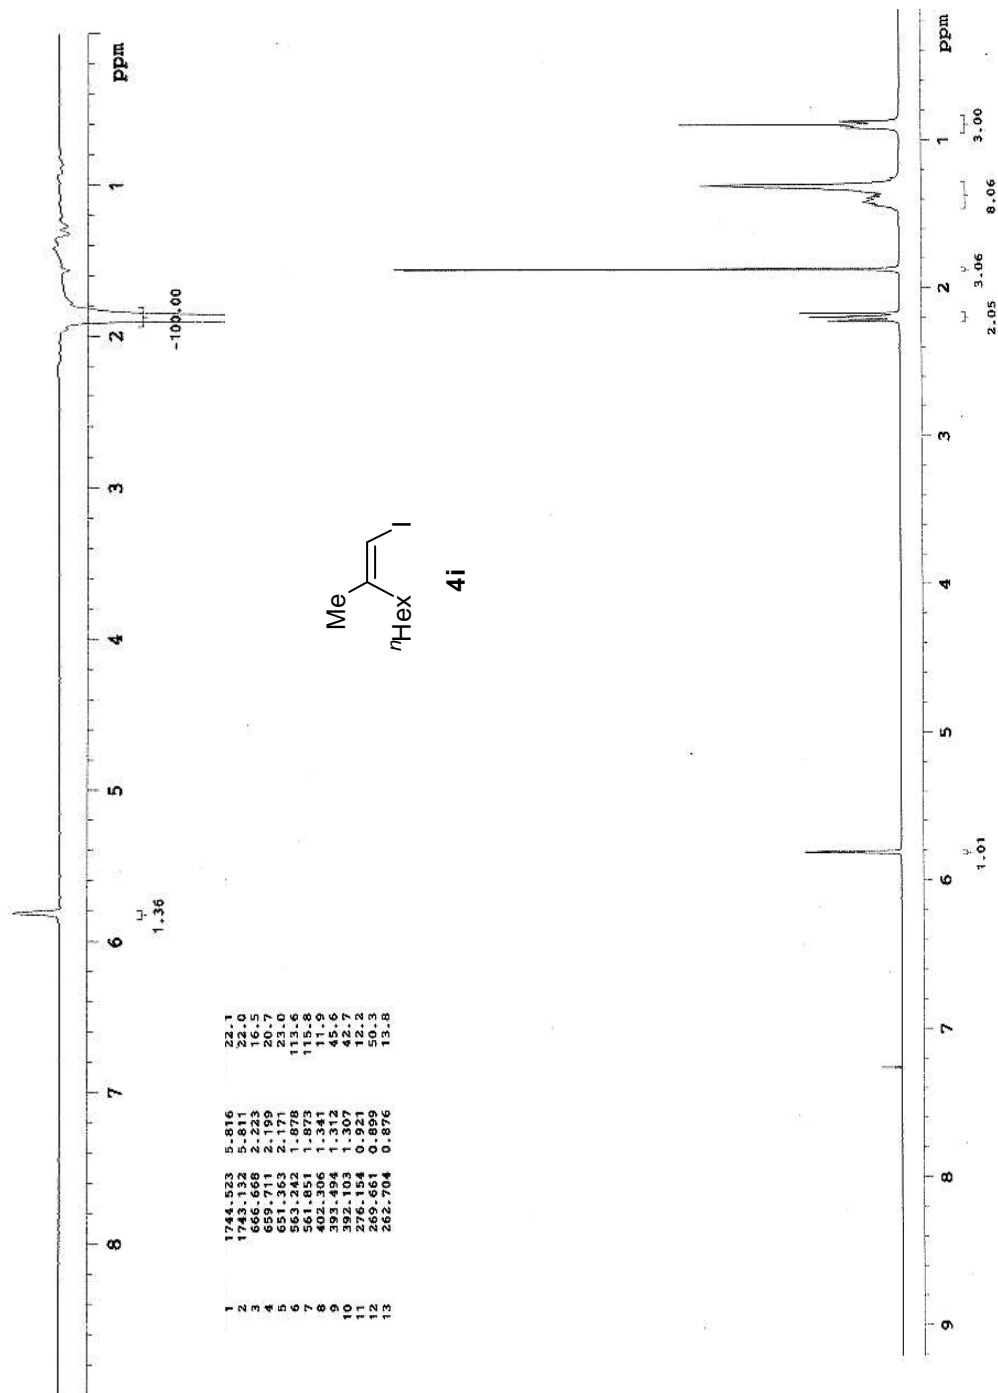

Chao Wang, Tomas Tobrman, Zhaoqing Xu, and Ei-ichi Negishi\*

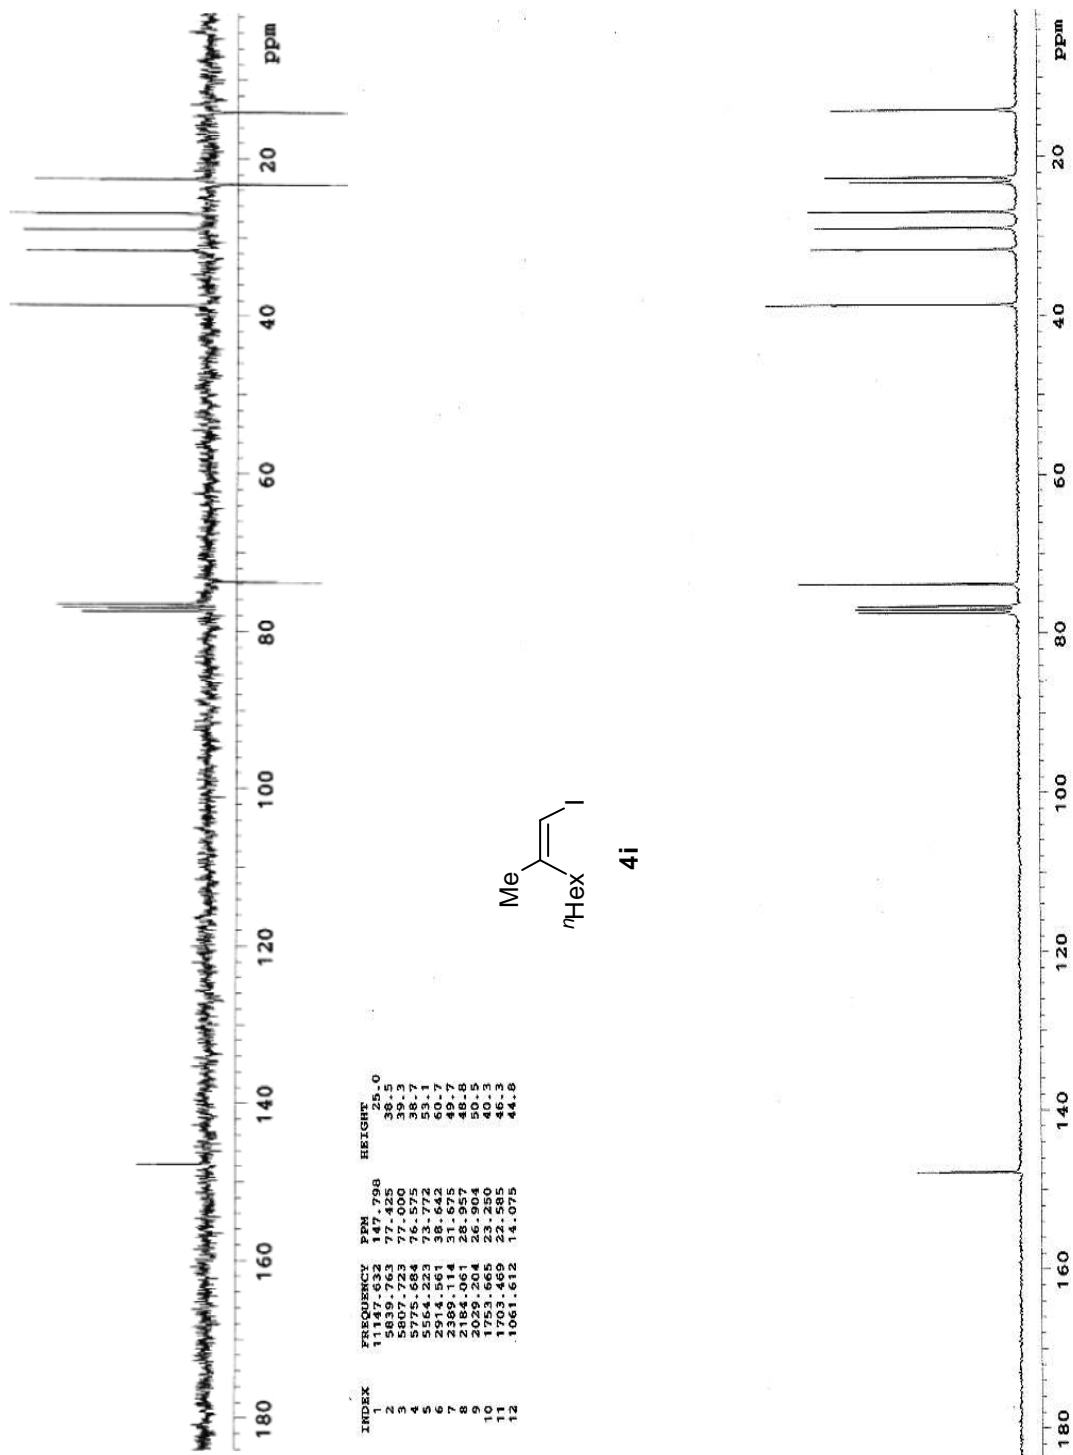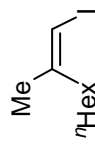

4i

Chao Wang, Tomas Tobrman, Zhaoqing Xu, and Ei-ichi Negishi\*

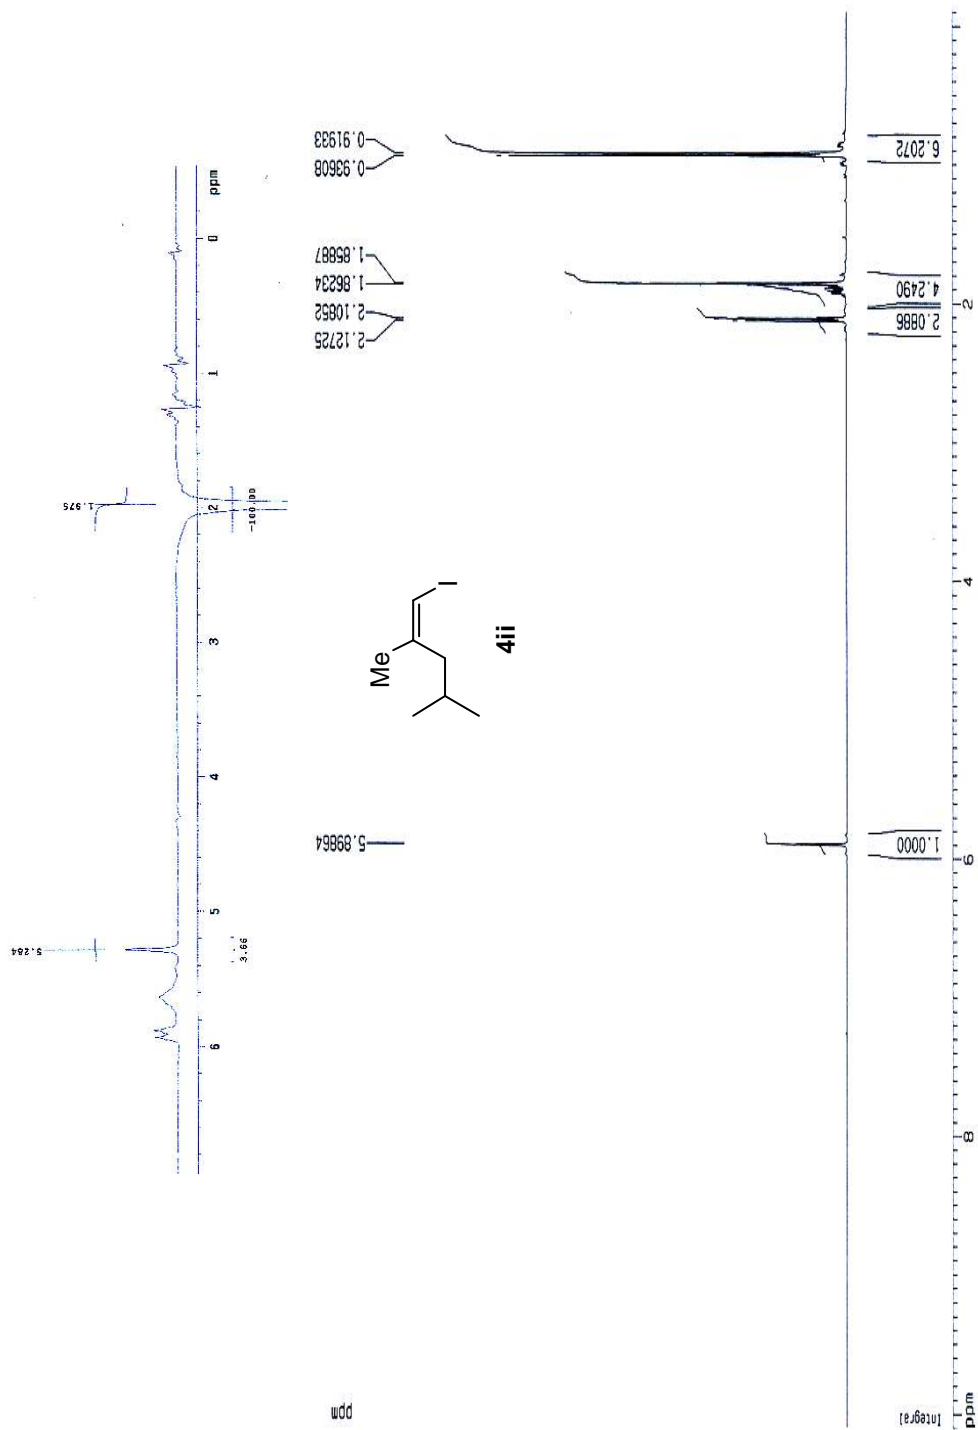

Chao Wang, Tomas Tobrman, Zhaoping Xu, and Ei-ichi Negishi\*

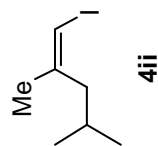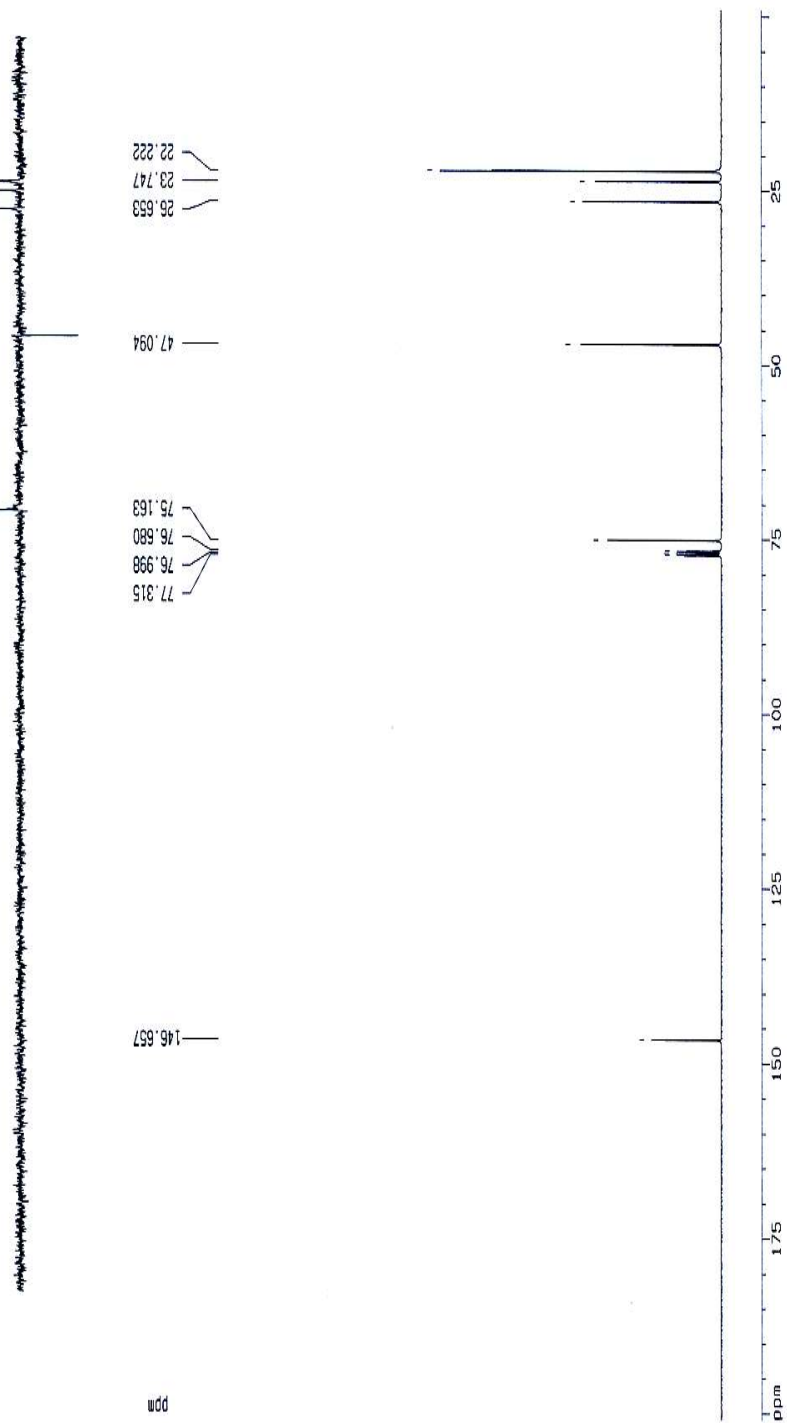

Chao Wang, Tomas Tobrman, Zhaoqing Xu, and Ei-ichi Negishi\*

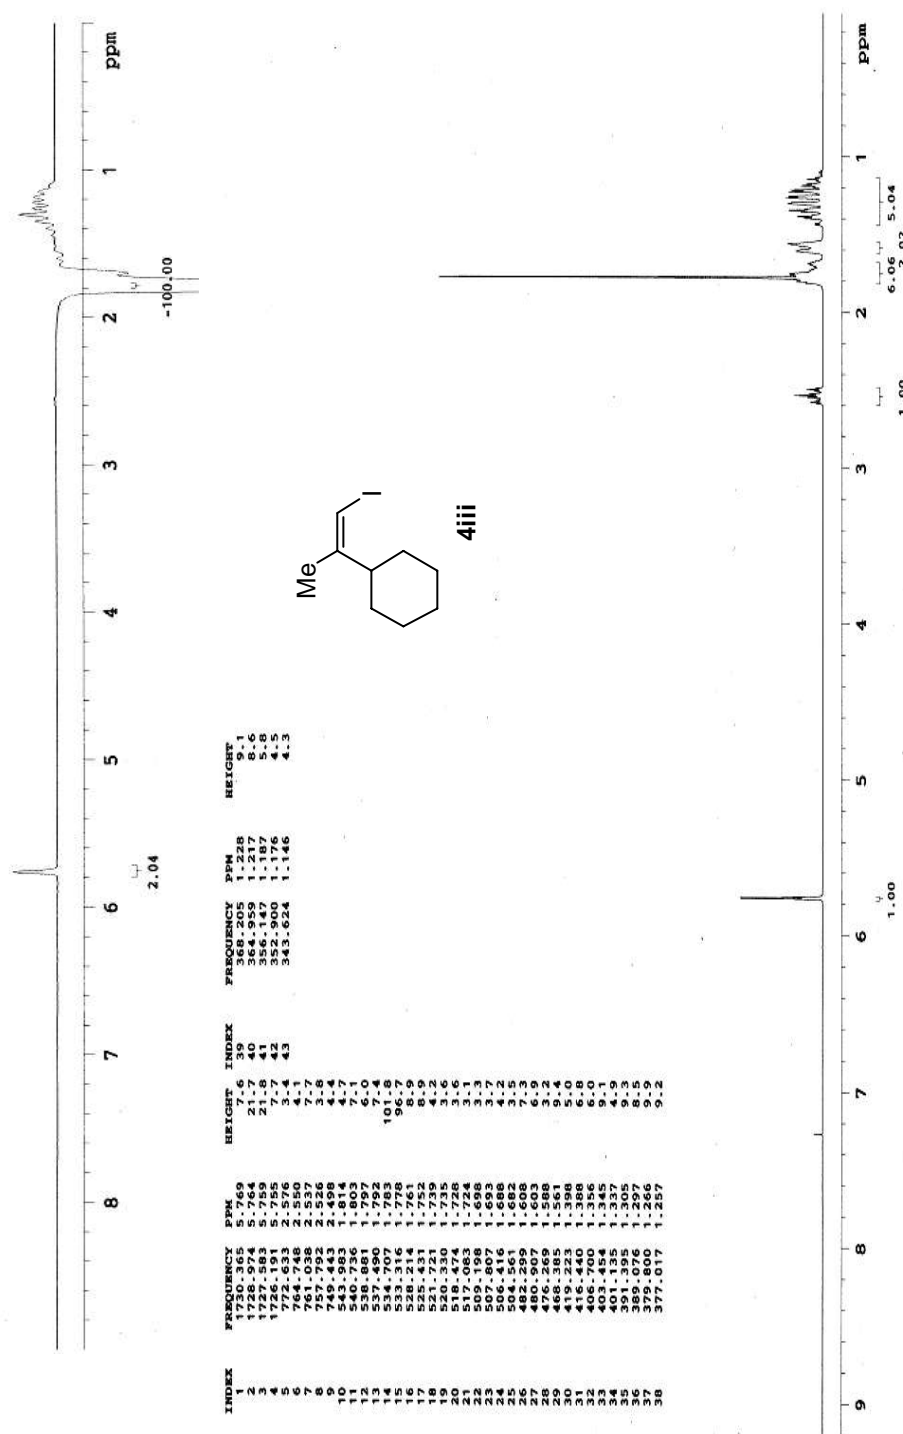

Chao Wang, Tomas Tobrman, Zhaoqing Xu, and Ei-ichi Negishi\*

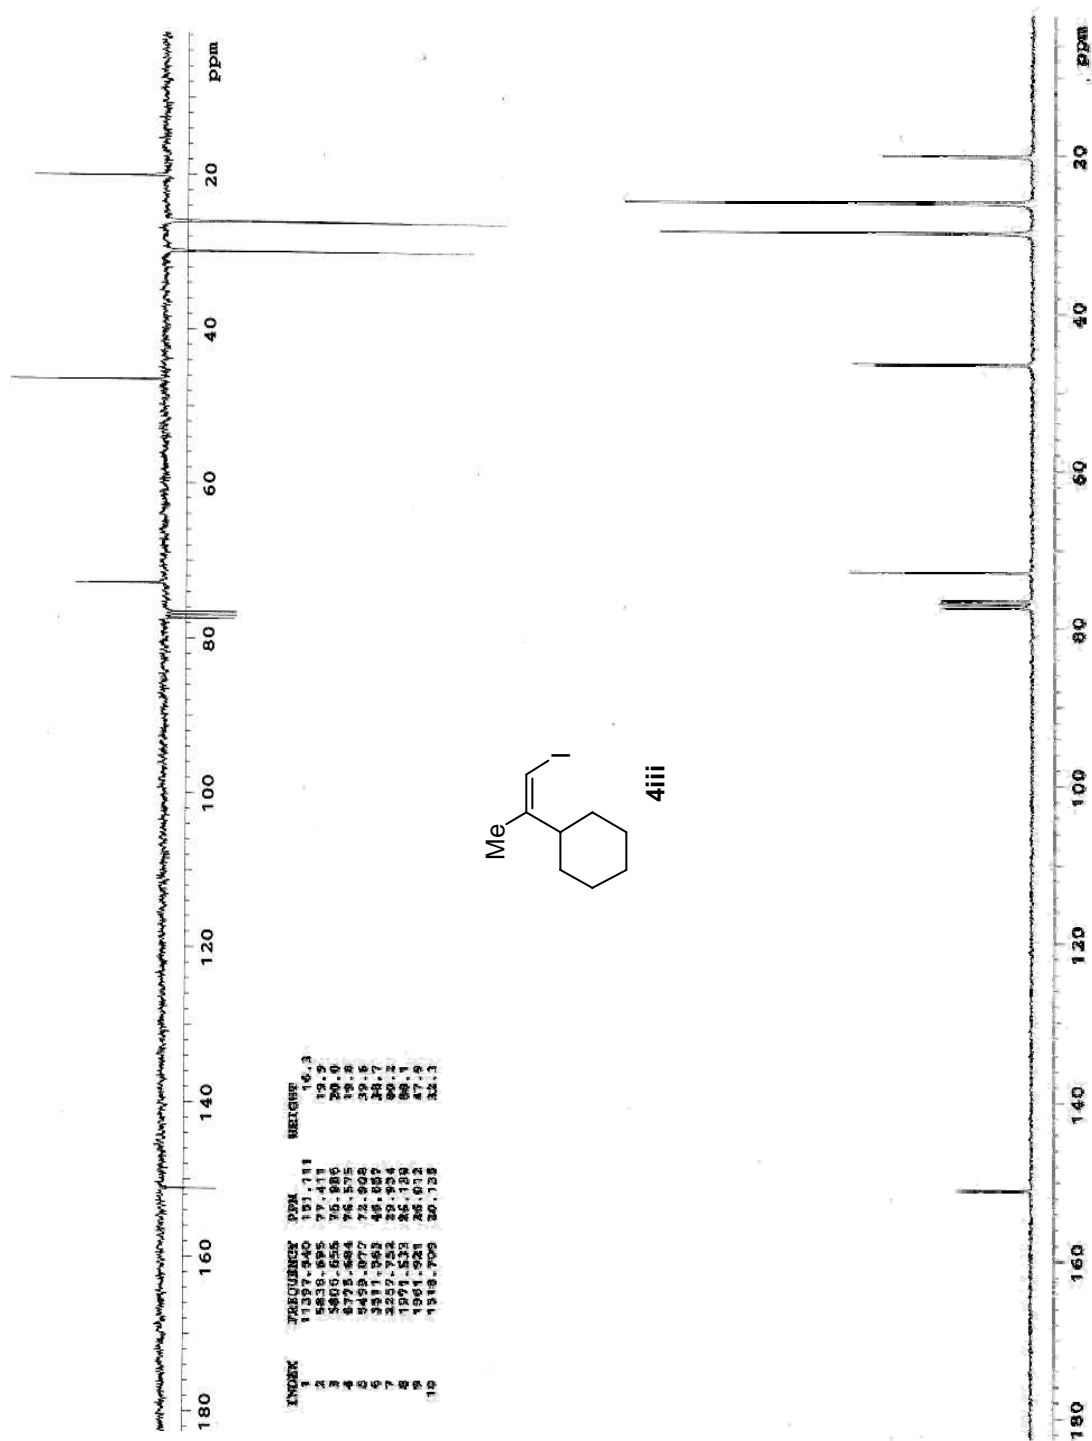

Chao Wang, Tomas Tobrman, Zhaodong Xu, and Ei-ichi Negishi\*

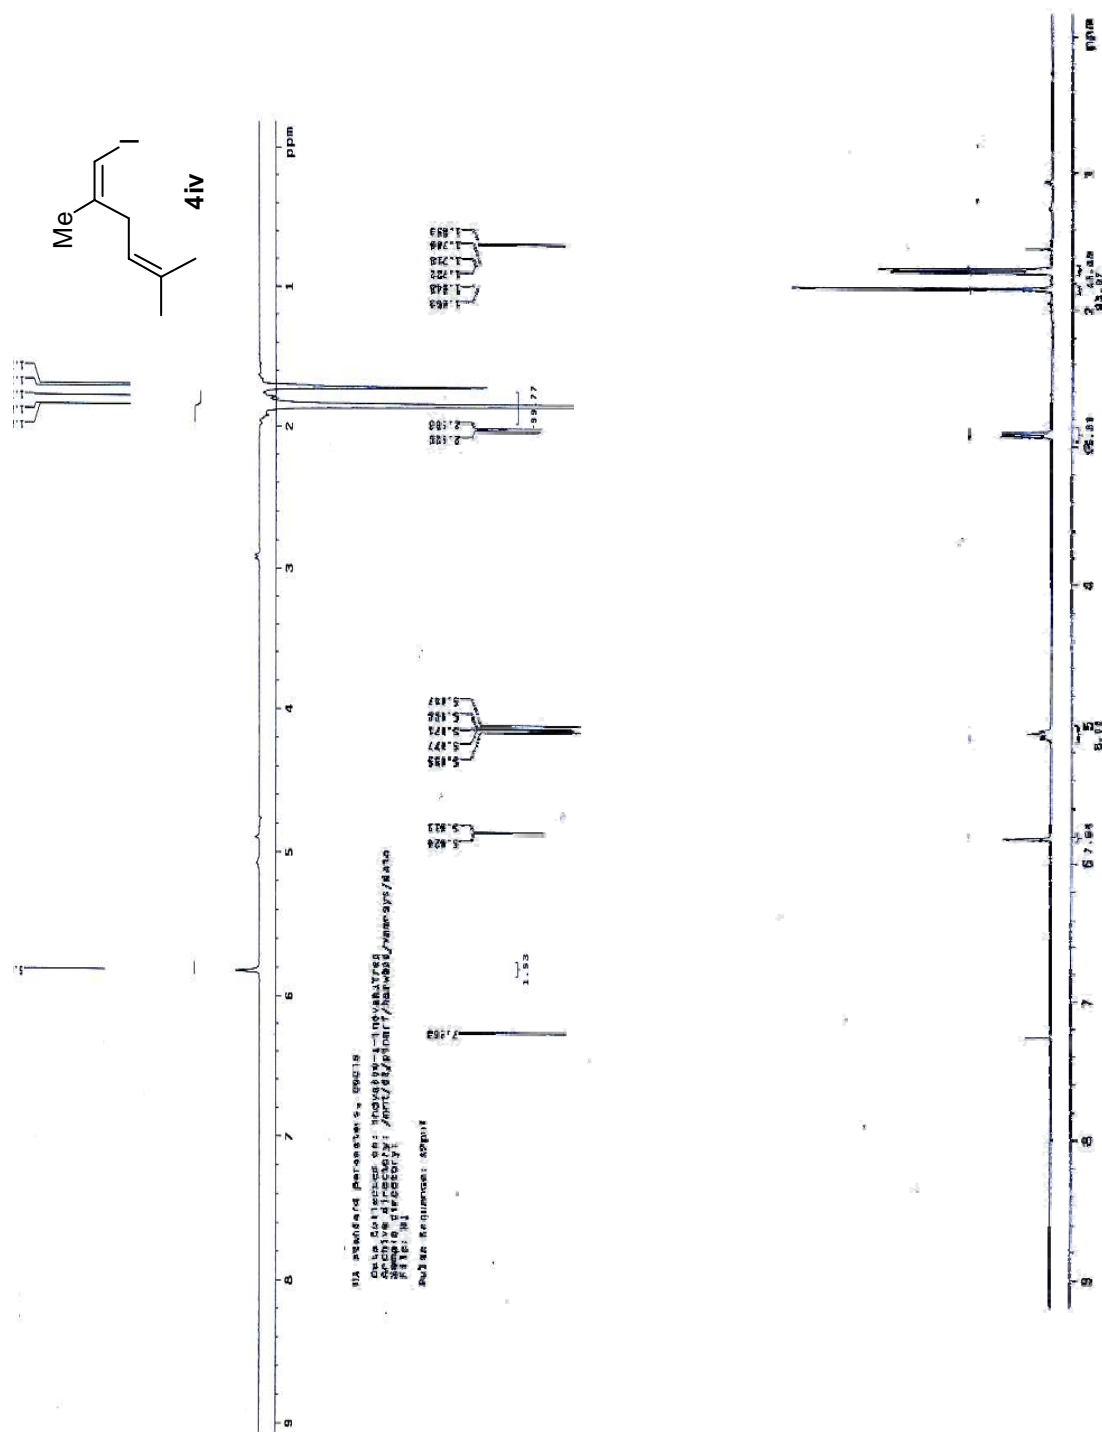



Chao Wang, Tomas Tobrman, Zhaoqing Xu, and Ei-ichi Negishi\*

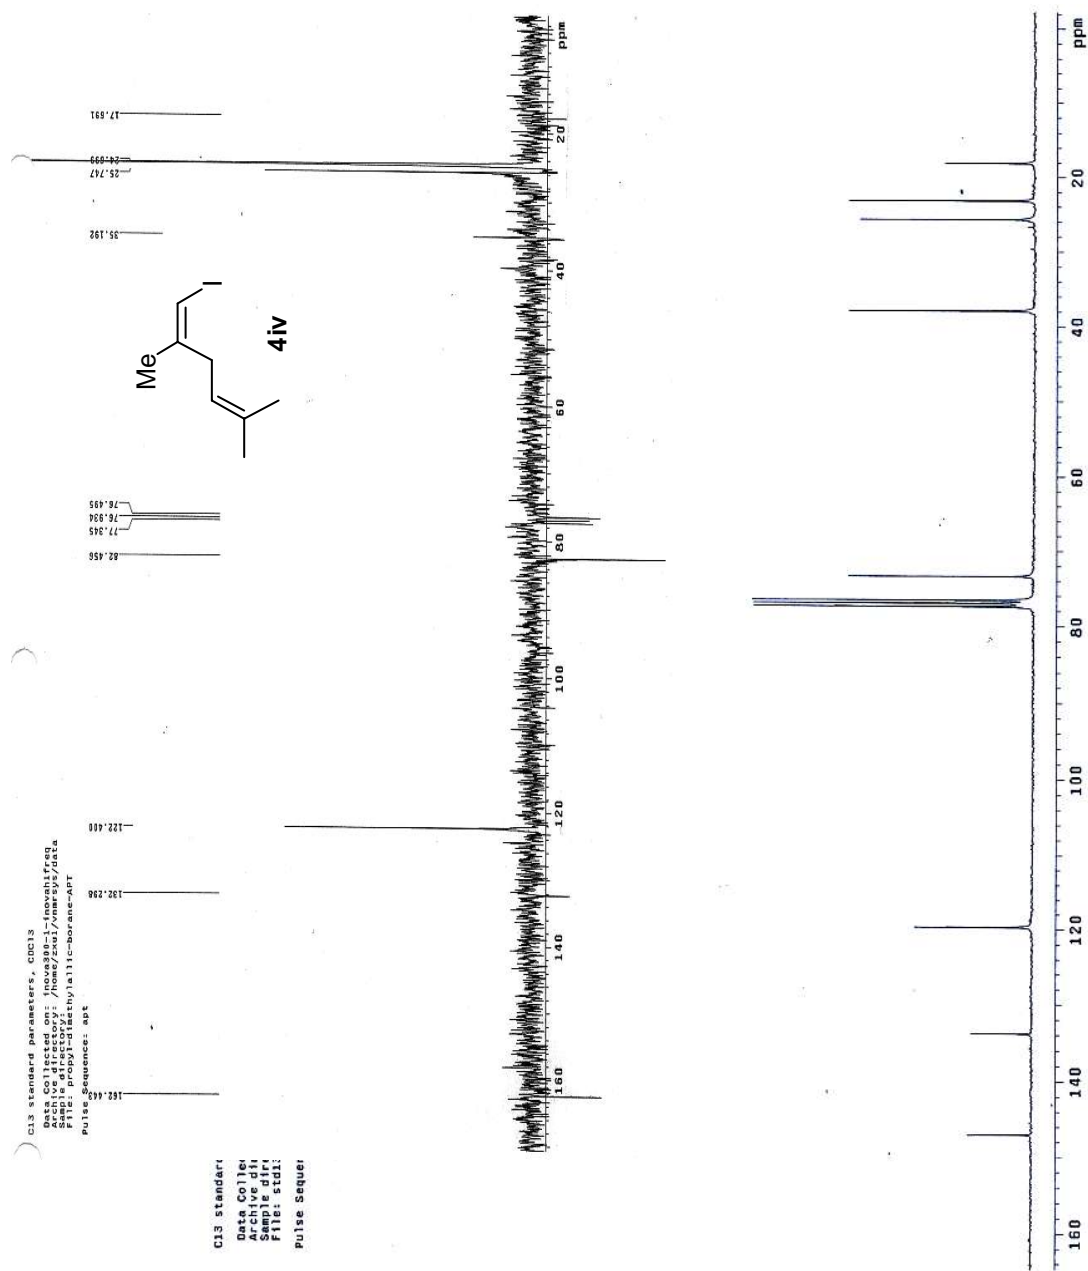

Chao Wang, Tomas Tobrman, Zhaoqing Xu, and Ei-ichi Negishi\*

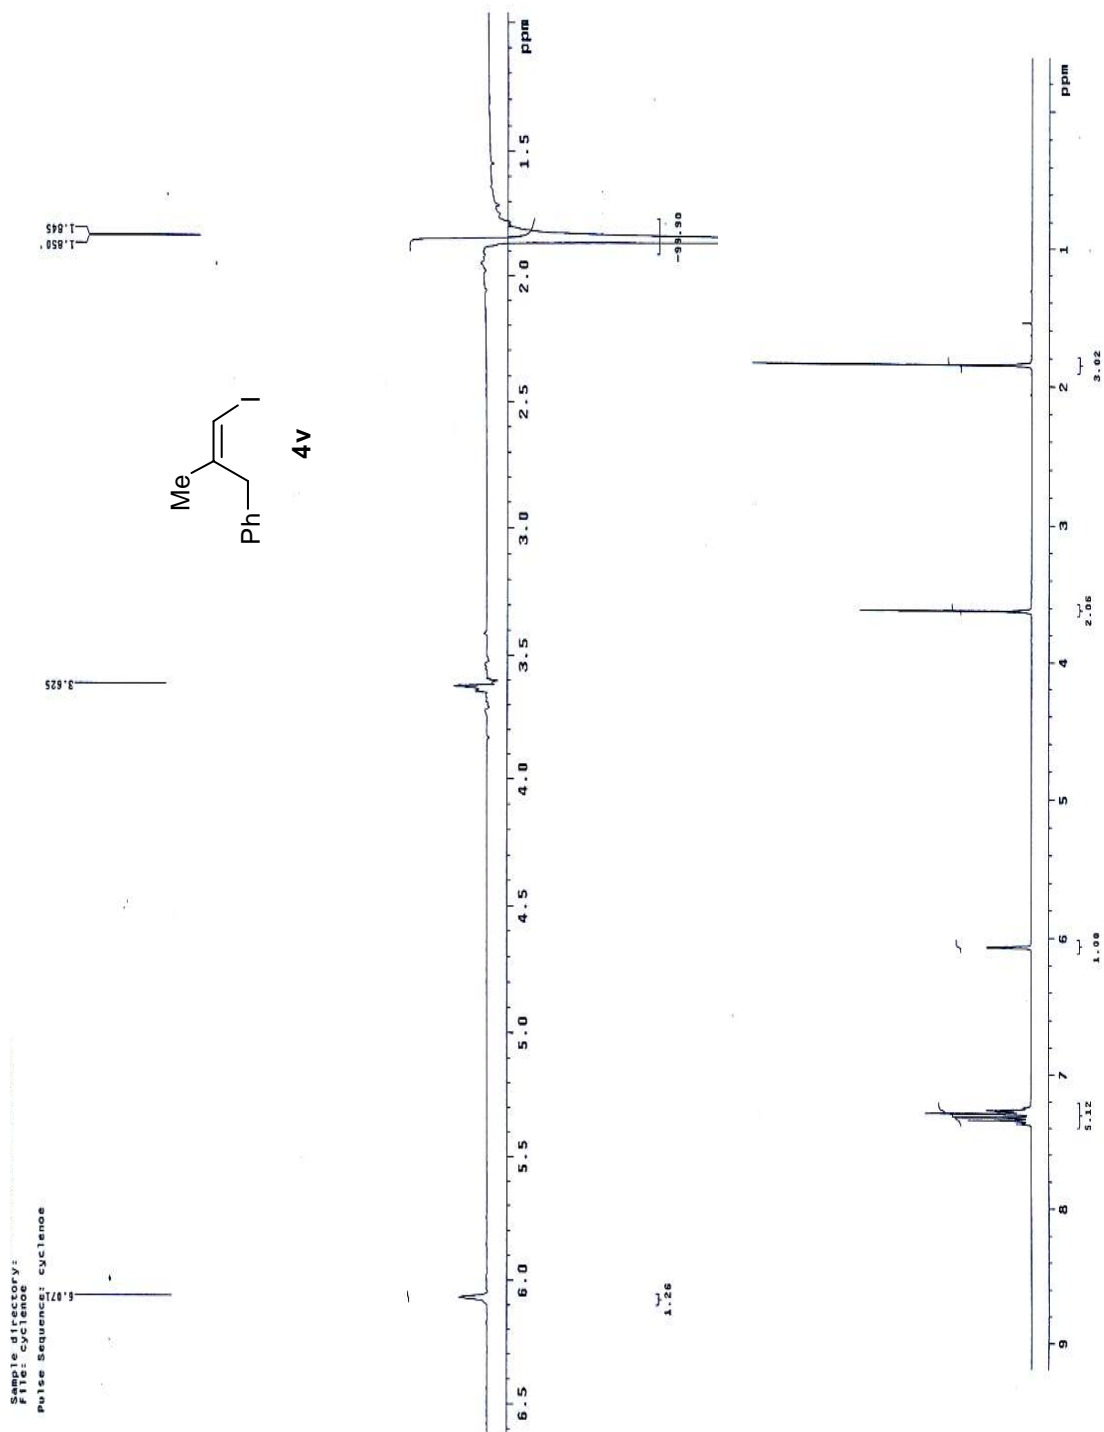

Chao Wang, Tomas Tobrman, Zhaoqing Xu, and Ei-ichi Negishi\*

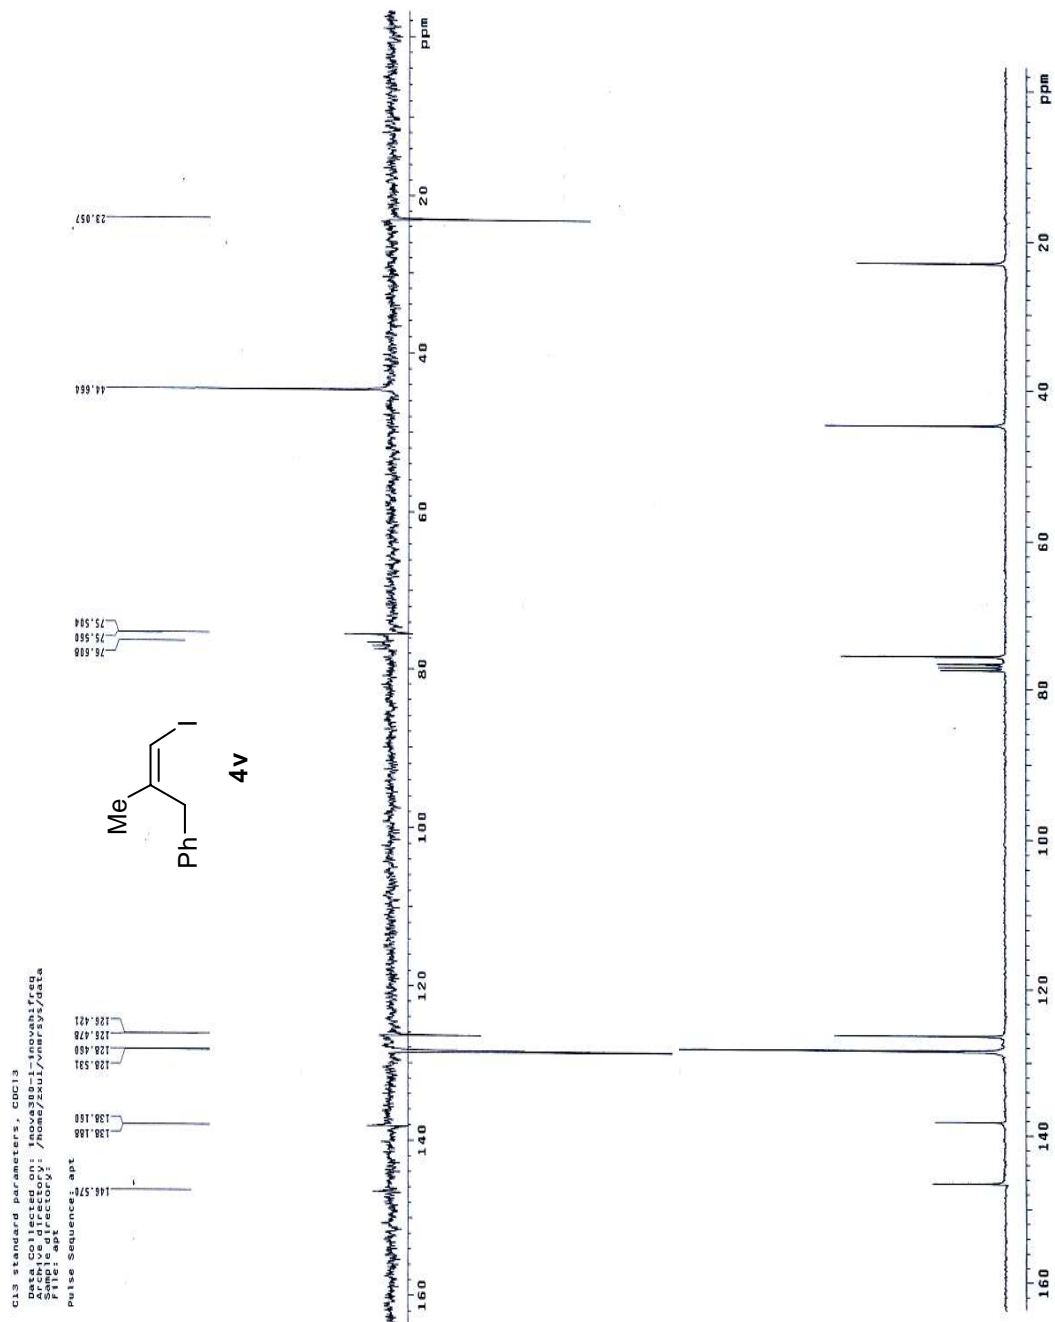

Highly Regio- and Stereoselective Synthesis of Z-Trisubstituted Alkenes via Propyne Bromoboration and Tandem Pd-Catalyzed Cross-Coupling

Chao Wang, Tomas Tobrman, Zhaoqing Xu, and Ei-ichi Negishi\*

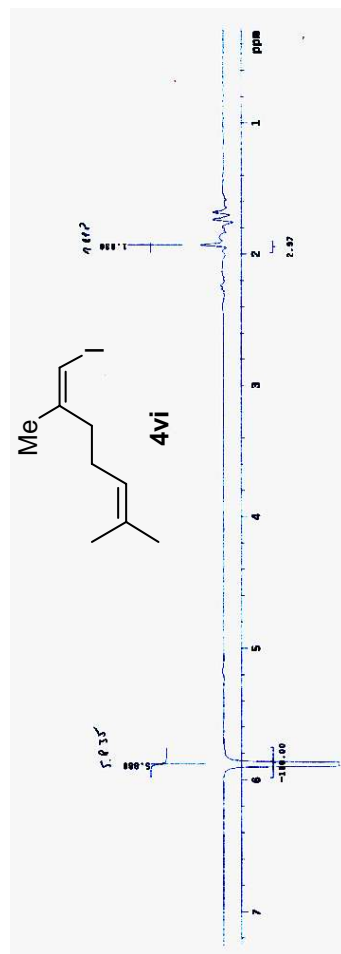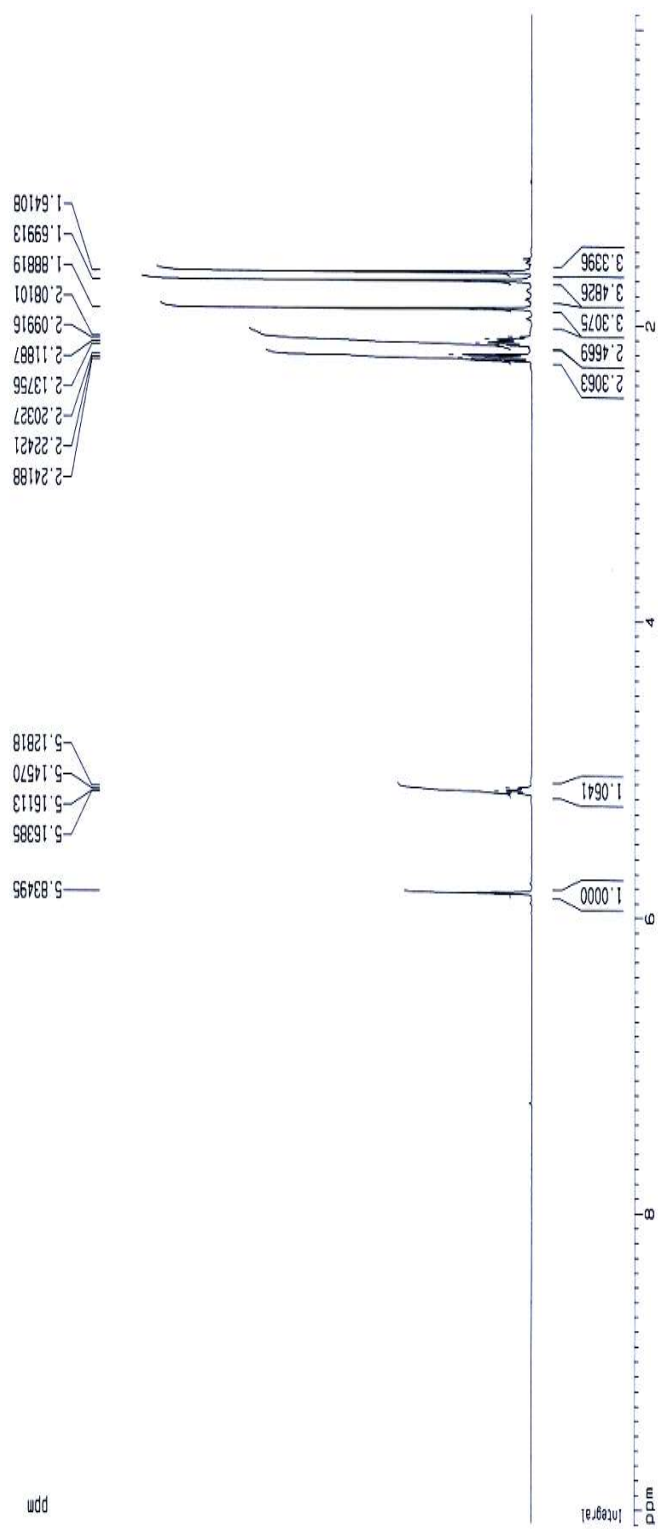

Highly Regio- and Stereoselective Synthesis of Z-Trisubstituted Alkenes via Propyne Bromoboration and Tandem Pd-Catalyzed Cross-Coupling

Chao Wang, Tomas Tobrman, Zhaoqing Xu, and Ei-ichi Negishi\*

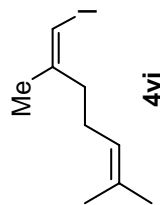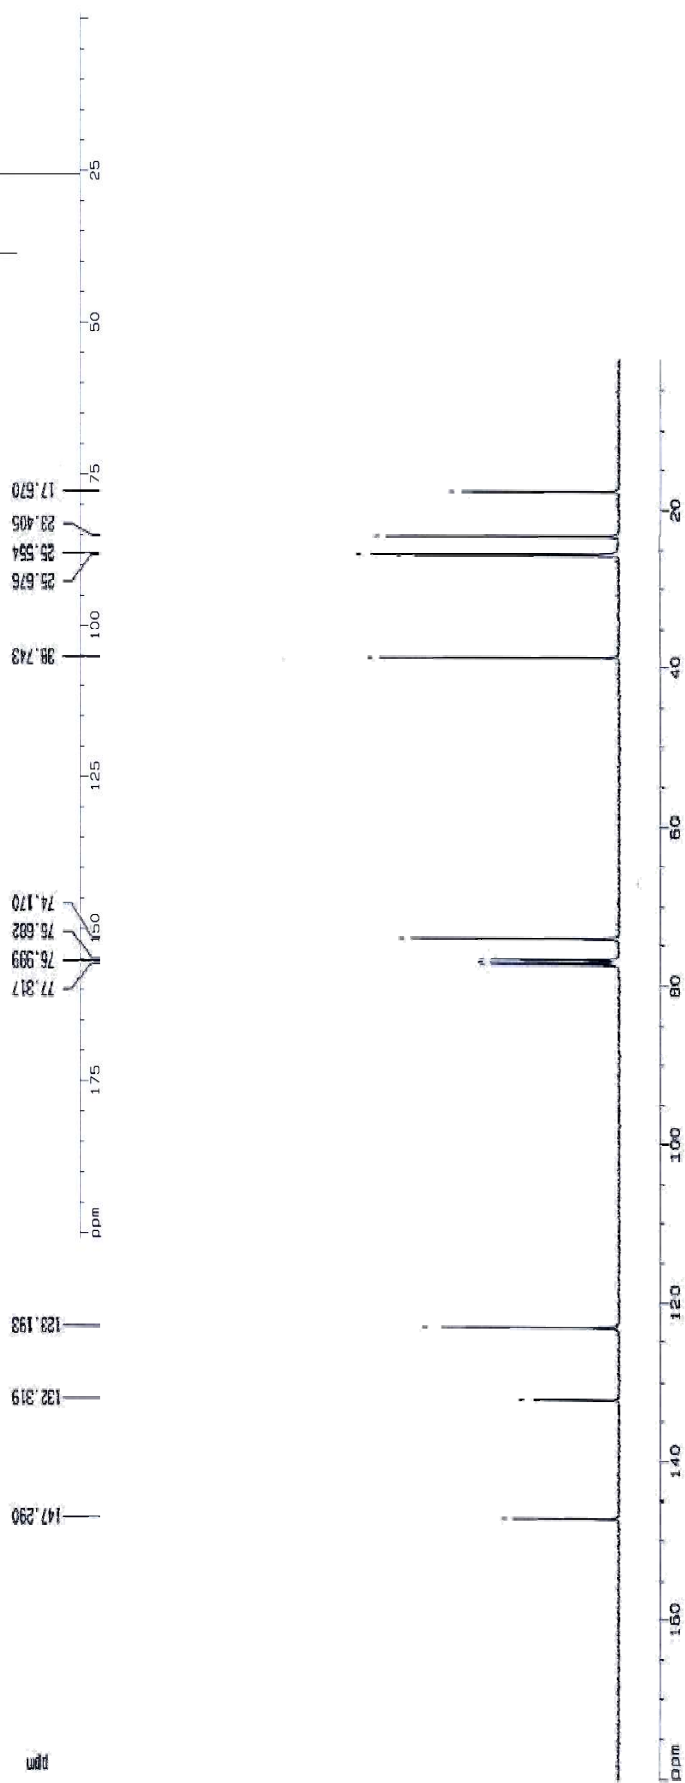

Chao Wang, Tomas Tobrman, Zhaoqing Xu, and Ei-ichi Negishi\*

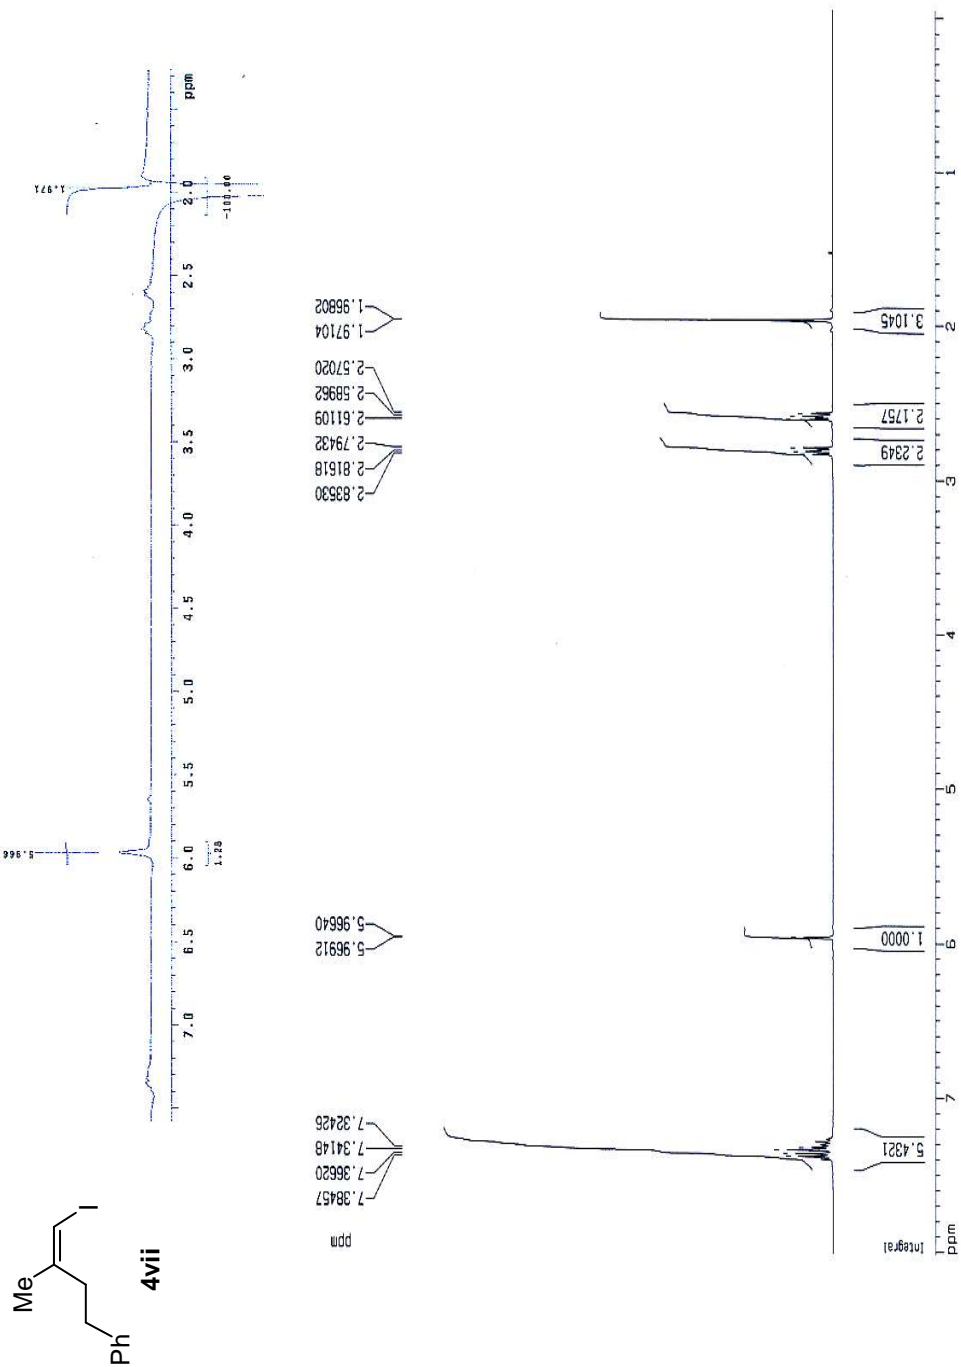

# Highly Regio- and Stereoselective Synthesis of Z-Trisubstituted Alkenes via Propyne Bromoboration and Tandem Pd-Catalyzed Cross-Coupling

Chao Wang, Tomas Tobrman, Zhaoqing Xu, and Ei-ichi Negishi\*

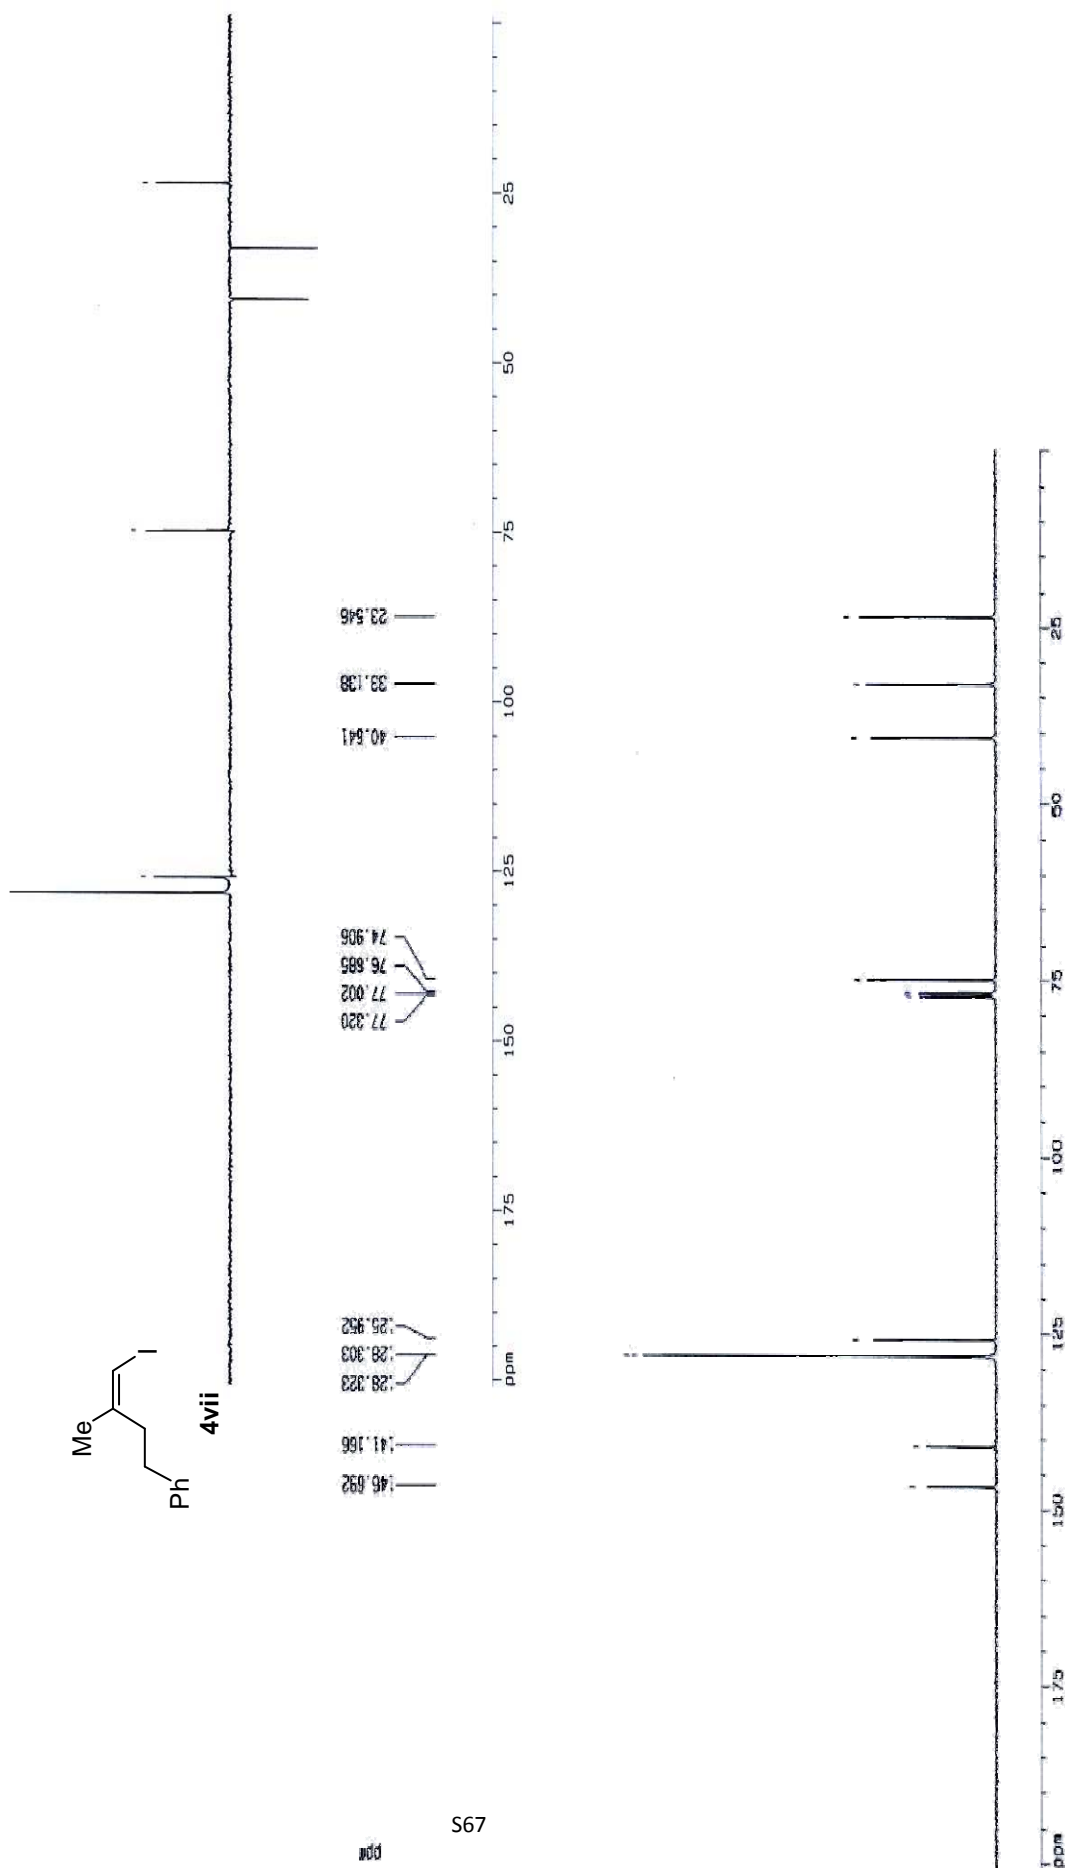

Chao Wang, Tomas Tobrman, Zhaoqing Xu, and Ei-ichi Negishi\*

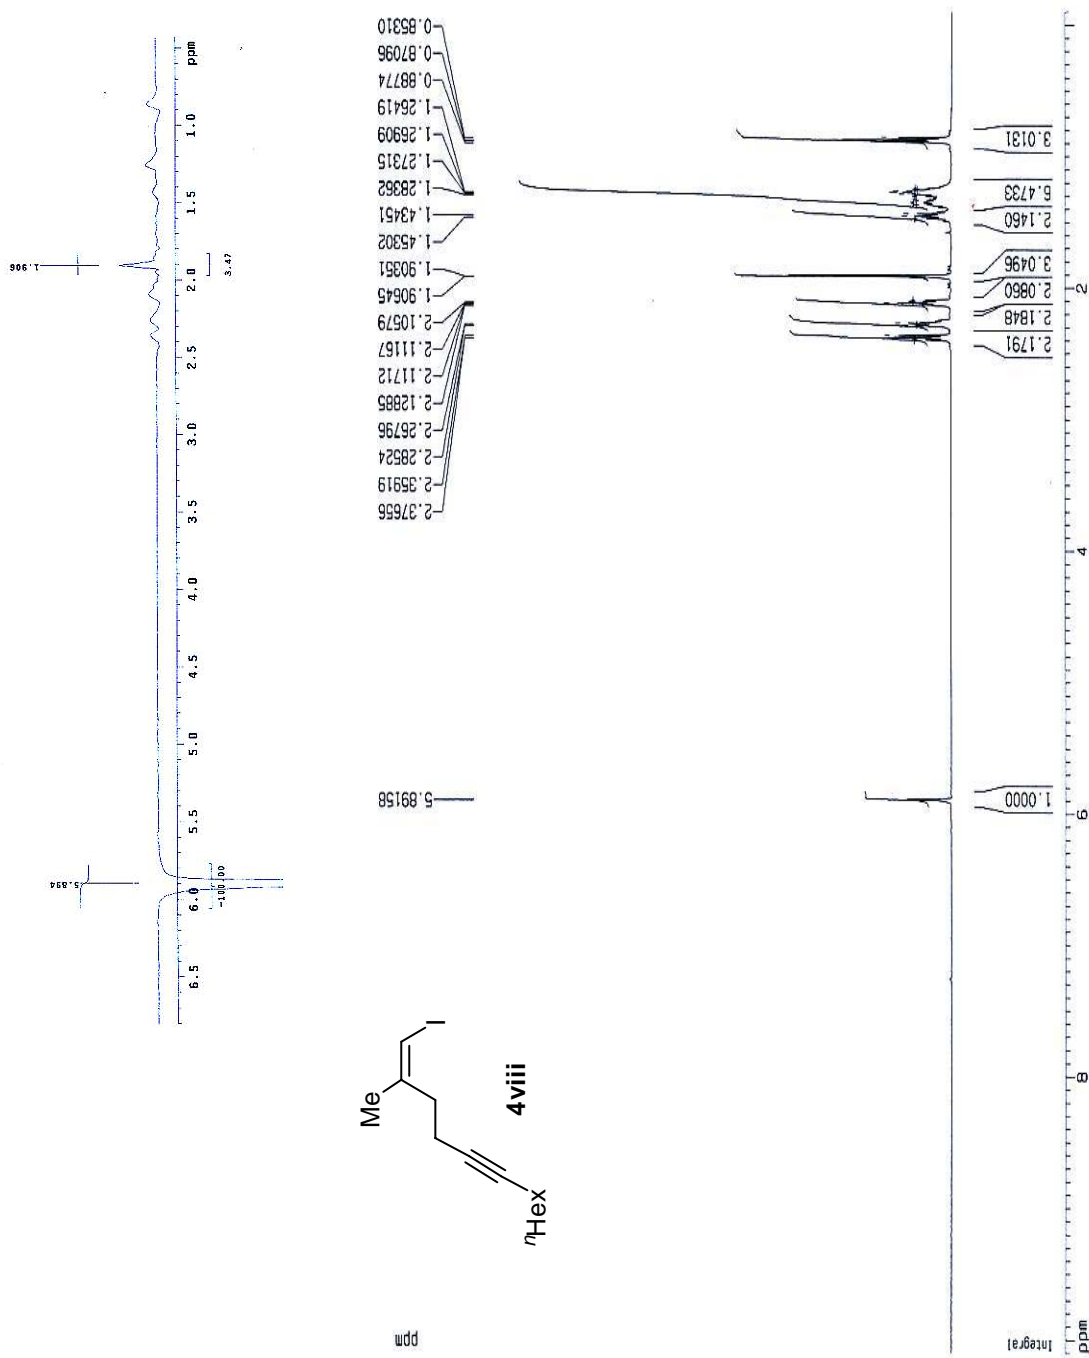



Highly Regio- and Stereoselective Synthesis of Z-Trisubstituted Alkenes via Propyne Bromoboration and Tandem Pd-Catalyzed Cross-Coupling

Chao Wang, Tomas Tobrman, Zhaoqing Xu, and Ei-ichi Negishi\*

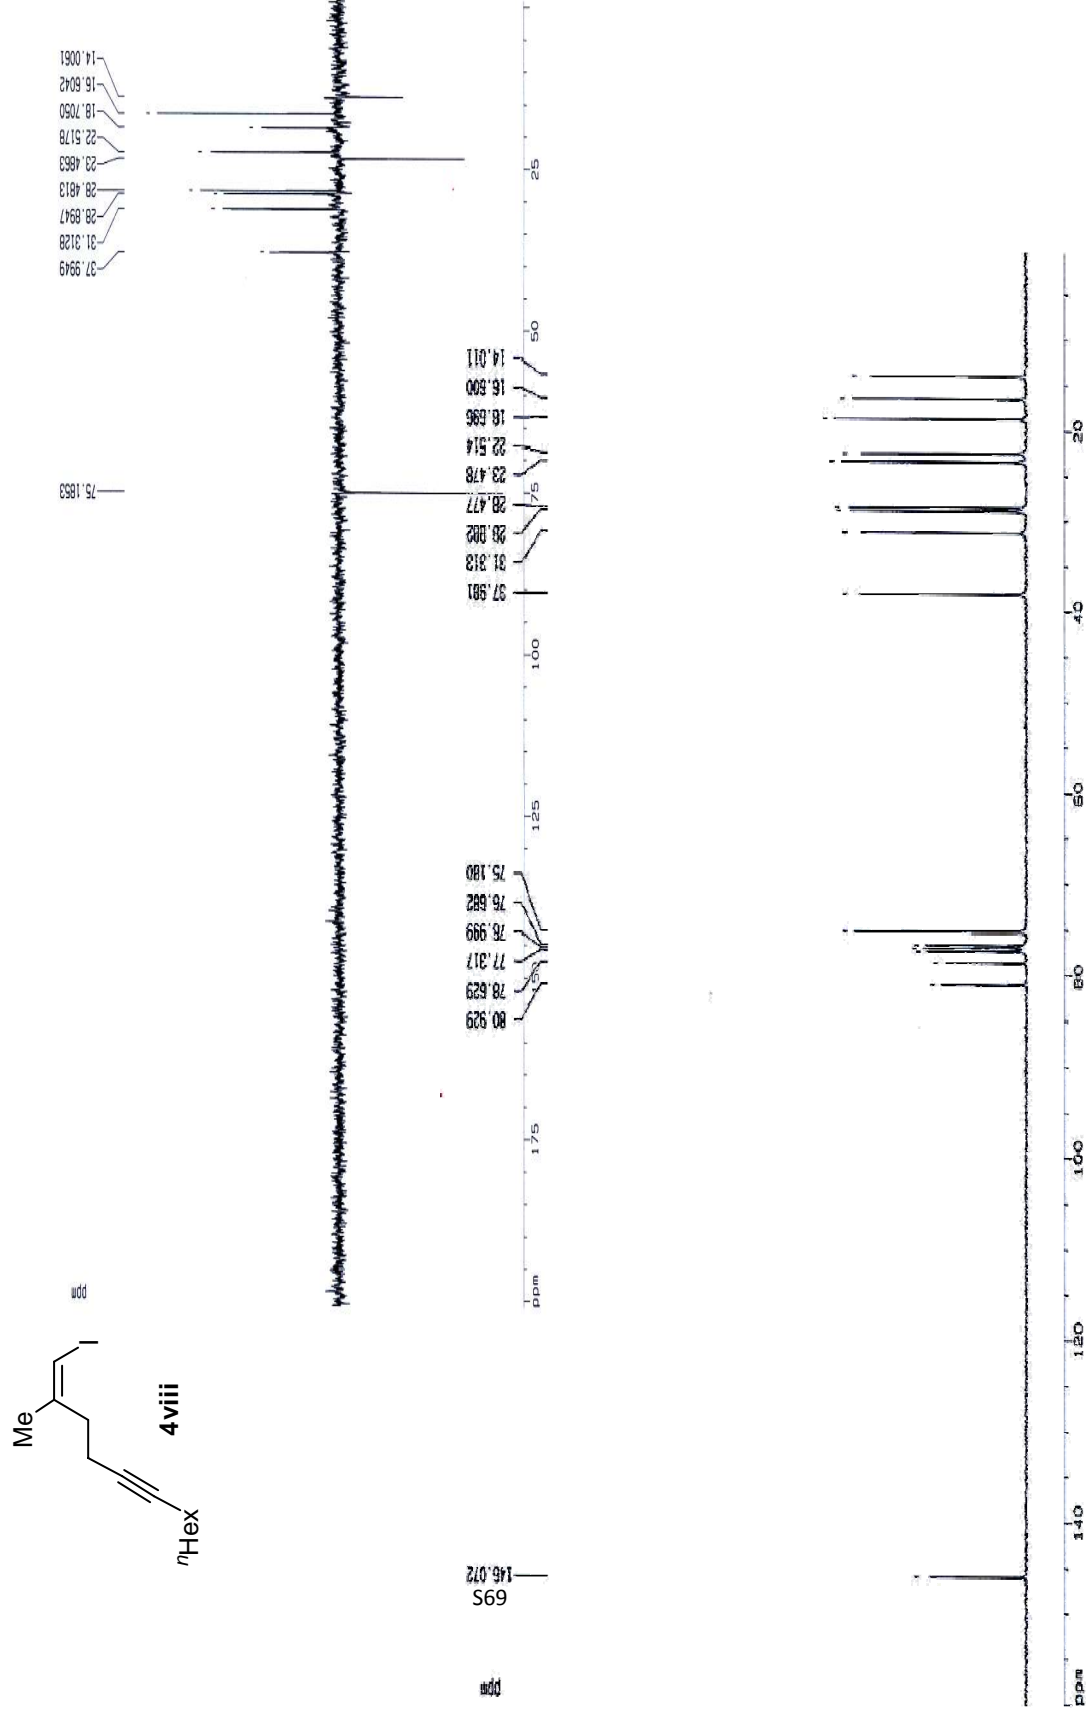



Chao Wang, Tomas Tobrman, Zhaoqing Xu, and Ei-ichi Negishi\*

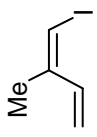

4ix

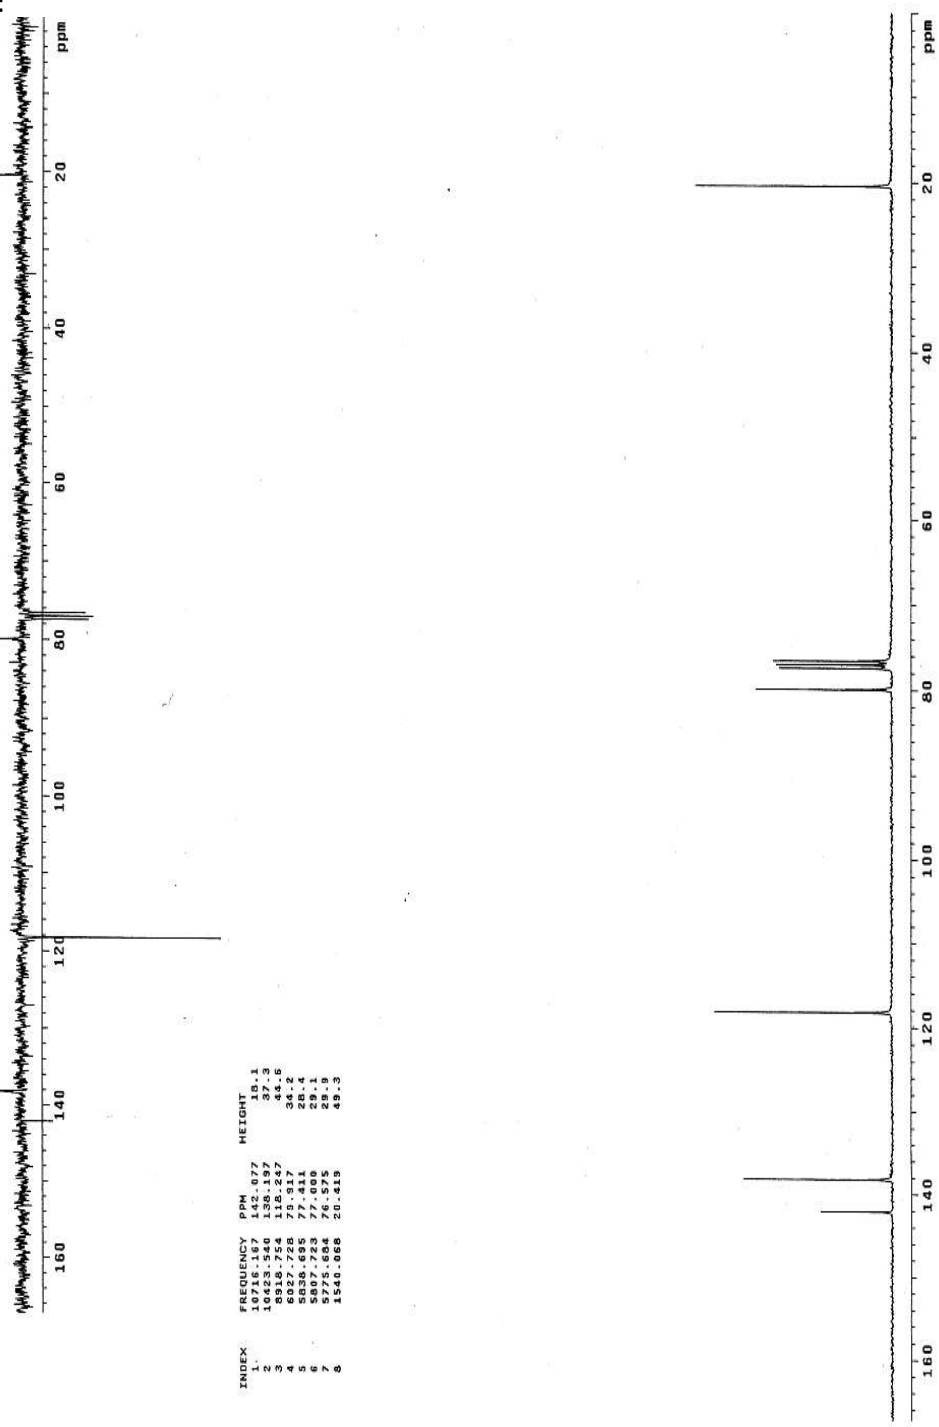

Chao Wang, Tomas Tobrman, Zhaoqing Xu, and Ei-ichi Negishi\*

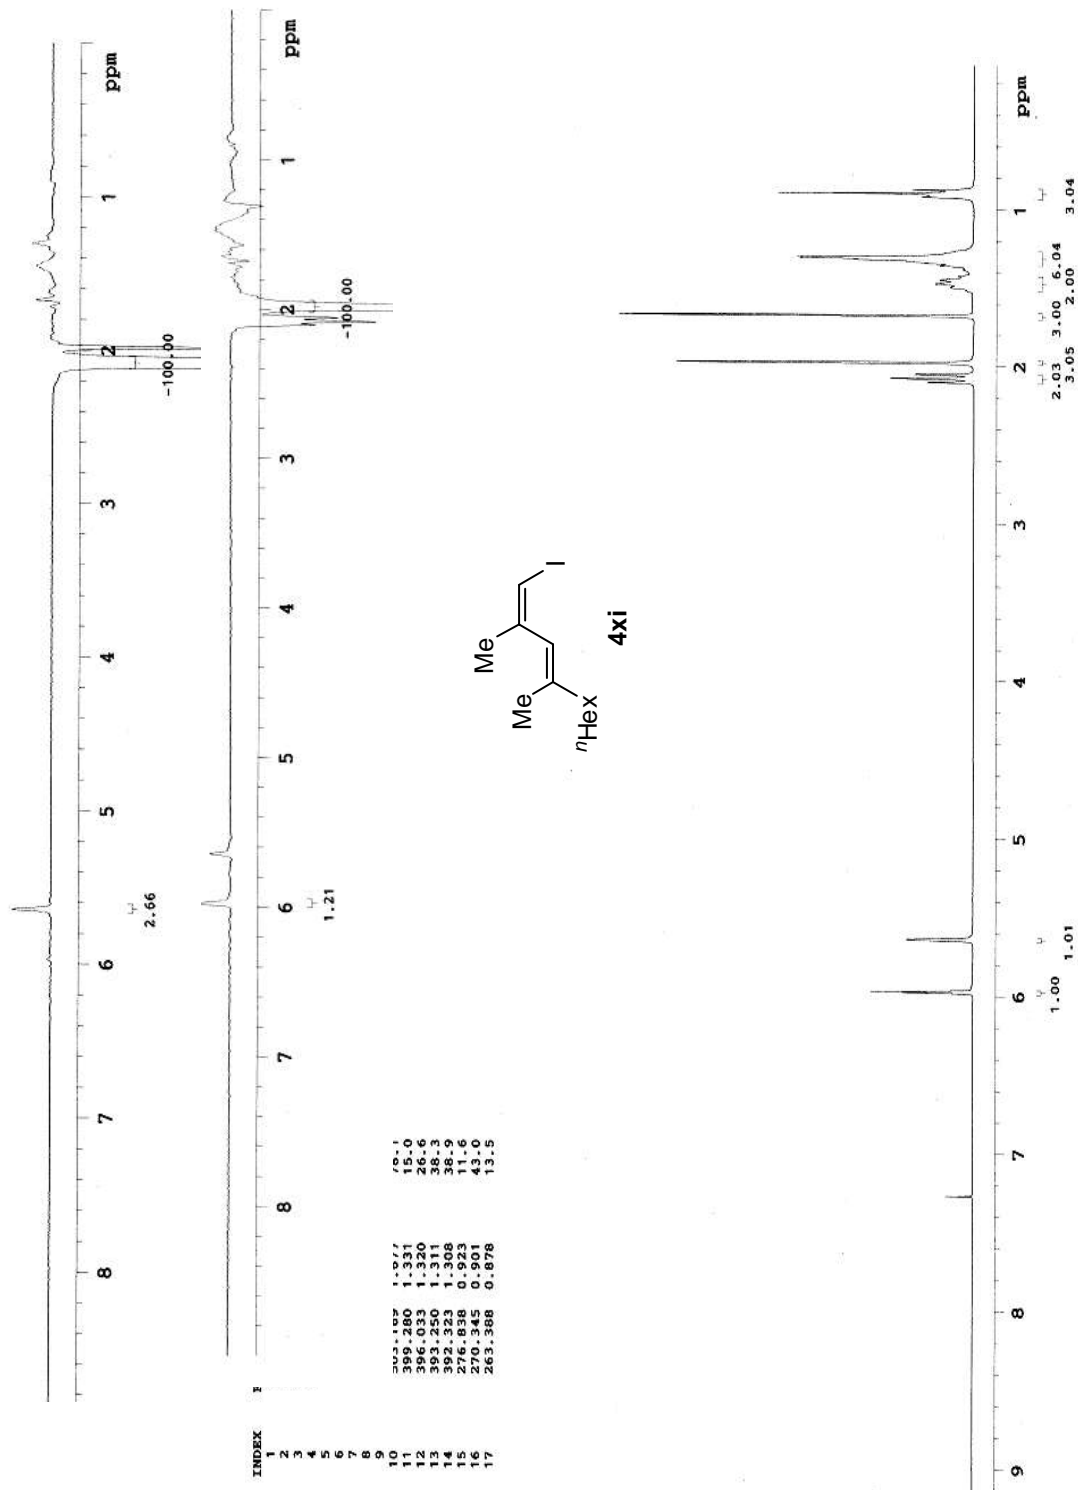

Chao Wang, Tomas Tobrman, Zhaoqing Xu, and Ei-ichi Negishi\*

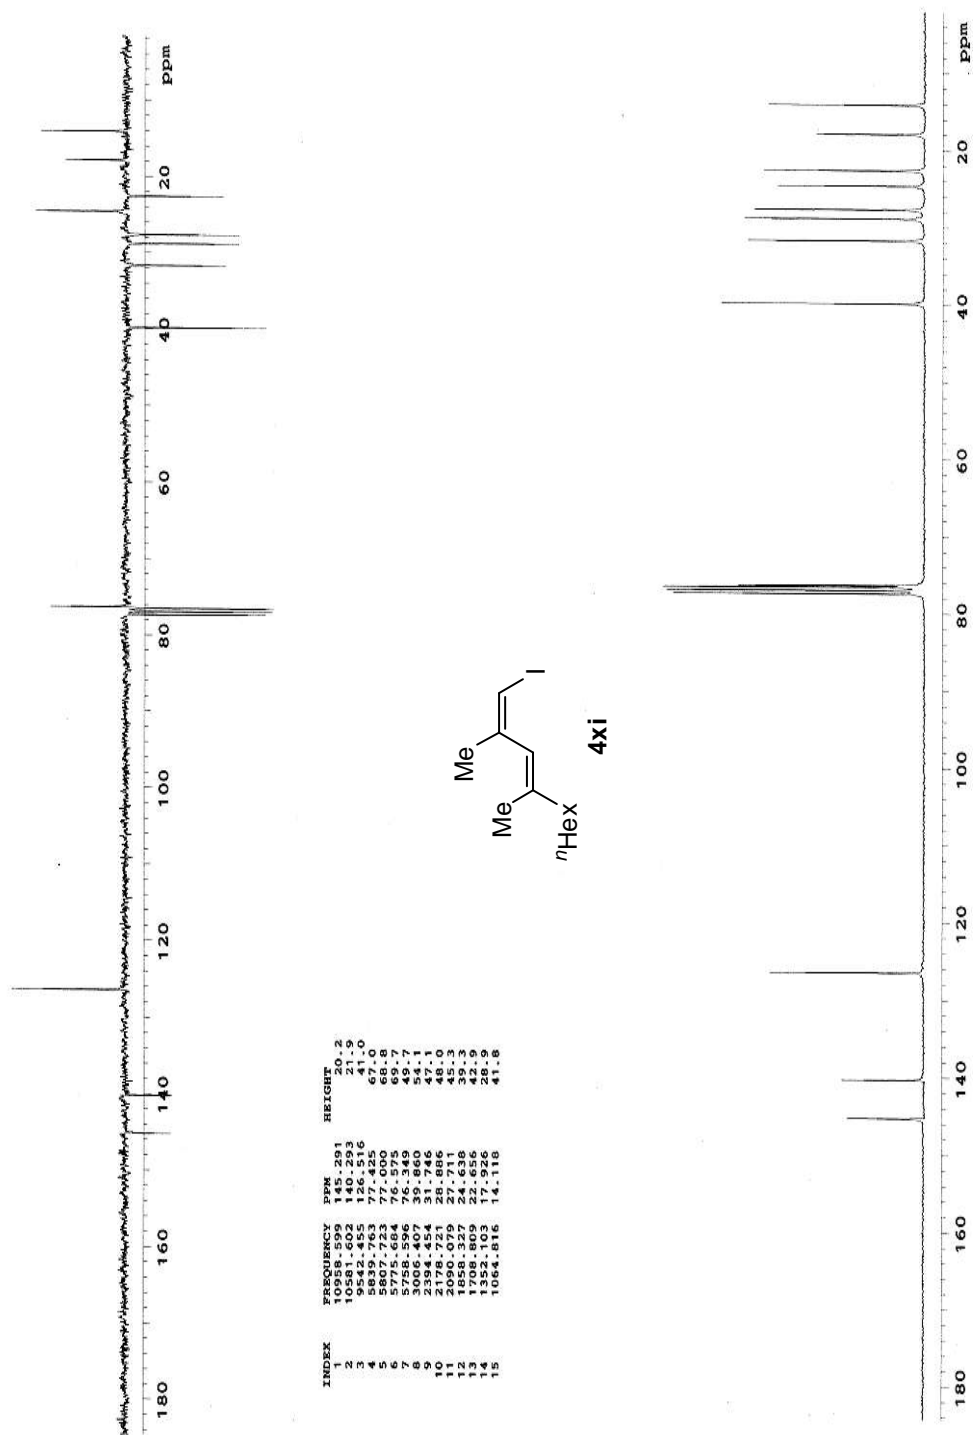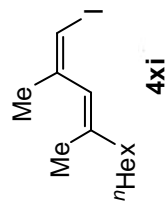

Chao Wang, Tomas Tobrman, Zhaoqing Xu, and Ei-ichi Negishi\*

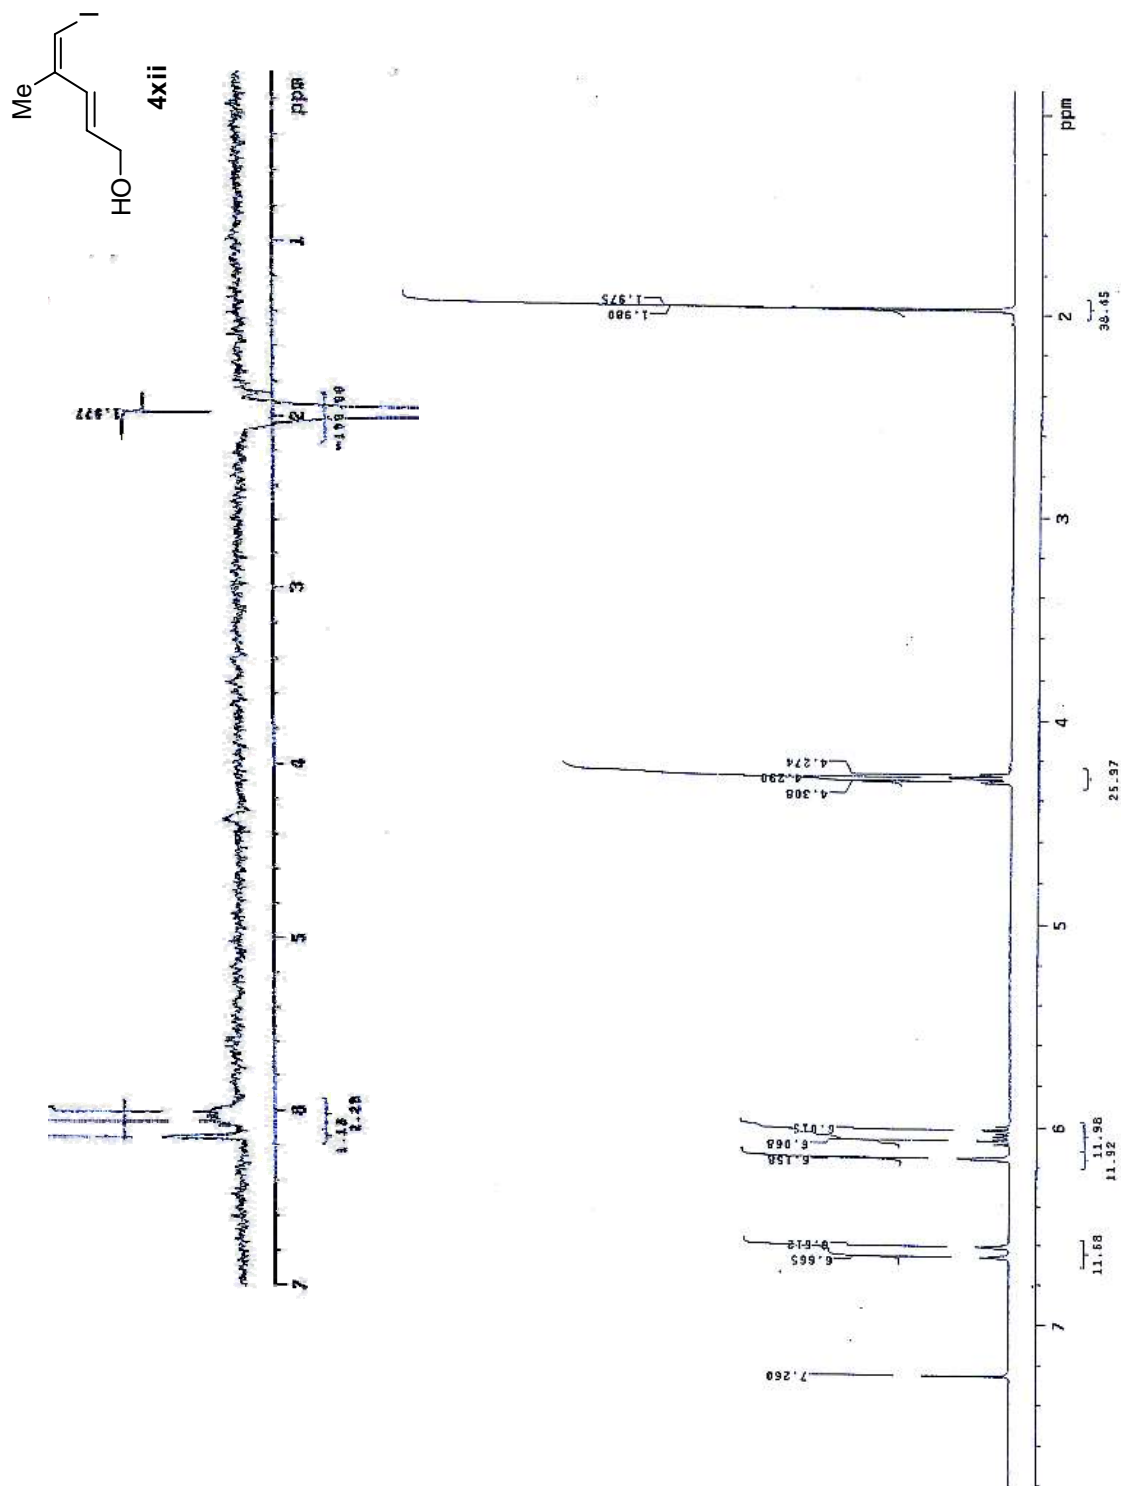

Highly Regio- and Stereoselective Synthesis of Z-Trisubstituted Alkenes via Propyne Bromoboration and Tandem Pd-Catalyzed Cross-Coupling

Chao Wang, Tomas Tobrman, Zhaoqing Xu, and Ei-ichi Negishi\*

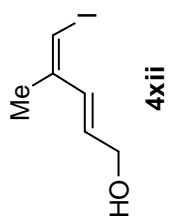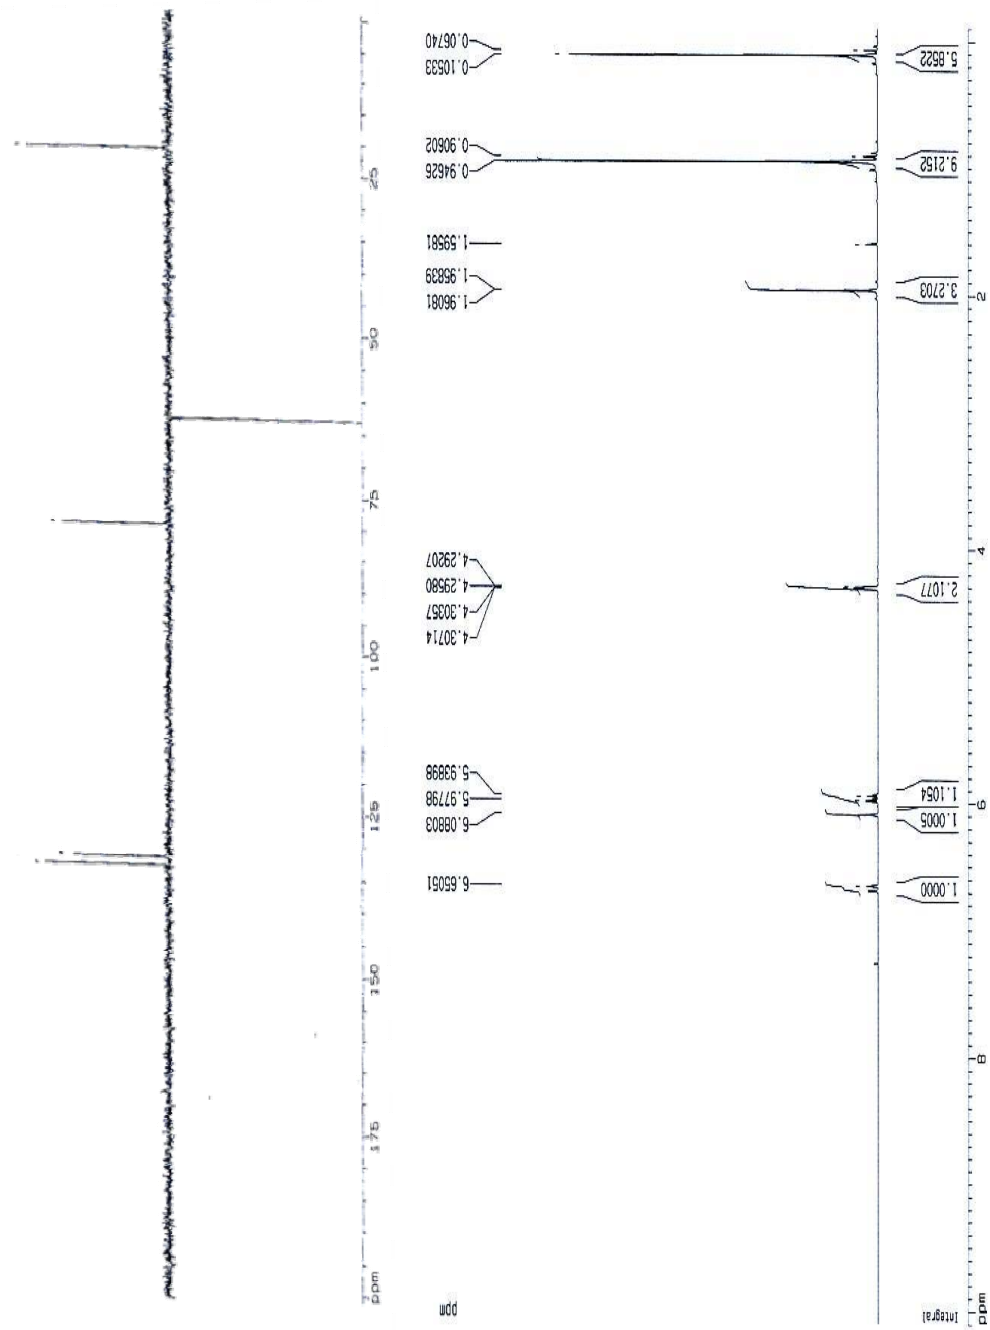







Chao Wang, Tomas Tobrman, Zhaoqing Xu, and Ei-ichi Negishi\*

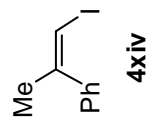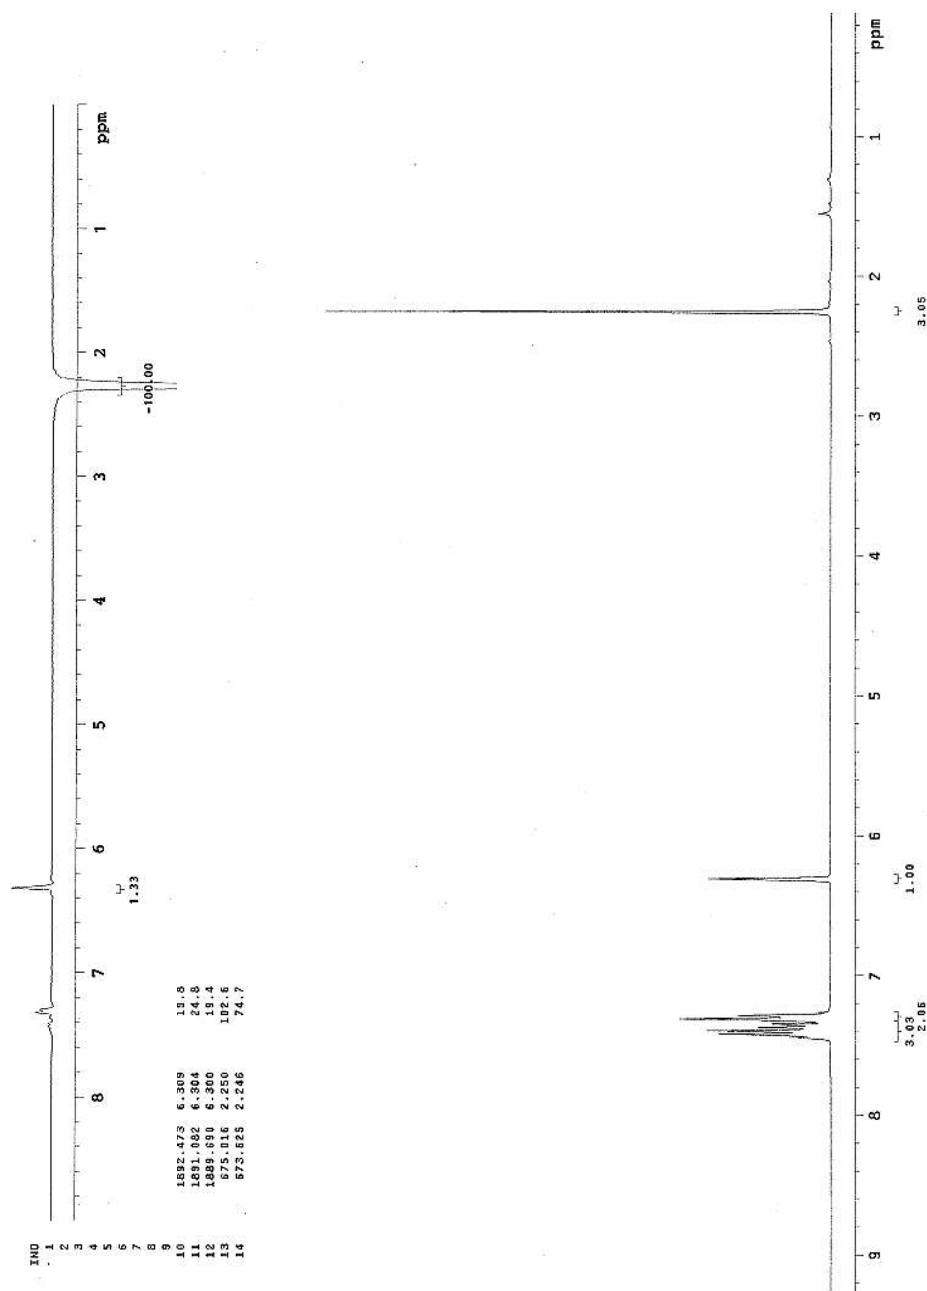

Chao Wang, Tomas Tobrman, Zhaoqing Xu, and Ei-ichi Negishi\*

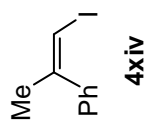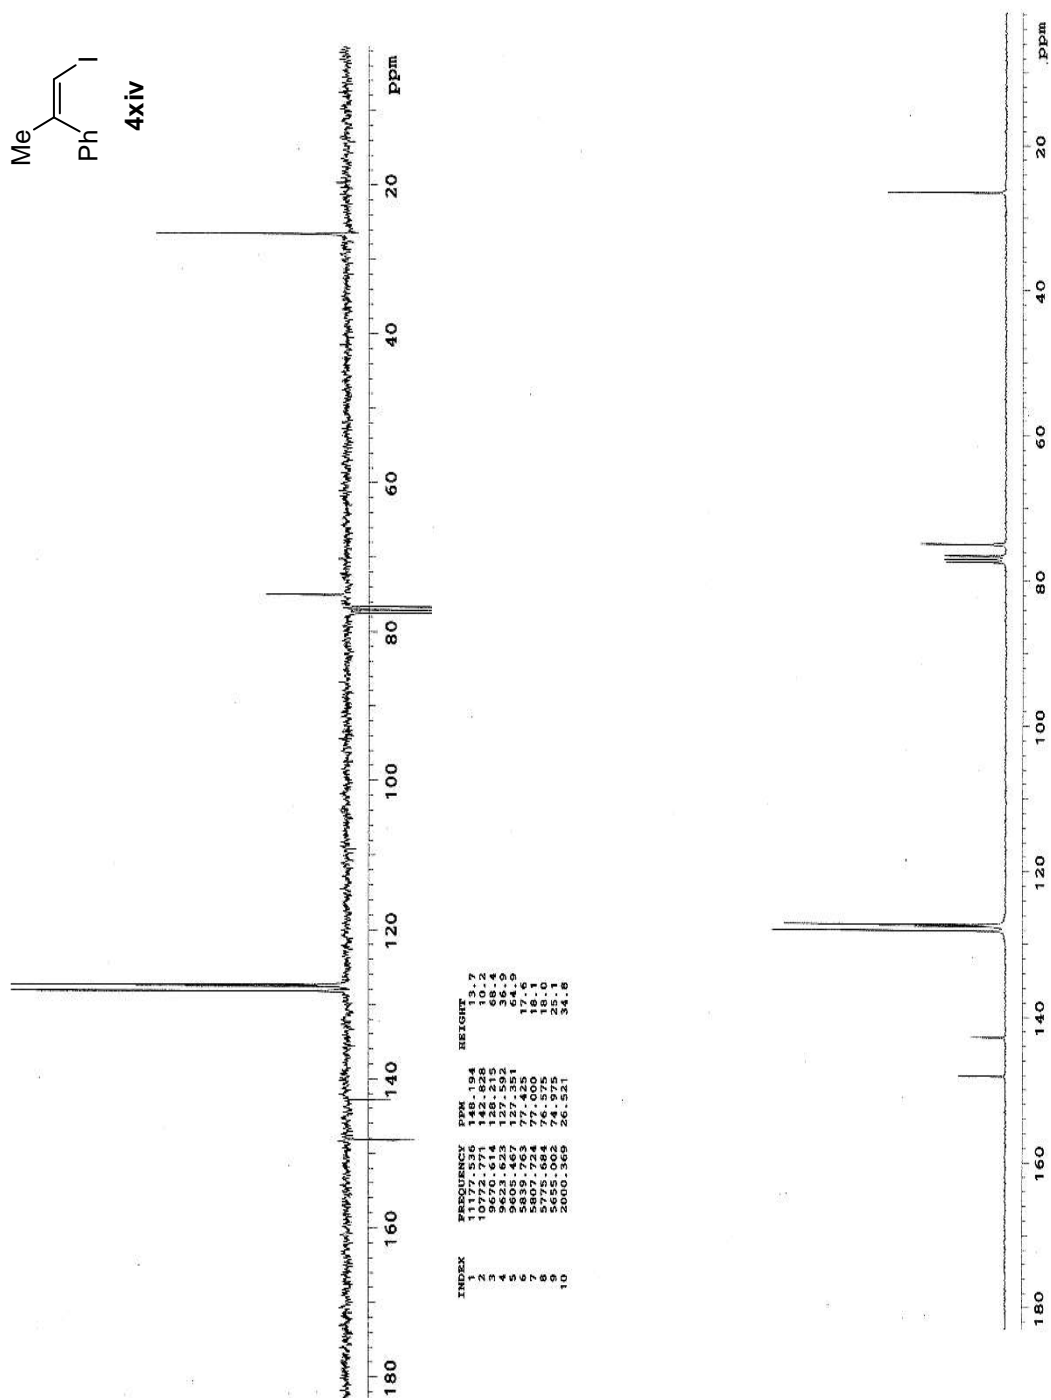

Chao Wang, Tomas Tobrman, Zhaoqing Xu, and Ei-ichi Negishi\*

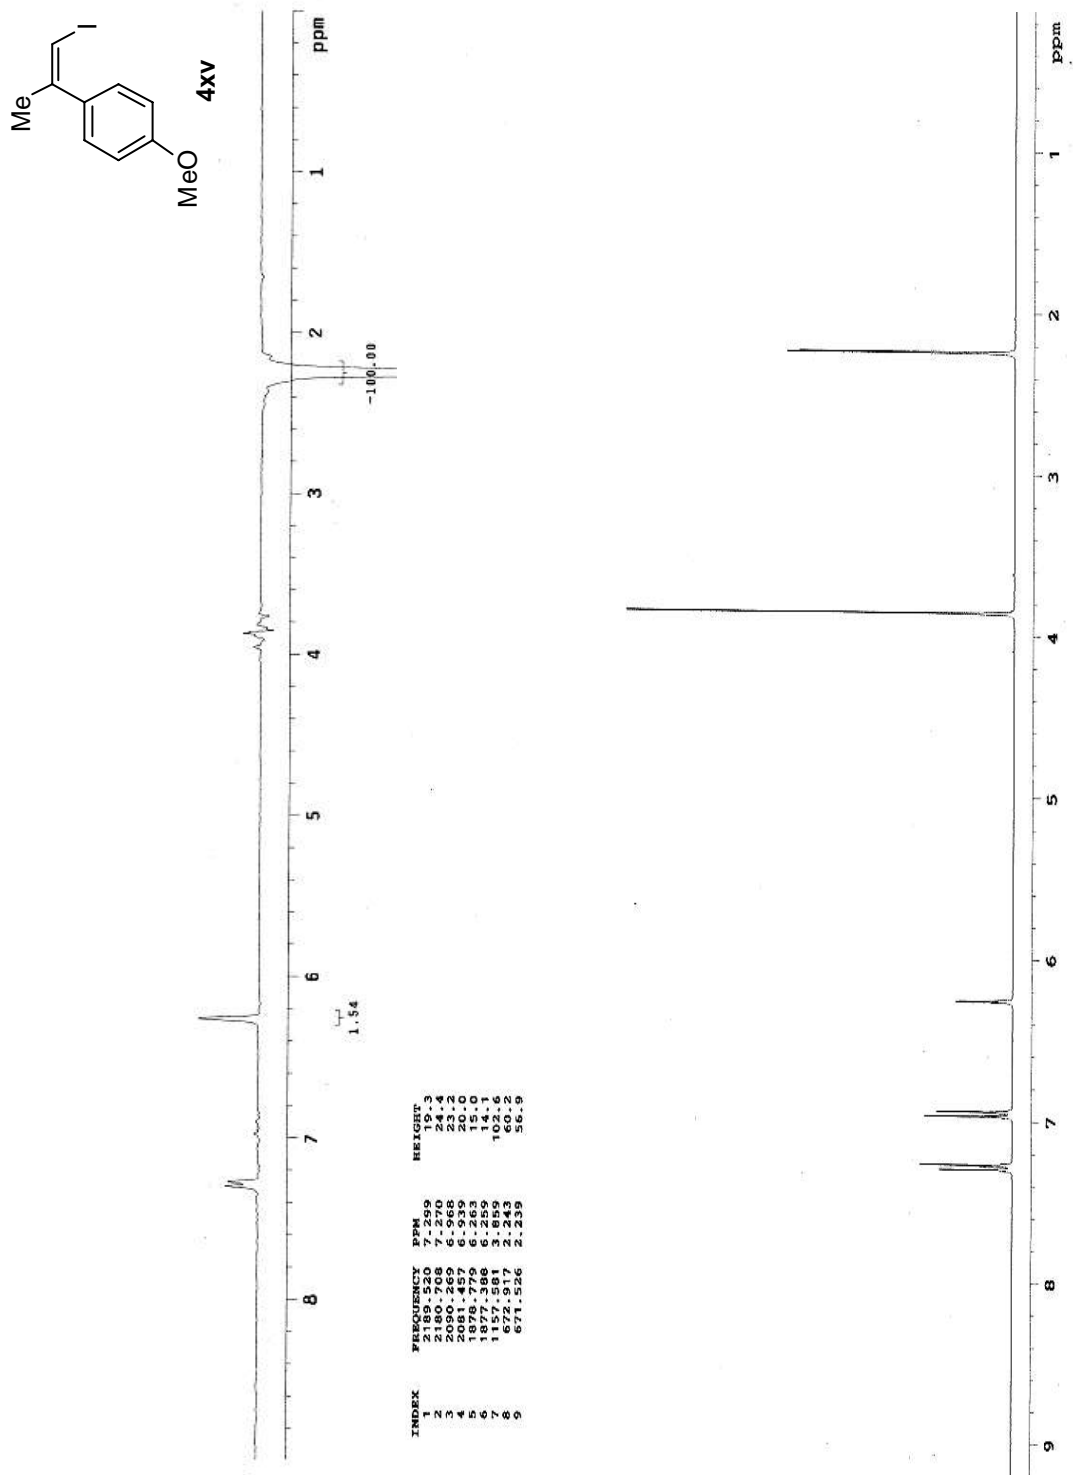

Highly Regio- and Stereoselective Synthesis of Z-Trisubstituted Alkenes via Propyne Bromoboration and Tandem Pd-Catalyzed Cross-Coupling

Chao Wang, Tomas Tobrman, Zhaoqing Xu, and Ei-ichi Negishi\*

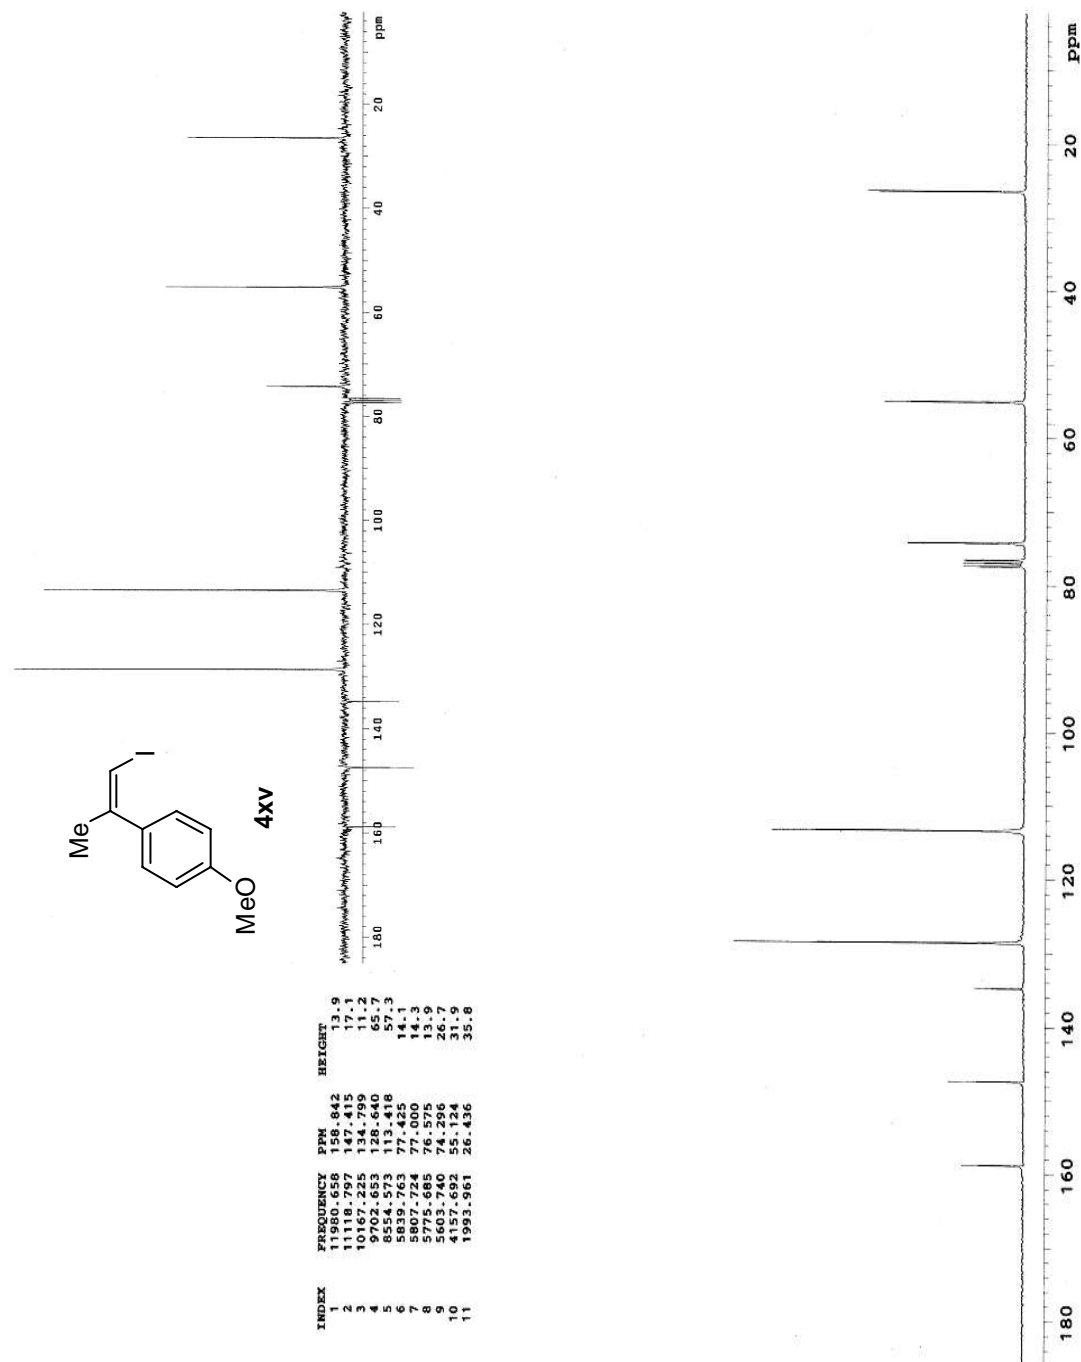

Highly Regio- and Stereoselective Synthesis of Z-Trisubstituted Alkenes via Propyne Bromoboration and Tandem Pd-Catalyzed Cross-Coupling

Chao Wang, Tomas Tobrman, Zhaoqing Xu, and Ei-ichi Negishi\*

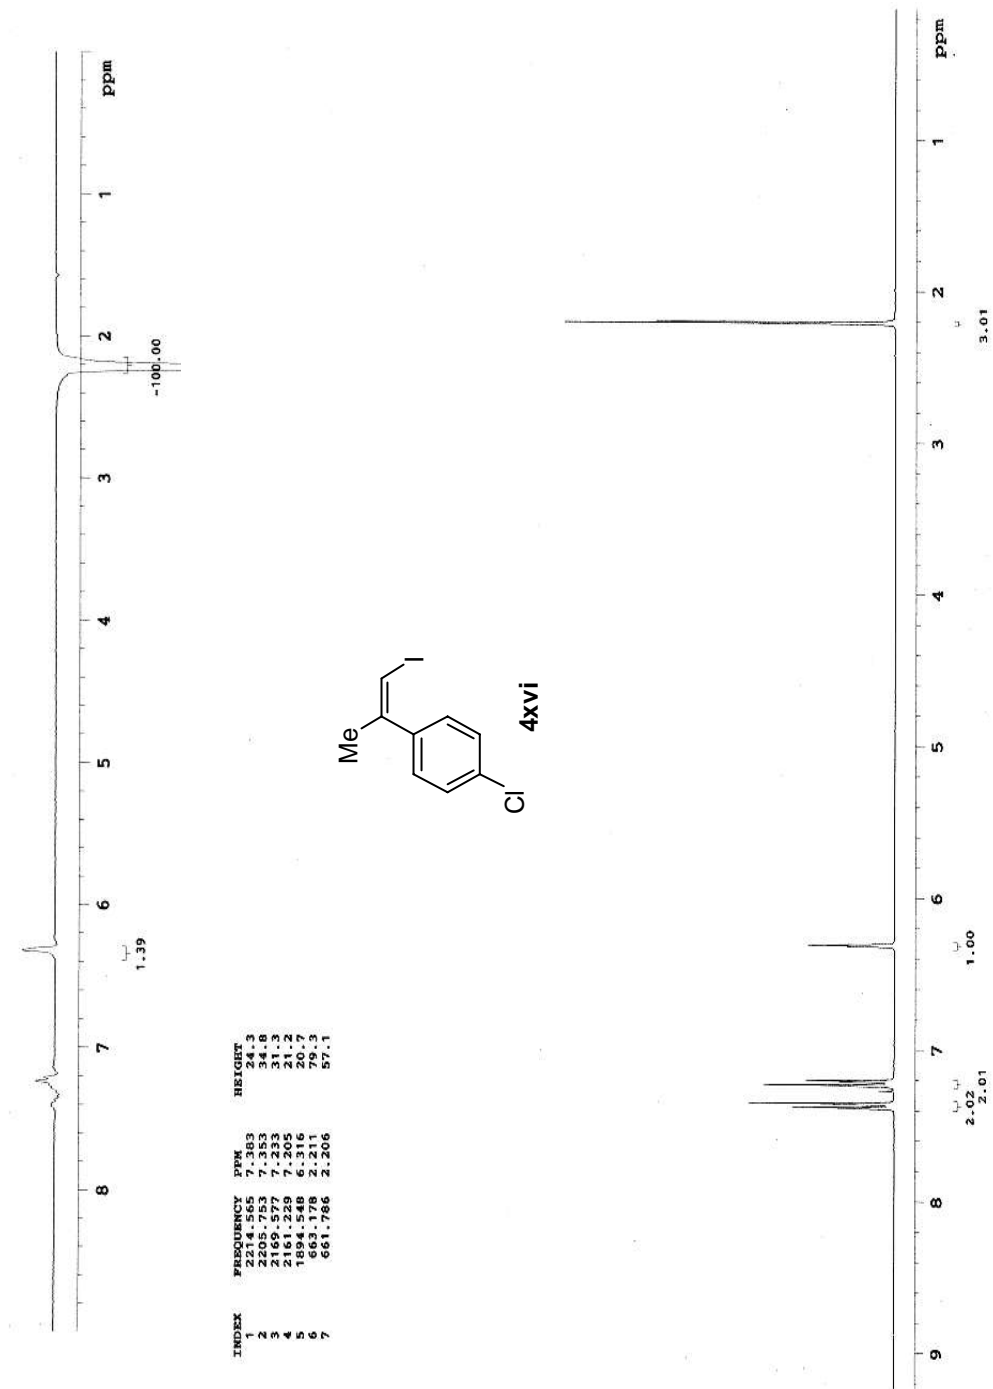

Chao Wang, Tomas Tobrman, Zhaoqing Xu, and Ei-ichi Negishi\*

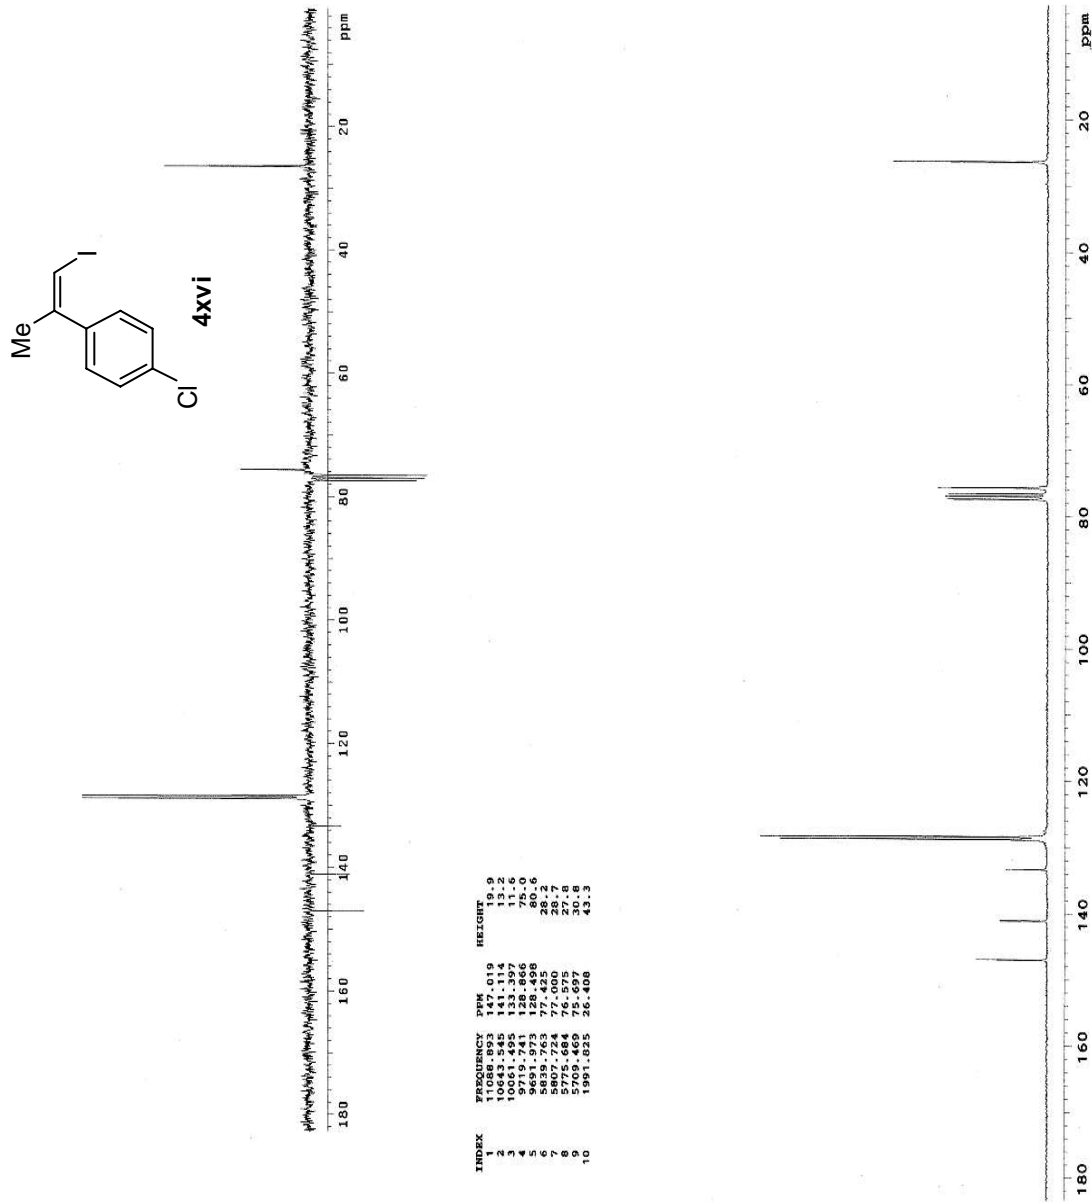

Chao Wang, Tomas Tobrman, Zhaoqing Xu, and Ei-ichi Negishi\*

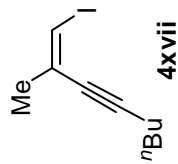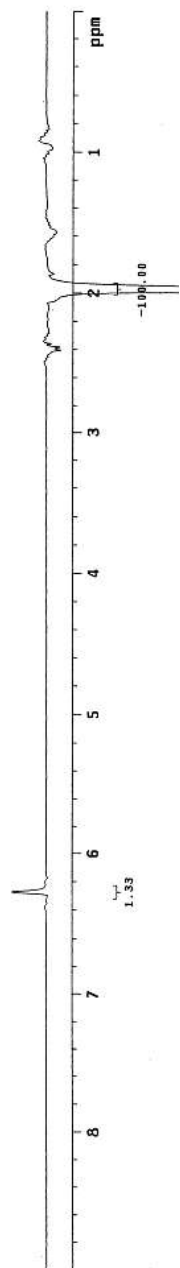

| INDEX | FREQUENCY | PPM   | HEIGHT |
|-------|-----------|-------|--------|
| 1     | 1863.061  | 6.280 | 12.0   |
| 2     | 1862.480  | 6.276 | 13.7   |
| 3     | 721.659   | 2.383 | 24.4   |
| 4     | 714.659   | 2.383 | 24.4   |
| 5     | 707.702   | 2.359 | 13.6   |
| 6     | 581.754   | 1.973 | 53.5   |
| 7     | 497.811   | 1.582 | 8.0    |
| 8     | 474.014   | 1.582 | 8.0    |
| 9     | 472.559   | 1.575 | 7.5    |
| 10    | 468.385   | 1.561 | 9.4    |
| 11    | 467.677   | 1.557 | 7.5    |
| 12    | 465.852   | 1.552 | 7.5    |
| 13    | 460.036   | 1.534 | 7.3    |
| 14    | 459.103   | 1.531 | 8.0    |
| 15    | 451.689   | 1.506 | 8.9    |
| 16    | 281.940   | 0.940 | 38.4   |
| 17    | 281.940   | 0.940 | 38.4   |
| 18    | 274.519   | 0.915 | 14.8   |

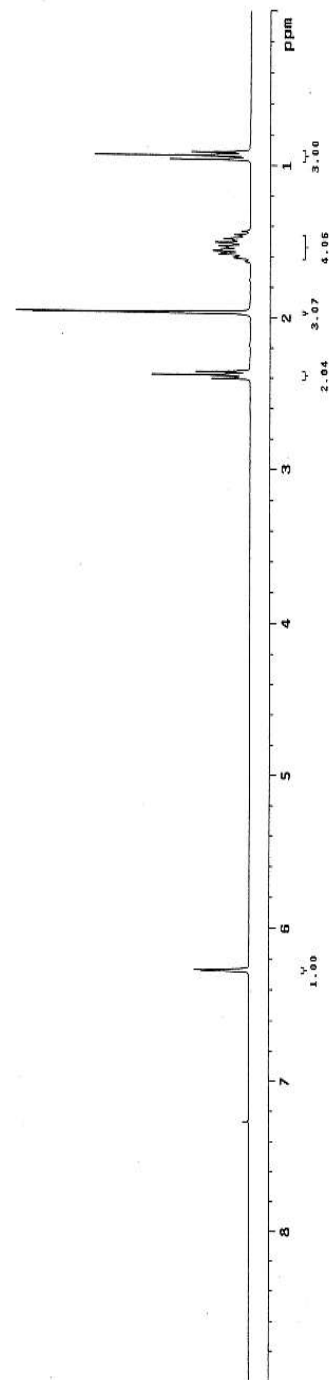



Chao Wang, Tomas Tobrman, Zhaoqing Xu, and Ei-ichi Negishi\*

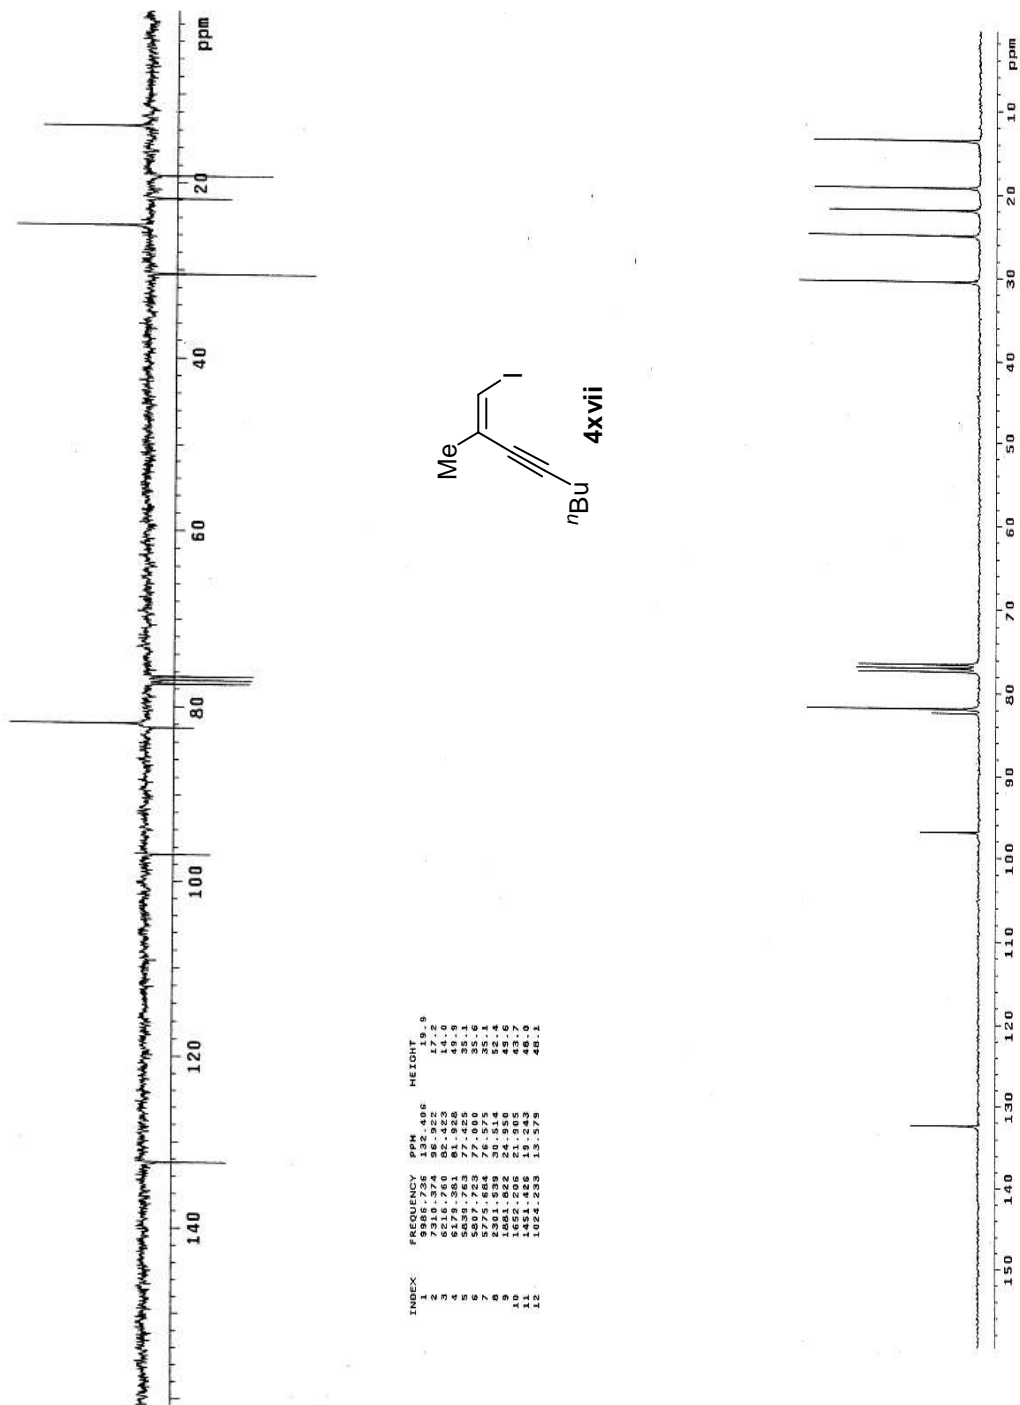

# Highly Regio- and Stereoselective Synthesis of Z-Trisubstituted Alkenes via Propyne Bromoboration and Tandem Pd-Catalyzed Cross-Coupling

Chao Wang, Tomas Tobrman, Zhaoqing Xu, and Ei-ichi Negishi\*

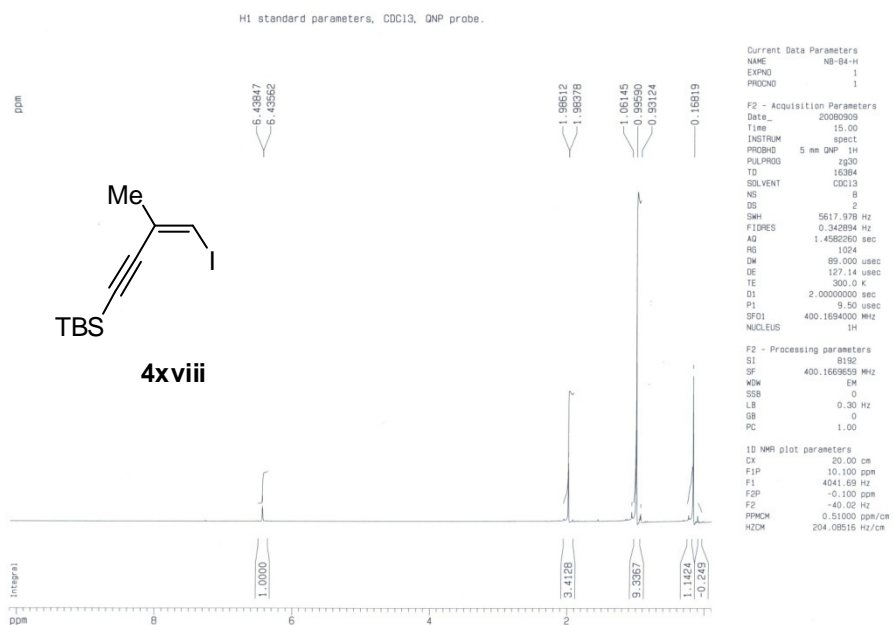

Turn spinning off.

Data Collected on: Inova300-1-Inovahifreq  
 Archive directory: /home/tobrman/vmrsys/data  
 Sample directory:  
 File: cyclenoe

Pulse Sequence: cyclenoe  
 Solvent: CDCl3

Relax. delay 0.100 sec  
 Pulse 188.4 degrees  
 Mixing 0.000 sec  
 Acq. time 2.156 sec  
 Vield 3799.4 Hz  
 64 repetitions

OBSERVE H1, 299.9598928 MHz  
 DATA PROCESSING  
 Line broadening 1.0 Hz  
 FT size 16384  
 Total time 7 min

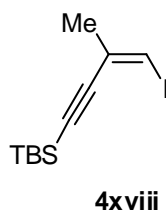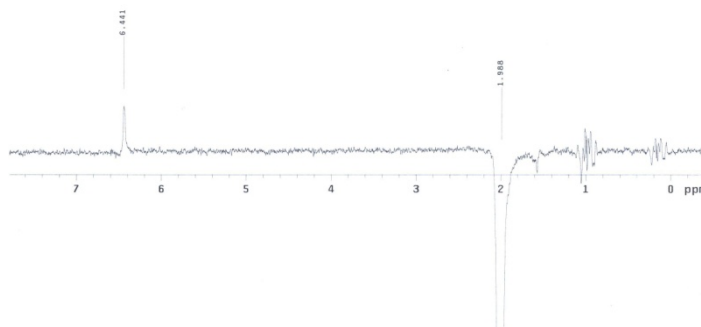

# Highly Regio- and Stereoselective Synthesis of Z-Trisubstituted Alkenes via Propyne Bromoboration and Tandem Pd-Catalyzed Cross-Coupling

Chao Wang, Tomas Tobrman, Zhaoqing Xu, and Ei-ichi Negishi\*

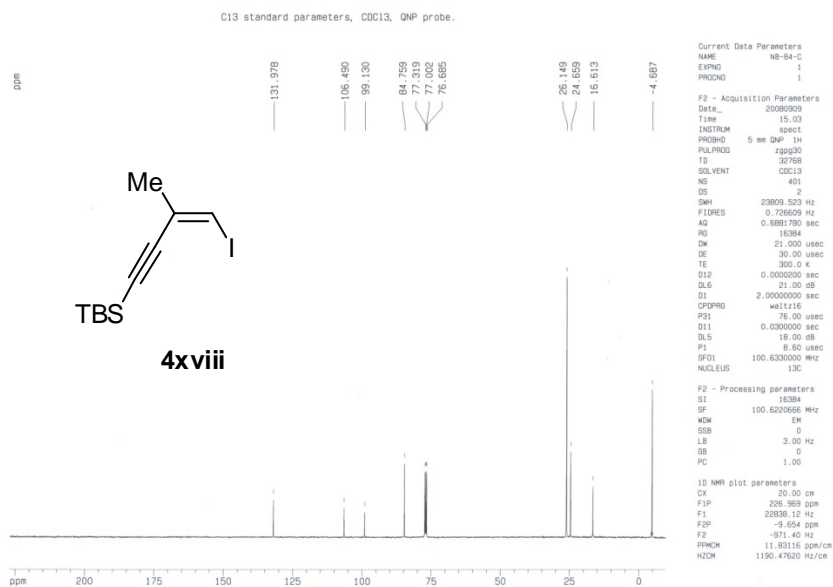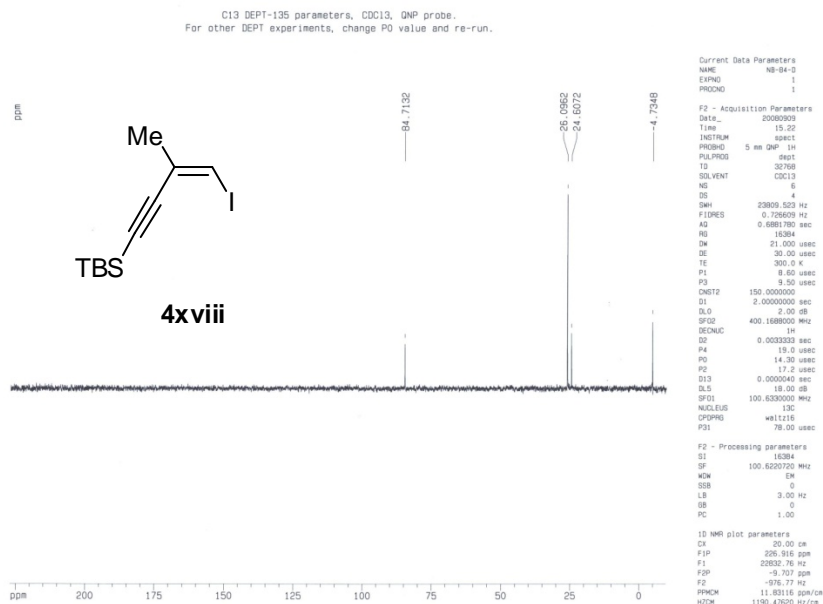

Chao Wang, Tomas Tobrman, Zhaoqing Xu, and Ei-ichi Negishi\*

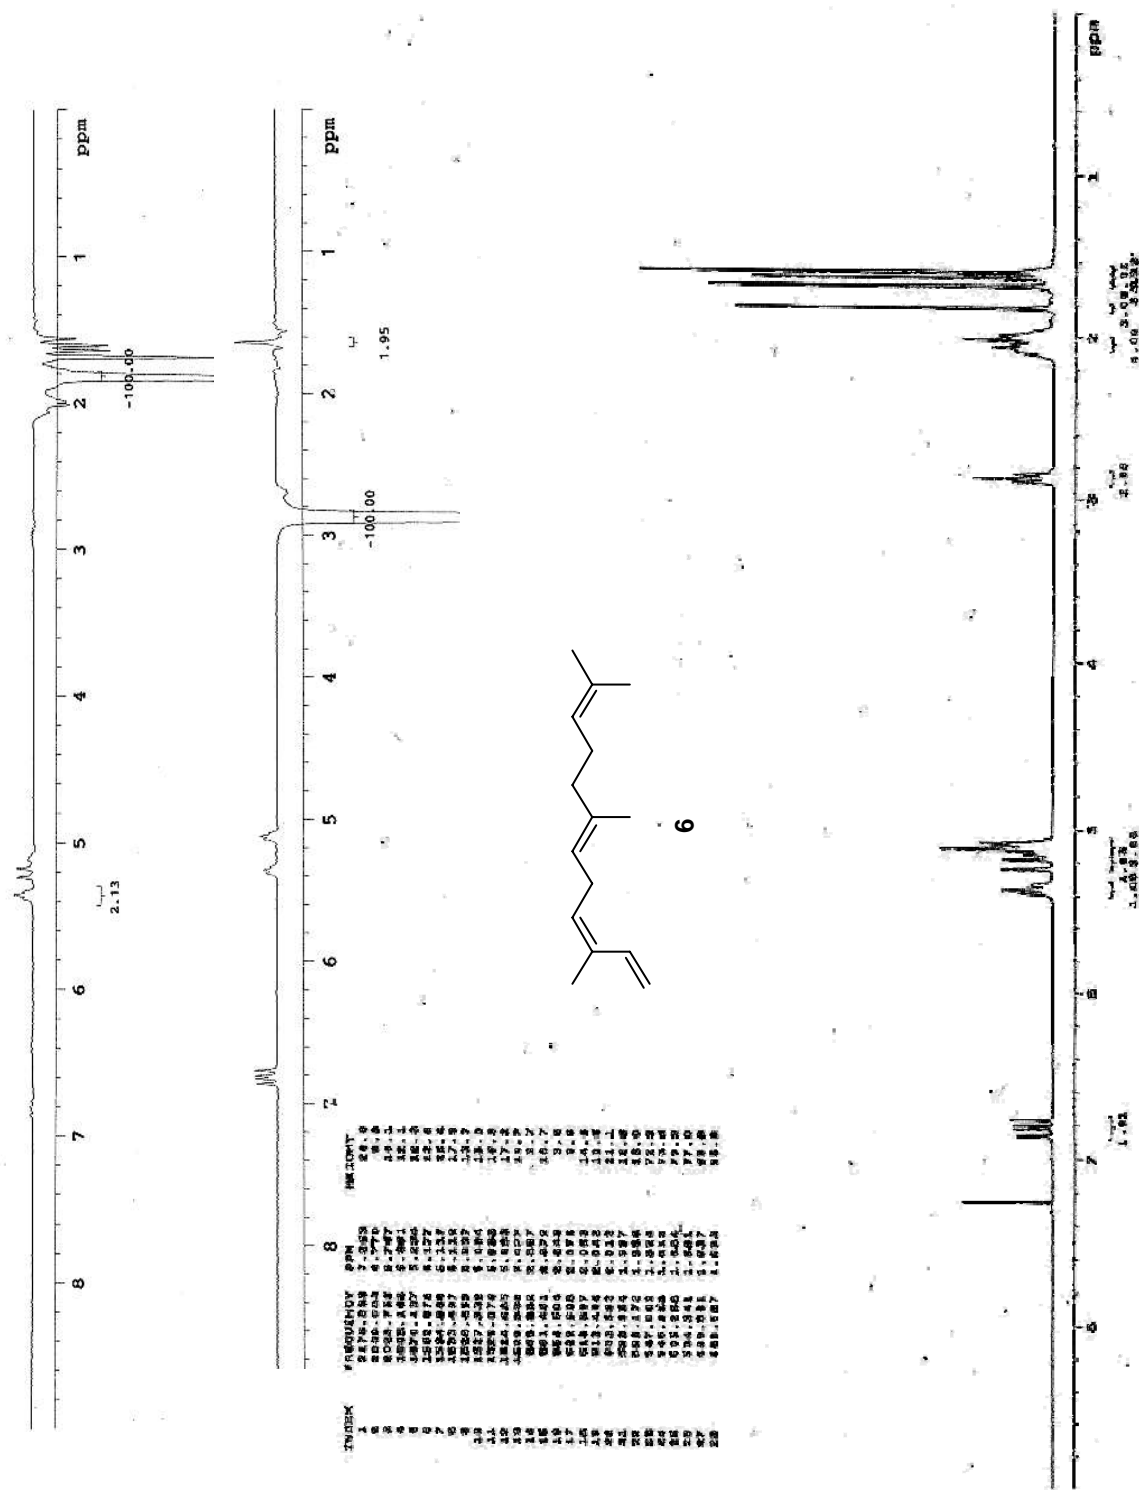

Chao Wang, Tomas Tobrman, Zhaoqing Xu, and Ei-ichi Negishi\*

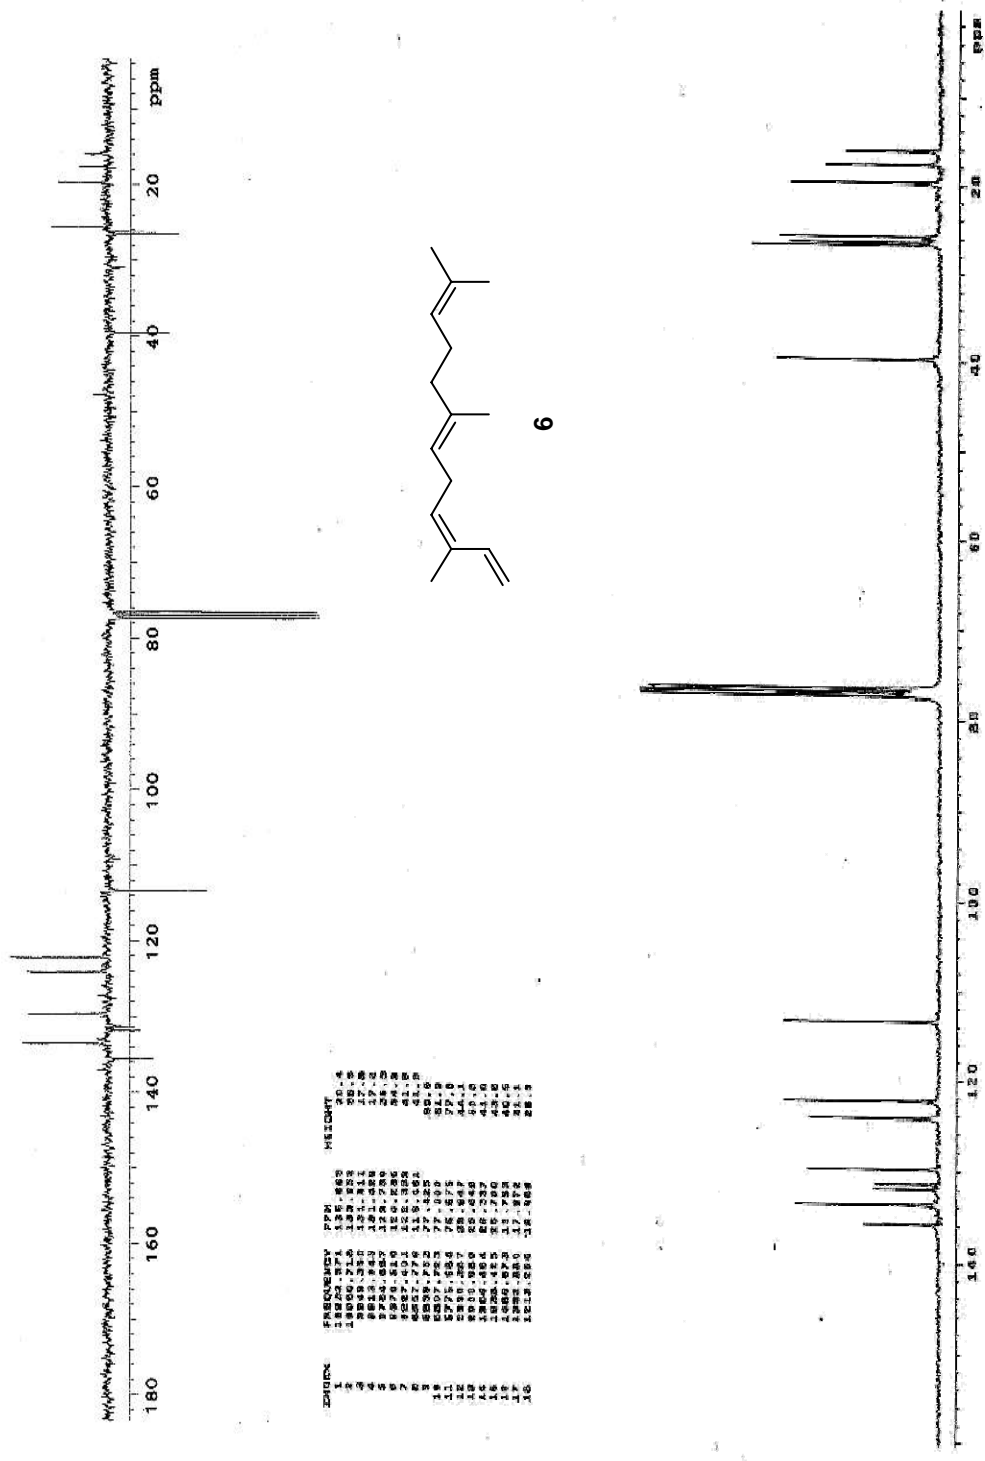

Chao Wang, Tomas Tobrman, Zhaoqing Xu, and Ei-ichi Negishi\*

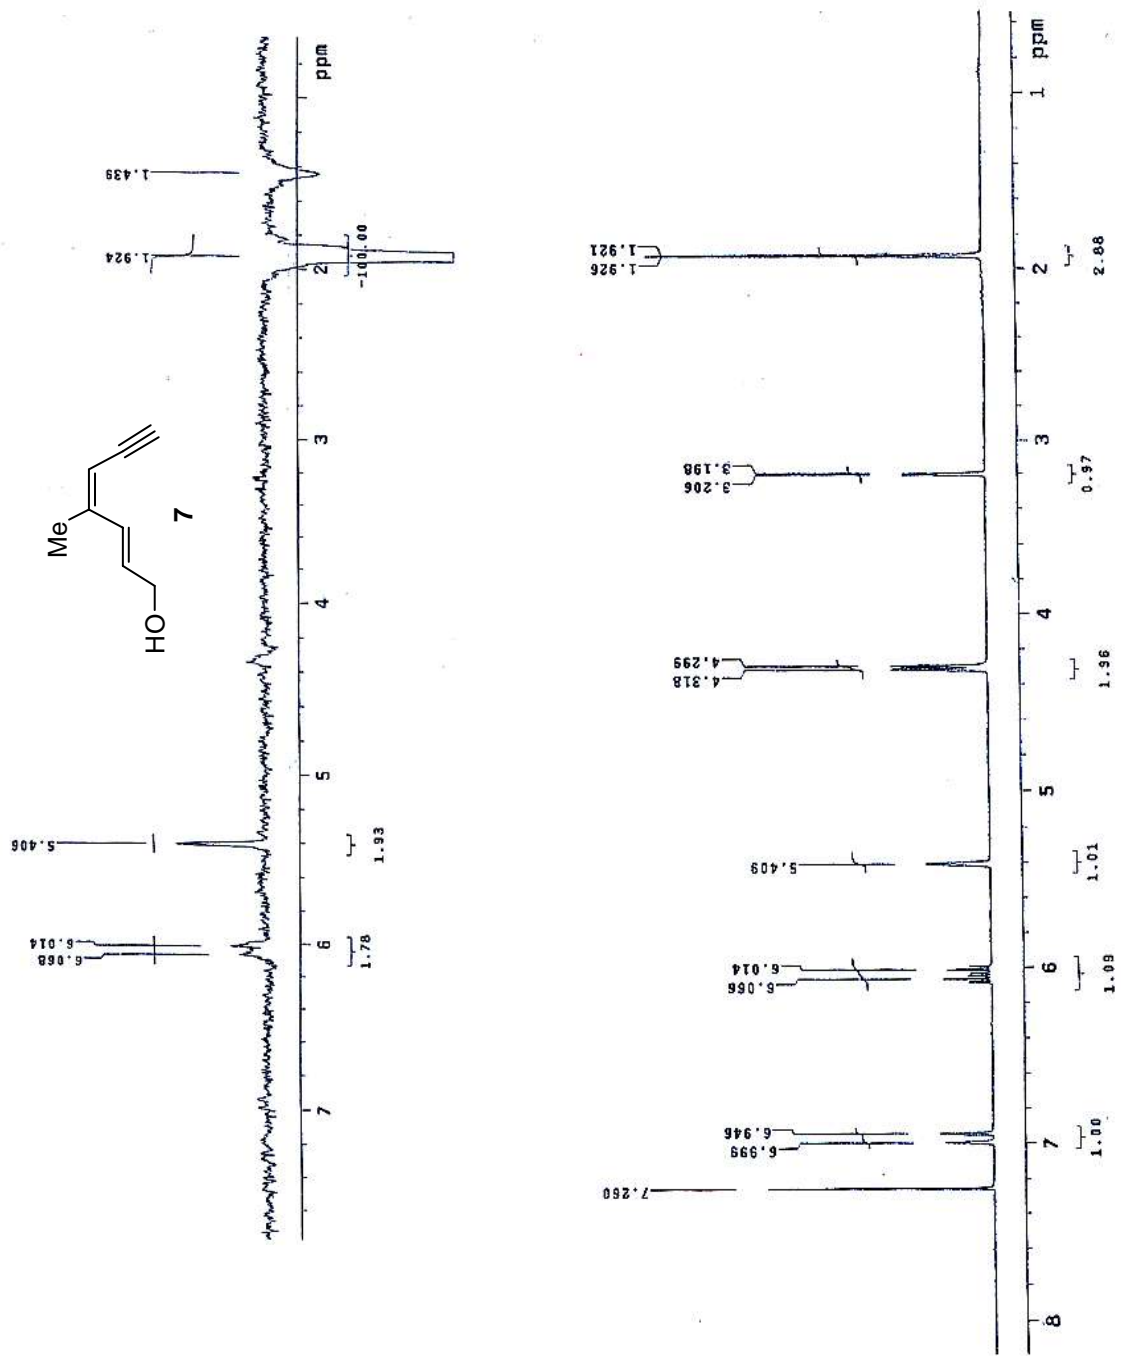

Chao Wang, Tomas Tobrman, Zhaoqing Xu, and Ei-ichi Negishi\*

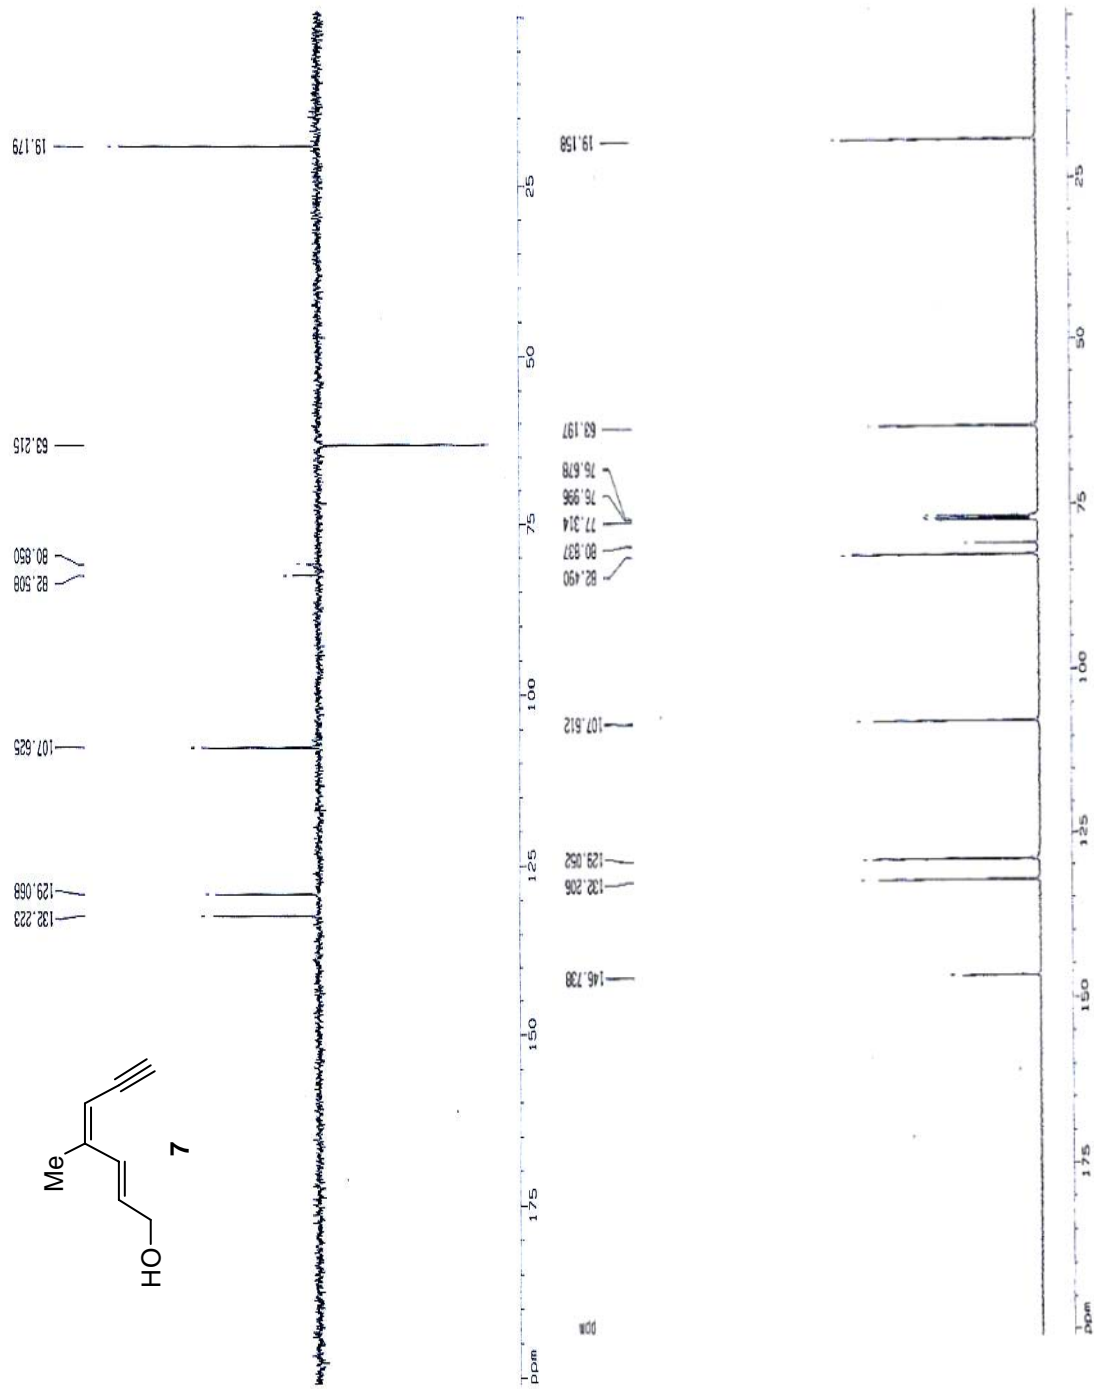

# Highly Regio- and Stereoselective Synthesis of Z-Trisubstituted Alkenes via Propyne Bromoboration and Tandem Pd-Catalyzed Cross-Coupling

Chao Wang, Tomas Tobrman, Zhaoqing Xu, and Ei-ichi Negishi\*

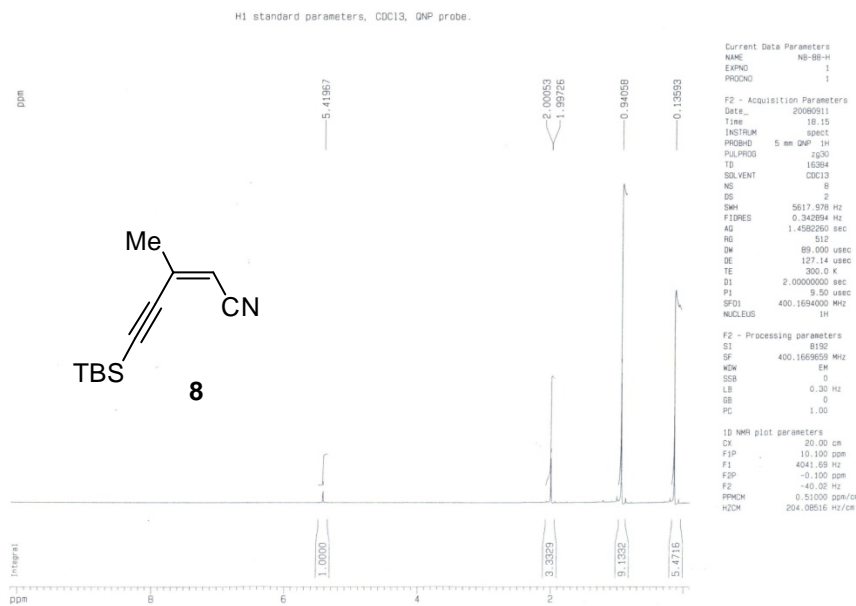

Turn spinning off.

Data Collected on: inova300-1-inovahifreq  
 archive directory: /home/tobrman/vmrsys/data  
 Sample directory: /  
 File: cyclenoe

Pulse Sequence: cyclenoe  
 Solvent: CDCl3  
 Relax. delay 0.100 sec  
 Pulse 190.4 degrees  
 Mixing 0.500 sec  
 Acq. time 2.150 sec  
 Width 3739.4 Hz  
 68 repetitions  
 OBSERVE H1, 299.9598924 MHz  
 DATA PROCESSING  
 Line broadening 1.0 Hz  
 FT size 16384  
 Total time 7 min

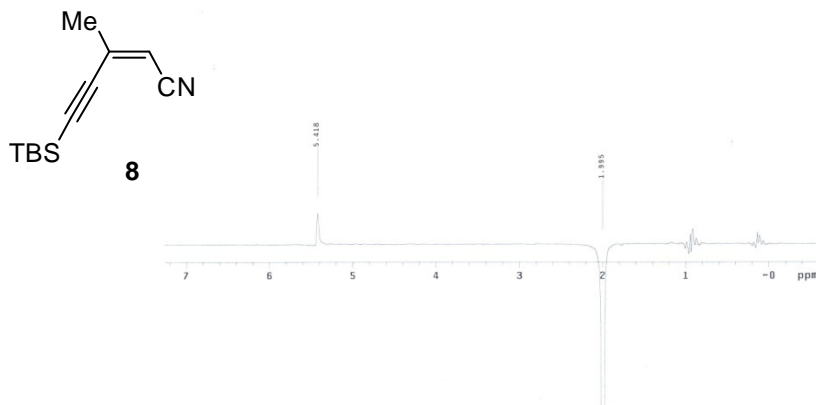





# Highly Regio- and Stereoselective Synthesis of Z-Trisubstituted Alkenes via Propyne Bromoboration and Tandem Pd-Catalyzed Cross-Coupling

Chao Wang, Tomas Tobrman, Zhaoqing Xu, and Ei-ichi Negishi\*

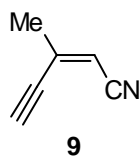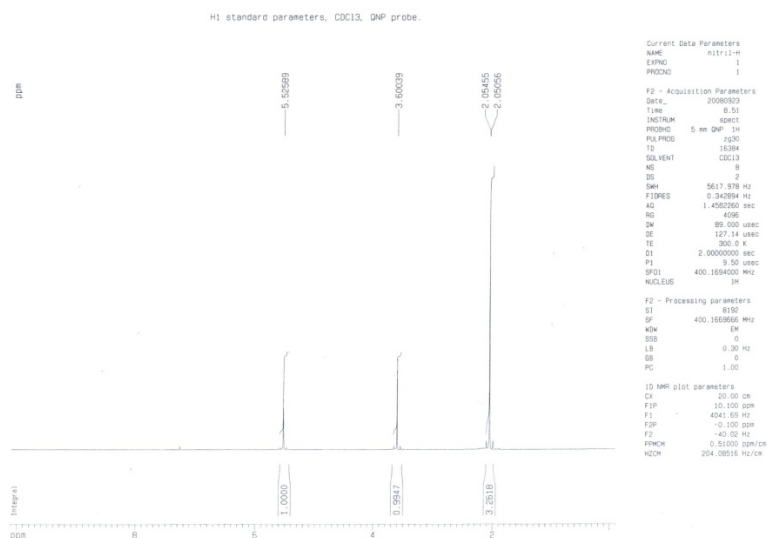

Turn spinning off.  
 Data Collected on: Inova300-1-InovaHfreq  
 Archive directory: /home/ttoberman/vnmrsys/data  
 Sample directory:  
 File: NB-191-NOE  
 Pulse Sequence: cyclenoe  
 Solvent: CDCl3  
 Relax. delay 8.100 sec  
 Pulse 106.4 degree  
 Mixing 8.100 sec  
 Acq: 1.000 2.156 sec  
 Width 3789.2 Hz  
 48 repetitions  
 OBSERVE H1 299.9598689 MHz  
 DATA PROCESSING  
 Line Broadening 1.0 Hz  
 FT size 16384  
 Total time 7 min

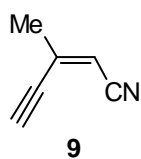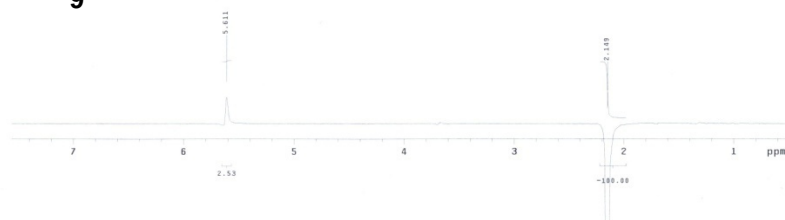

# Highly Regio- and Stereoselective Synthesis of Z-Trisubstituted Alkenes via Propyne Bromoboration and Tandem Pd-Catalyzed Cross-Coupling

Chao Wang, Tomas Tobrman, Zhaoqing Xu, and Ei-ichi Negishi\*

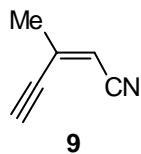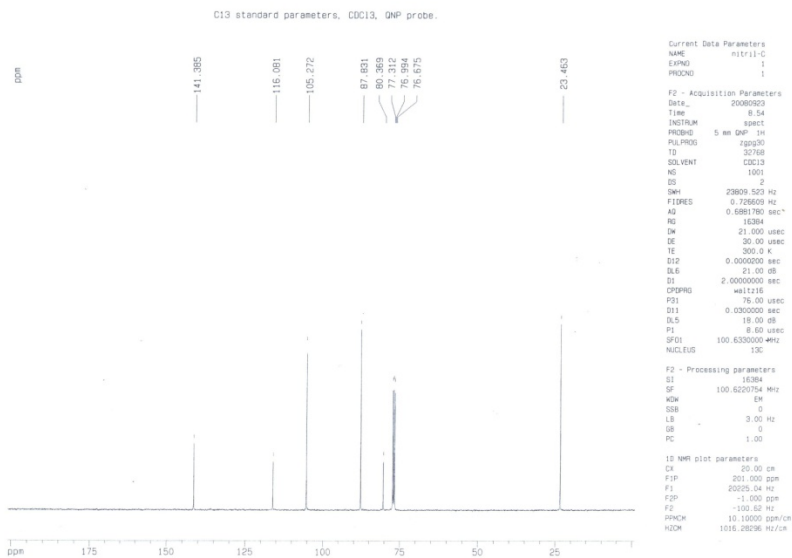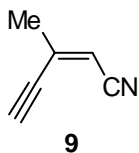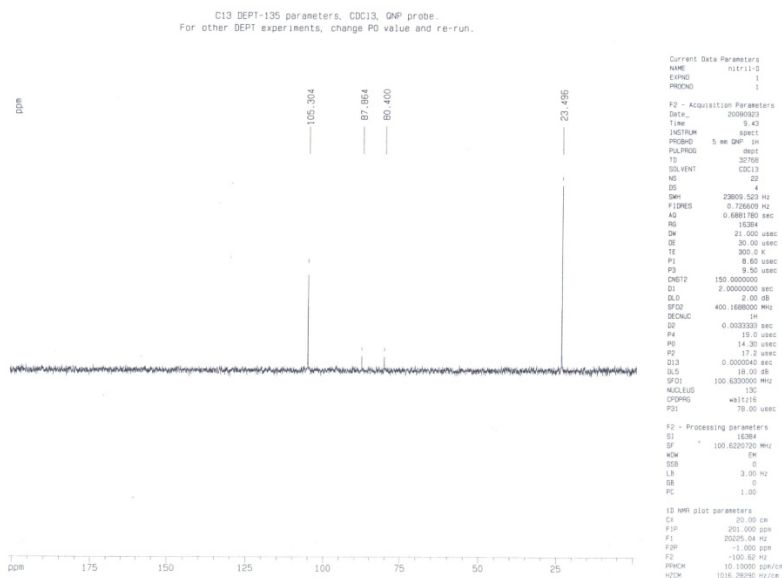

Supplement: NIHMS140823-supplement-1_si_001.pdf [file NIHMS140823-supplement-1_si_001.pdf]
